# Supplementary material
Source: publisher figshare collection journal article supplement (https://acs.figshare.com/ndownloader/files/11749550)
Supplement: Supplementary file 1 [file 11749550]

## Sheet: Table S1
Table S1. The list of upregulated proteins in grx1△.
Accession	Gene Name	Description	Score	Coverage	Unique Peptides	PSMs	Variability	Mean Ratio ± SD	p-value
P39976	DLD3	D-2-hydroxyglutarate--pyruvate transhydrogenase DLD3 OS=Saccharomyces cerevisiae (strain ATCC 204508 / S288c) GN=DLD3 PE=1 SV=1 - [DLD3_YEAST]	140.688	41.53	16	44	46.3927	2.55±0.03	0.000119186
P18238	AAC3	ADP,ATP carrier protein 3 OS=Saccharomyces cerevisiae (strain ATCC 204508 / S288c) GN=AAC3 PE=1 SV=1 - [ADT3_YEAST]	113.067	19.22	2	36	11.6827	2.46±0.17	0.00428373
P32466	HXT3	Low-affinity glucose transporter HXT3 OS=Saccharomyces cerevisiae (strain ATCC 204508 / S288c) GN=HXT3 PE=1 SV=1 - [HXT3_YEAST]	34.3625	14.81	5	9	33.7146	2.38±0.26	0.0113083
P32451	BIO2	Biotin synthase, mitochondrial OS=Saccharomyces cerevisiae (strain ATCC 204508 / S288c) GN=BIO2 PE=1 SV=2 - [BIOB_YEAST]	5.6429	4.53	2	2	3.93984	2.27±0.24	0.0119578
Q96VH4	HBN1	Putative nitroreductase HBN1 OS=Saccharomyces cerevisiae (strain ATCC 204508 / S288c) GN=HBN1 PE=1 SV=1 - [HBN1_YEAST]	43.3462	29.02	5	13	22.9201	2.21±0.17	0.00645947
P38331	YBR242W	HD domain-containing protein YBR242W OS=Saccharomyces cerevisiae (strain ATCC 204508 / S288c) GN=YBR242W PE=1 SV=1 - [YB92_YEAST]	5.92361	12.18	2	2	28.8745	2.16±0.1	0.00230398
P40347	LTP1	Low molecular weight phosphotyrosine protein phosphatase OS=Saccharomyces cerevisiae (strain ATCC 204508 / S288c) GN=LTP1 PE=1 SV=1 - [PPAL_YEAST]	20.772	25.47	4	6	22.4657	2.1±0.19	0.0100373
P41277	GPP1	Glycerol-1-phosphate phosphohydrolase 1 OS=Saccharomyces cerevisiae (strain ATCC 204508 / S288c) GN=GPP1 PE=1 SV=3 - [GPP1_YEAST]	200.94	48	9	58	34.8241	2.05±0.17	0.00880445
P21524	RNR1	Ribonucleoside-diphosphate reductase large chain 1 OS=Saccharomyces cerevisiae (strain ATCC 204508 / S288c) GN=RNR1 PE=1 SV=2 - [RIR1_YEAST]	63.0098	19.03	15	20	38.244	2±0.11	0.00410629
P38693	PHO12	Acid phosphatase PHO12 OS=Saccharomyces cerevisiae (strain ATCC 204508 / S288c) GN=PHO12 PE=1 SV=1 - [PPAC_YEAST]	98.4869	29.98	8	31	29.6705	1.99±0.22	0.0167121
P39533	ACO2	Homocitrate dehydratase, mitochondrial OS=Saccharomyces cerevisiae (strain ATCC 204508 / S288c) GN=ACO2 PE=1 SV=1 - [ACON2_YEAST]	93.883	25.98	15	29	31.9976	1.91±0.07	0.00213826
P32583	SRP40	Suppressor protein SRP40 OS=Saccharomyces cerevisiae (strain ATCC 204508 / S288c) GN=SRP40 PE=1 SV=2 - [SRP40_YEAST]	16.9522	17.73	4	5	21.1774	1.87±0.15	0.00958639
P33302	PDR5	Pleiotropic ABC efflux transporter of multiple drugs OS=Saccharomyces cerevisiae (strain ATCC 204508 / S288c) GN=PDR5 PE=1 SV=1 - [PDR5_YEAST]	55.0557	10.99	11	17	25.3762	1.86±0.03	0.000473284
P49573	CTR1	Copper transport protein CTR1 OS=Saccharomyces cerevisiae (strain ATCC 204508 / S288c) GN=CTR1 PE=1 SV=1 - [CTR1_YEAST]	10.4097	8.13	3	3	15.2701	1.85±0.23	0.0232678
P53281	LSB1	LAS seventeen-binding protein 1 OS=Saccharomyces cerevisiae (strain ATCC 204508 / S288c) GN=LSB1 PE=1 SV=1 - [LSB1_YEAST]	31.7387	28.63	4	8	12.535	1.81±0.04	0.000910617
P37303	GLY1	Low specificity L-threonine aldolase OS=Saccharomyces cerevisiae (strain ATCC 204508 / S288c) GN=GLY1 PE=1 SV=2 - [GLY1_YEAST]	78.29	48.84	12	23	48.0889	1.81±0.15	0.0118126
P38143	GPX2	Glutathione peroxidase 2 OS=Saccharomyces cerevisiae (strain ATCC 204508 / S288c) GN=GPX2 PE=1 SV=1 - [GPX2_YEAST]	62.0664	65.43	7	21	27.2807	1.79±0.08	0.00303907
P53078	SDT1	Suppressor of disruption of TFIIS OS=Saccharomyces cerevisiae (strain ATCC 204508 / S288c) GN=SDT1 PE=1 SV=1 - [SDT1_YEAST]	10.3259	13.57	2	3	7.0866	1.78±0.14	0.0111104
P37298	SDH4	Succinate dehydrogenase [ubiquinone] cytochrome b small subunit, mitochondrial OS=Saccharomyces cerevisiae (strain ATCC 204508 / S288c) GN=SDH4 PE=1 SV=1 - [DHSD_YEAST]	11.8054	14.92	2	4	13.0166	1.77±0.09	0.00454297
P42941	SER2	Phosphoserine phosphatase OS=Saccharomyces cerevisiae (strain ATCC 204508 / S288c) GN=SER2 PE=1 SV=1 - [SERB_YEAST]	122.94	45.31	16	38	23.3635	1.77±0.12	0.008277
P39990	SNU13	13 kDa ribonucleoprotein-associated protein OS=Saccharomyces cerevisiae (strain ATCC 204508 / S288c) GN=SNU13 PE=1 SV=1 - [SNU13_YEAST]	59.6185	56.35	5	18	24.1211	1.74±0.12	0.00822899
P11491	PHO8	Repressible alkaline phosphatase OS=Saccharomyces cerevisiae (strain ATCC 204508 / S288c) GN=PHO8 PE=1 SV=2 - [PPB_YEAST]	59.4688	26.5	10	17	27.4829	1.73±0.06	0.00226554
Q12289	CRC1	Mitochondrial carnitine carrier OS=Saccharomyces cerevisiae (strain ATCC 204508 / S288c) GN=CRC1 PE=1 SV=1 - [CRC1_YEAST]	55.8284	45.87	12	17	34.3799	1.71±0.18	0.0208997
P25567	SRO9	RNA-binding protein SRO9 OS=Saccharomyces cerevisiae (strain ATCC 204508 / S288c) GN=SRO9 PE=1 SV=2 - [SRO9_YEAST]	130.197	39.86	14	36	36.1396	1.71±0.06	0.00224915
P37263	YCR087C-A	UPF0743 protein YCR087C-A OS=Saccharomyces cerevisiae (strain ATCC 204508 / S288c) GN=YCR087C-A PE=1 SV=1 - [YC16_YEAST]	8.92919	15.03	2	3	25.1108	1.69±0.24	0.0390521
P00942	TPI1	Triosephosphate isomerase OS=Saccharomyces cerevisiae (strain ATCC 204508 / S288c) GN=TPI1 PE=1 SV=2 - [TPIS_YEAST]	915.46	73.39	22	242	33.2716	1.69±0.17	0.020466
Q08581	SLK19	Kinetochore protein SLK19 OS=Saccharomyces cerevisiae (strain ATCC 204508 / S288c) GN=SLK19 PE=1 SV=1 - [SLK19_YEAST]	13.8146	6.09	5	5	16.7197	1.69±0.03	0.00047338
P32332	OAC1	Mitochondrial oxaloacetate transport protein OS=Saccharomyces cerevisiae (strain ATCC 204508 / S288c) GN=OAC1 PE=1 SV=1 - [OAC1_YEAST]	28.2475	8.95	2	9	48.6314	1.69±0.01	4.37565e-05
Q08492	BUD21	Bud site selection protein 21 OS=Saccharomyces cerevisiae (strain ATCC 204508 / S288c) GN=BUD21 PE=1 SV=1 - [BUD21_YEAST]	20.9146	28.97	3	6	13.2673	1.68±0.09	0.00550563
P32568	SNQ2	Protein SNQ2 OS=Saccharomyces cerevisiae (strain ATCC 204508 / S288c) GN=SNQ2 PE=1 SV=2 - [SNQ2_YEAST]	13.9094	4.53	4	4	11.0466	1.68±0.05	0.00190371
P38840	ARO9	Aromatic amino acid aminotransferase 2 OS=Saccharomyces cerevisiae (strain ATCC 204508 / S288c) GN=ARO9 PE=1 SV=3 - [ARO9_YEAST]	60.7376	37.82	15	21	21.1307	1.66±0.08	0.00483922
P38958	PET100	Protein PET100, mitochondrial OS=Saccharomyces cerevisiae (strain ATCC 204508 / S288c) GN=PET100 PE=1 SV=1 - [PT100_YEAST]	6.4131	14.41	2	2	18.6994	1.66±0.04	0.00142354
P49089	ASN1	Asparagine synthetase [glutamine-hydrolyzing] 1 OS=Saccharomyces cerevisiae (strain ATCC 204508 / S288c) GN=ASN1 PE=1 SV=2 - [ASNS1_YEAST]	284.98	44.23	20	90	41.595	1.65±0.03	0.000680956
P38988	GGC1	Mitochondrial GTP/GDP carrier protein 1 OS=Saccharomyces cerevisiae (strain ATCC 204508 / S288c) GN=GGC1 PE=1 SV=1 - [GGC1_YEAST]	38.4495	29	7	12	17.6492	1.65±0.06	0.0028941
P25379	CHA1	Catabolic L-serine/threonine dehydratase OS=Saccharomyces cerevisiae (strain ATCC 204508 / S288c) GN=CHA1 PE=1 SV=2 - [STDH_YEAST]	47.3063	40	9	14	27.4922	1.64±0.22	0.037441
Q99288	DET1	Broad-range acid phosphatase DET1 OS=Saccharomyces cerevisiae (strain ATCC 204508 / S288c) GN=DET1 PE=1 SV=1 - [DET1_YEAST]	32.0699	23.65	6	9	32.4549	1.63±0.22	0.0369545
Q03028	ODC1	Mitochondrial 2-oxodicarboxylate carrier 1 OS=Saccharomyces cerevisiae (strain ATCC 204508 / S288c) GN=ODC1 PE=1 SV=1 - [ODC1_YEAST]	41.2845	20	9	13	23.0305	1.63±0.15	0.0188328
Q06252	YLR179C	Uncharacterized protein YLR179C OS=Saccharomyces cerevisiae (strain ATCC 204508 / S288c) GN=YLR179C PE=1 SV=1 - [YL179_YEAST]	184.034	61.69	10	57	36.5491	1.62±0.07	0.00417123
Q05905	HRI1	Protein HRI1 OS=Saccharomyces cerevisiae (strain ATCC 204508 / S288c) GN=HRI1 PE=1 SV=1 - [HRI1_YEAST]	214.113	62.7	16	59	35.8698	1.62±0.1	0.00937579
Q12452	ERG27	3-keto-steroid reductase OS=Saccharomyces cerevisiae (strain ATCC 204508 / S288c) GN=ERG27 PE=1 SV=1 - [ERG27_YEAST]	32.3129	22.77	8	10	37.9158	1.62±0.1	0.00831827
P10614	ERG11	Lanosterol 14-alpha demethylase OS=Saccharomyces cerevisiae (strain ATCC 204508 / S288c) GN=ERG11 PE=1 SV=1 - [CP51_YEAST]	14.6517	9.62	3	5	17.4377	1.61±0.13	0.0149484
P24783	DBP2	ATP-dependent RNA helicase DBP2 OS=Saccharomyces cerevisiae (strain ATCC 204508 / S288c) GN=DBP2 PE=1 SV=1 - [DBP2_YEAST]	132	34.98	18	43	34.3686	1.61±0.07	0.00425547
Q3E833	PCC1	EKC/KEOPS complex subunit PCC1 OS=Saccharomyces cerevisiae (strain ATCC 204508 / S288c) GN=PCC1 PE=1 SV=1 - [PCC1_YEAST]	33.7664	65.91	5	11	17.143	1.61±0.16	0.0229427
P36013	MAE1	NAD-dependent malic enzyme, mitochondrial OS=Saccharomyces cerevisiae (strain ATCC 204508 / S288c) GN=MAE1 PE=1 SV=1 - [MAOM_YEAST]	221.678	49.78	27	62	31.2825	1.61±0.06	0.00299194
P34226	SKT5	Protein SKT5 OS=Saccharomyces cerevisiae (strain ATCC 204508 / S288c) GN=SKT5 PE=1 SV=1 - [SKT5_YEAST]	6.14882	4.31	2	2	20.475	1.61±0.09	0.00788822
P53183	YGL039W	Putative uncharacterized oxidoreductase YGL039W OS=Saccharomyces cerevisiae (strain ATCC 204508 / S288c) GN=YGL039W PE=1 SV=1 - [YGD9_YEAST]	30.9989	33.05	7	10	13.6734	1.6±0.05	0.00228595
P32528	DUR1,2	Urea amidolyase OS=Saccharomyces cerevisiae (strain ATCC 204508 / S288c) GN=DUR1,2 PE=1 SV=2 - [DUR1_YEAST]	91.5506	16.68	22	30	29.9586	1.6±0.07	0.00415701
Q06408	ARO10	Transaminated amino acid decarboxylase OS=Saccharomyces cerevisiae (strain ATCC 204508 / S288c) GN=ARO10 PE=1 SV=1 - [ARO10_YEAST]	112.499	33.86	17	37	40.5477	1.6±0.05	0.00269181
Q07540	YFH1	Frataxin homolog, mitochondrial OS=Saccharomyces cerevisiae (strain ATCC 204508 / S288c) GN=YFH1 PE=1 SV=1 - [FRDA_YEAST]	21.5034	20.69	3	8	15.9236	1.6±0.08	0.00568626
Q04307	RPC11	DNA-directed RNA polymerase III subunit RPC10 OS=Saccharomyces cerevisiae (strain ATCC 204508 / S288c) GN=RPC11 PE=1 SV=1 - [RPC10_YEAST]	27.1269	31.82	4	7	11.3203	1.59±0.14	0.0179963
P53081	NIF3	NGG1-interacting factor 3 OS=Saccharomyces cerevisiae (strain ATCC 204508 / S288c) GN=NIF3 PE=1 SV=1 - [NIF3_YEAST]	74.8218	46.18	10	20	43.4104	1.59±0.11	0.0117377
P25618	CWH43	Protein CWH43 OS=Saccharomyces cerevisiae (strain ATCC 204508 / S288c) GN=CWH43 PE=1 SV=2 - [CWH43_YEAST]	5.85367	2.41	2	2	19.0118	1.59±0.18	0.0309826
P39111	VMA7	V-type proton ATPase subunit F OS=Saccharomyces cerevisiae (strain ATCC 204508 / S288c) GN=VMA7 PE=1 SV=1 - [VATF_YEAST]	31.5529	23.73	3	10	24.0466	1.58±0.23	0.0465984
P28272	URA1	Dihydroorotate dehydrogenase (fumarate) OS=Saccharomyces cerevisiae (strain ATCC 204508 / S288c) GN=URA1 PE=1 SV=1 - [PYRD_YEAST]	128.94	49.36	10	41	27.8275	1.58±0.08	0.00550381
P53742	NOG2	Nucleolar GTP-binding protein 2 OS=Saccharomyces cerevisiae (strain ATCC 204508 / S288c) GN=NOG2 PE=1 SV=1 - [NOG2_YEAST]	37.4331	20.78	8	12	18.6144	1.58±0.04	0.00149485
Q08045	LCL2	Long chronological lifespan protein 2 OS=Saccharomyces cerevisiae (strain ATCC 204508 / S288c) GN=LCL2 PE=1 SV=1 - [LCL2_YEAST]	6.45314	16.03	2	2	21.7195	1.57±0.19	0.0352273
P53919	NAF1	H/ACA ribonucleoprotein complex non-core subunit NAF1 OS=Saccharomyces cerevisiae (strain ATCC 204508 / S288c) GN=NAF1 PE=1 SV=1 - [NAF1_YEAST]	10.3667	9.55	3	3	17.2386	1.57±0.12	0.0154127
Q03103	ERO1	Endoplasmic oxidoreductin-1 OS=Saccharomyces cerevisiae (strain ATCC 204508 / S288c) GN=ERO1 PE=1 SV=1 - [ERO1_YEAST]	27.6632	14.92	5	9	15.9375	1.57±0.07	0.00543766
P21147	OLE1	Acyl-CoA desaturase 1 OS=Saccharomyces cerevisiae (strain ATCC 204508 / S288c) GN=OLE1 PE=1 SV=2 - [ACO1_YEAST]	10.5904	8.04	3	3	27.9531	1.56±0.09	0.00758895
P32288	GLN1	Glutamine synthetase OS=Saccharomyces cerevisiae (strain ATCC 204508 / S288c) GN=GLN1 PE=1 SV=4 - [GLNA_YEAST]	183.411	45.68	14	59	38.2961	1.55±0.07	0.00604012
P38169	BNA4	Kynurenine 3-monooxygenase OS=Saccharomyces cerevisiae (strain ATCC 204508 / S288c) GN=BNA4 PE=1 SV=1 - [KMO_YEAST]	31.5454	22.61	7	9	20.3669	1.55±0.1	0.011852
Q03759	YML108W	Uncharacterized protein YML108W OS=Saccharomyces cerevisiae (strain ATCC 204508 / S288c) GN=YML108W PE=1 SV=1 - [YMK8_YEAST]	5.76252	16.19	2	2	7.44544	1.55±0.06	0.00372133
P32476	ERG1	Squalene monooxygenase OS=Saccharomyces cerevisiae (strain ATCC 204508 / S288c) GN=ERG1 PE=1 SV=2 - [ERG1_YEAST]	34.3151	20.97	9	12	25.7512	1.55±0.1	0.0100747
Q04223	YMR130W	Uncharacterized protein YMR130W OS=Saccharomyces cerevisiae (strain ATCC 204508 / S288c) GN=YMR130W PE=3 SV=1 - [YM14_YEAST]	10.5943	7.62	2	4	23.0284	1.55±0.17	0.0290971
Q06580	MLC2	Myosin light chain 2 OS=Saccharomyces cerevisiae (strain ATCC 204508 / S288c) GN=MLC2 PE=1 SV=1 - [MLC2_YEAST]	17.274	26.99	3	5	13.0997	1.54±0.06	0.00375123
P39003	HXT6	High-affinity hexose transporter HXT6 OS=Saccharomyces cerevisiae (strain ATCC 204508 / S288c) GN=HXT6 PE=1 SV=2 - [HXT6_YEAST]	27.1332	10.7	5	8	24.9221	1.54±0.05	0.00335363
P23641	MIR1	Mitochondrial phosphate carrier protein OS=Saccharomyces cerevisiae (strain ATCC 204508 / S288c) GN=MIR1 PE=1 SV=1 - [MPCP_YEAST]	157.864	47.91	13	44	26.0996	1.54±0.04	0.00220986
Q12522	TIF6	Eukaryotic translation initiation factor 6 OS=Saccharomyces cerevisiae (strain ATCC 204508 / S288c) GN=TIF6 PE=1 SV=1 - [IF6_YEAST]	56.8395	34.29	6	18	35.5095	1.53±0.15	0.0245819
P38777	FSH1	Family of serine hydrolases 1 OS=Saccharomyces cerevisiae (strain ATCC 204508 / S288c) GN=FSH1 PE=1 SV=1 - [FSH1_YEAST]	97.9241	70.37	15	28	26.7687	1.53±0.07	0.00503728
P33303	SFC1	Succinate/fumarate mitochondrial transporter OS=Saccharomyces cerevisiae (strain ATCC 204508 / S288c) GN=SFC1 PE=1 SV=2 - [SFC1_YEAST]	98.0346	44.41	14	31	37.1558	1.53±0.06	0.00380174
Q12029	FSF1	Probable mitochondrial transport protein FSF1 OS=Saccharomyces cerevisiae (strain ATCC 204508 / S288c) GN=FSF1 PE=1 SV=1 - [FSF1_YEAST]	38.3229	29.05	9	12	36.8908	1.53±0.2	0.0431007
P49367	LYS4	Homoaconitase, mitochondrial OS=Saccharomyces cerevisiae (strain ATCC 204508 / S288c) GN=LYS4 PE=1 SV=1 - [LYS4_YEAST]	131.09	33.33	15	38	23.4394	1.53±0.05	0.00262079
P38858	SOL3	6-phosphogluconolactonase 3 OS=Saccharomyces cerevisiae (strain ATCC 204508 / S288c) GN=SOL3 PE=1 SV=2 - [SOL3_YEAST]	110.53	52.21	15	35	26.0515	1.52±0.05	0.00353213
P04807	HXK2	Hexokinase-2 OS=Saccharomyces cerevisiae (strain ATCC 204508 / S288c) GN=HXK2 PE=1 SV=4 - [HXKB_YEAST]	876.714	69.34	32	254	37.6124	1.52±0.04	0.0019677
P18239	PET9	ADP,ATP carrier protein 2 OS=Saccharomyces cerevisiae (strain ATCC 204508 / S288c) GN=PET9 PE=1 SV=2 - [ADT2_YEAST]	322.797	44.34	16	99	29.0122	1.52±0.13	0.0202663
P38697	IMD2	Inosine-5'-monophosphate dehydrogenase 2 OS=Saccharomyces cerevisiae (strain ATCC 204508 / S288c) GN=IMD2 PE=1 SV=1 - [IMDH2_YEAST]	400.405	48.95	5	106	28.8678	1.52±0.2	0.0444546
P38086	RDH54	DNA repair and recombination protein RDH54 OS=Saccharomyces cerevisiae (strain ATCC 204508 / S288c) GN=RDH54 PE=1 SV=4 - [RDH54_YEAST]	5.727	2.92	2	2	15.4804	1.52±0.07	0.00615791
P40007	NOP16	Nucleolar protein 16 OS=Saccharomyces cerevisiae (strain ATCC 204508 / S288c) GN=NOP16 PE=1 SV=1 - [NOP16_YEAST]	25.5475	24.24	6	9	14.7447	1.52±0.16	0.029317
P13856	RSR1	Ras-related protein RSR1 OS=Saccharomyces cerevisiae (strain ATCC 204508 / S288c) GN=RSR1 PE=3 SV=1 - [RSR1_YEAST]	6.01058	7.72	2	2	15.4304	1.51±0.05	0.00358941
P38891	BAT1	Branched-chain-amino-acid aminotransferase, mitochondrial OS=Saccharomyces cerevisiae (strain ATCC 204508 / S288c) GN=BAT1 PE=1 SV=1 - [BCA1_YEAST]	283.988	55.98	18	83	28.3735	1.51±0.06	0.00389707
P36152	DRE2	Fe-S cluster assembly protein DRE2 OS=Saccharomyces cerevisiae (strain ATCC 204508 / S288c) GN=DRE2 PE=1 SV=1 - [DRE2_YEAST]	18.8201	12.07	3	6	10.3592	1.51±0.06	0.00541735
Q05926	GRX8	Glutaredoxin-8 OS=Saccharomyces cerevisiae (strain ATCC 204508 / S288c) GN=GRX8 PE=1 SV=1 - [GLRX8_YEAST]	18.9991	26.61	3	6	11.6662	1.5±0.08	0.00918709
P34078	LTV1	Protein LTV1 OS=Saccharomyces cerevisiae (strain ATCC 204508 / S288c) GN=LTV1 PE=1 SV=2 - [LTV1_YEAST]	15.3709	14.69	4	5	26.7643	1.5±0.11	0.0150354
P40893	REE1	Regulation of enolase protein 1 OS=Saccharomyces cerevisiae (strain ATCC 204508 / S288c) GN=REE1 PE=1 SV=1 - [REE1_YEAST]	201.311	82.32	14	58	30.6956	1.5±0.04	0.0018077
Q02725	VTC3	Vacuolar transporter chaperone 3 OS=Saccharomyces cerevisiae (strain ATCC 204508 / S288c) GN=VTC3 PE=1 SV=1 - [VTC3_YEAST]	98.2296	25.75	18	31	30.2257	1.5±0.12	0.0174948
Q12031	ICL2	Mitochondrial 2-methylisocitrate lyase OS=Saccharomyces cerevisiae (strain ATCC 204508 / S288c) GN=ICL2 PE=1 SV=1 - [ACEB_YEAST]	80.2949	31.48	16	25	23.0437	1.5±0.05	0.00302257
P34253	KTI12	Protein KTI12 OS=Saccharomyces cerevisiae (strain ATCC 204508 / S288c) GN=KTI12 PE=1 SV=2 - [KTI12_YEAST]	13.7938	15.34	4	5	17.5752	1.5±0.2	0.0497782
Q07623	NOP6	Nucleolar protein 6 OS=Saccharomyces cerevisiae (strain ATCC 204508 / S288c) GN=NOP6 PE=1 SV=1 - [NOP6_YEAST]	35.3324	21.78	3	10	40.8351	1.5±0.1	0.0129825
P47143	ADO1	Adenosine kinase OS=Saccharomyces cerevisiae (strain ATCC 204508 / S288c) GN=ADO1 PE=1 SV=1 - [ADK_YEAST]	310.038	55.88	15	94	25.6093	1.5±0.09	0.0107255
P47120	LIA1	Deoxyhypusine hydroxylase OS=Saccharomyces cerevisiae (strain ATCC 204508 / S288c) GN=LIA1 PE=1 SV=1 - [DOHH_YEAST]	235.394	71.38	19	64	31.3704	1.49±0.03	0.00162962
P16521	YEF3	Elongation factor 3A OS=Saccharomyces cerevisiae (strain ATCC 204508 / S288c) GN=YEF3 PE=1 SV=4 - [EF3A_YEAST]	1038.49	56.42	45	322	31.686	1.48±0.04	0.00216859
P36160	RPF2	Ribosome biogenesis protein RPF2 OS=Saccharomyces cerevisiae (strain ATCC 204508 / S288c) GN=RPF2 PE=1 SV=1 - [RPF2_YEAST]	12.4217	6.4	2	4	12.4542	1.48±0.16	0.0341296
Q00245	RHO3	GTP-binding protein RHO3 OS=Saccharomyces cerevisiae (strain ATCC 204508 / S288c) GN=RHO3 PE=1 SV=2 - [RHO3_YEAST]	58.315	51.95	7	18	23.8522	1.47±0.03	0.00135071
P10592	SSA2	Heat shock protein SSA2 OS=Saccharomyces cerevisiae (strain ATCC 204508 / S288c) GN=SSA2 PE=1 SV=3 - [HSP72_YEAST]	2255.73	74.02	14	646	23.5597	1.47±0.05	0.00399646
P25608	YCR102C	Uncharacterized protein YCR102C OS=Saccharomyces cerevisiae (strain ATCC 204508 / S288c) GN=YCR102C PE=3 SV=1 - [YCZ2_YEAST]	13.4503	11.14	2	5	33.017	1.47±0.06	0.0059381
P04161	ADE8	Phosphoribosylglycinamide formyltransferase OS=Saccharomyces cerevisiae (strain ATCC 204508 / S288c) GN=ADE8 PE=1 SV=1 - [PUR3_YEAST]	80.3332	39.72	9	23	30.8168	1.47±0.12	0.0221711
Q04013	YHM2	Citrate/oxoglutarate carrier protein OS=Saccharomyces cerevisiae (strain ATCC 204508 / S288c) GN=YHM2 PE=1 SV=1 - [YHM2_YEAST]	65.1634	26.75	9	20	25.5165	1.47±0.08	0.00857572
Q03233	ADD37	Alpha1-proteinase inhibitor-degradation deficient protein 37 OS=Saccharomyces cerevisiae (strain ATCC 204508 / S288c) GN=ADD37 PE=1 SV=1 - [ADD37_YEAST]	16.7058	19.7	4	6	8.85482	1.46±0.08	0.0100377
P10659	SAM1	S-adenosylmethionine synthase 1 OS=Saccharomyces cerevisiae (strain ATCC 204508 / S288c) GN=SAM1 PE=1 SV=2 - [METK1_YEAST]	239.389	58.38	10	67	31.4198	1.46±0.03	0.00101628
P53883	NOP13	Nucleolar protein 13 OS=Saccharomyces cerevisiae (strain ATCC 204508 / S288c) GN=NOP13 PE=1 SV=2 - [NOP13_YEAST]	31.9056	27.54	10	10	38.8176	1.46±0.05	0.00461563
P40416	ATM1	Iron-sulfur clusters transporter ATM1, mitochondrial OS=Saccharomyces cerevisiae (strain ATCC 204508 / S288c) GN=ATM1 PE=1 SV=2 - [ATM1_YEAST]	11.25	8.55	4	4	11.3556	1.46±0.04	0.00207651
P25617	YCR016W	Uncharacterized protein YCR016W OS=Saccharomyces cerevisiae (strain ATCC 204508 / S288c) GN=YCR016W PE=1 SV=2 - [YCQ6_YEAST]	11.3578	18.62	4	4	18.9955	1.45±0.03	0.00187561
P01119	RAS1	Ras-like protein 1 OS=Saccharomyces cerevisiae (strain ATCC 204508 / S288c) GN=RAS1 PE=1 SV=2 - [RAS1_YEAST]	22.4326	22.33	3	7	12.259	1.45±0.09	0.0138467
P53736	YNR040W	Uncharacterized protein YNR040W OS=Saccharomyces cerevisiae (strain ATCC 204508 / S288c) GN=YNR040W PE=1 SV=1 - [YN8O_YEAST]	9.76878	10.94	2	3	10.3141	1.45±0.06	0.00551584
P34220	YBL055C	Deoxyribonuclease Tat-D OS=Saccharomyces cerevisiae (strain ATCC 204508 / S288c) GN=YBL055C PE=1 SV=1 - [YBF5_YEAST]	37.937	21.77	6	10	14.5397	1.45±0.03	0.00198344
P16474	KAR2	78 kDa glucose-regulated protein homolog OS=Saccharomyces cerevisiae (strain ATCC 204508 / S288c) GN=KAR2 PE=1 SV=1 - [GRP78_YEAST]	489.09	50.29	37	150	24.5279	1.45±0.03	0.00151098
Q99258	RIB3	3,4-dihydroxy-2-butanone 4-phosphate synthase OS=Saccharomyces cerevisiae (strain ATCC 204508 / S288c) GN=RIB3 PE=1 SV=1 - [RIB3_YEAST]	117.118	56.25	11	41	31.7941	1.45±0.11	0.0207186
P53335	PXR1	Protein PXR1 OS=Saccharomyces cerevisiae (strain ATCC 204508 / S288c) GN=PXR1 PE=1 SV=1 - [PXR1_YEAST]	5.94599	11.07	2	2	27.3952	1.44±0.06	0.00594847
P53141	MLC1	Myosin light chain 1 OS=Saccharomyces cerevisiae (strain ATCC 204508 / S288c) GN=MLC1 PE=1 SV=1 - [MLC1_YEAST]	196.909	86.58	19	57	23.2624	1.44±0.17	0.043759
P38113	ADH5	Alcohol dehydrogenase 5 OS=Saccharomyces cerevisiae (strain ATCC 204508 / S288c) GN=ADH5 PE=1 SV=1 - [ADH5_YEAST]	68.9744	30.77	7	23	26.6278	1.44±0.05	0.00373582
Q86ZR7	YKL033W-A	Putative uncharacterized hydrolase YKL033W-A OS=Saccharomyces cerevisiae (strain ATCC 204508 / S288c) GN=YKL033W-A PE=3 SV=2 - [YKD3A_YEAST]	32.1139	32.2	8	10	28.4051	1.44±0.05	0.00479161
P00401	COX1	Cytochrome c oxidase subunit 1 OS=Saccharomyces cerevisiae (strain ATCC 204508 / S288c) GN=COX1 PE=3 SV=2 - [COX1_YEAST]	38.1723	4.31	3	11	21.1304	1.44±0.05	0.00439968
Q6Q547	NOP10	H/ACA ribonucleoprotein complex subunit 3 OS=Saccharomyces cerevisiae (strain ATCC 204508 / S288c) GN=NOP10 PE=1 SV=1 - [NOP10_YEAST]	24.78	55.17	4	8	40.4	1.43±0.13	0.0305096
Q01802	AAT1	Aspartate aminotransferase, mitochondrial OS=Saccharomyces cerevisiae (strain ATCC 204508 / S288c) GN=AAT1 PE=1 SV=2 - [AATM_YEAST]	19.924	16.41	6	7	16.5119	1.43±0.07	0.00918381
P09440	MIS1	C-1-tetrahydrofolate synthase, mitochondrial OS=Saccharomyces cerevisiae (strain ATCC 204508 / S288c) GN=MIS1 PE=1 SV=1 - [C1TM_YEAST]	187.383	38.56	29	58	18.093	1.43±0.02	0.000523913
Q3E7Z5	YIL002W-A	Uncharacterized protein YIL002W-A OS=Saccharomyces cerevisiae (strain ATCC 204508 / S288c) GN=YIL002W-A PE=1 SV=1 - [YI002_YEAST]	26.0918	81.16	5	8	36.505	1.43±0.08	0.012192
P27616	ADE1	Phosphoribosylaminoimidazole-succinocarboxamide synthase OS=Saccharomyces cerevisiae (strain ATCC 204508 / S288c) GN=ADE1 PE=1 SV=2 - [PUR7_YEAST]	457.138	82.35	32	136	29.8863	1.43±0.05	0.00370265
Q04214	TY1B-MR1	Transposon Ty1-MR1 Gag-Pol polyprotein OS=Saccharomyces cerevisiae (strain ATCC 204508 / S288c) GN=TY1B-MR1 PE=1 SV=2 - [YM13B_YEAST]	210.833	17.83	4	64	21.785	1.43±0.11	0.0213591
Q96VH5	MIC10	MICOS complex subunit MIC10 OS=Saccharomyces cerevisiae (strain ATCC 204508 / S288c) GN=MIC10 PE=1 SV=1 - [MIC10_YEAST]	16.2837	31.96	3	5	23.0914	1.43±0.11	0.0220666
P52553	YKE2	Prefoldin subunit 6 OS=Saccharomyces cerevisiae (strain ATCC 204508 / S288c) GN=YKE2 PE=1 SV=1 - [PFD6_YEAST]	108.5	66.67	9	32	23.7515	1.43±0.08	0.0106703
P32875	LIP5	Lipoyl synthase, mitochondrial OS=Saccharomyces cerevisiae (strain ATCC 204508 / S288c) GN=LIP5 PE=1 SV=1 - [LIPA_YEAST]	16.4479	21.5	6	6	13.782	1.43±0.1	0.0192542
P40054	SER3	D-3-phosphoglycerate dehydrogenase 1 OS=Saccharomyces cerevisiae (strain ATCC 204508 / S288c) GN=SER3 PE=1 SV=1 - [SERA_YEAST]	80.2702	30.7	3	26	9.60319	1.43±0.11	0.0197345
P48234	ENP2	Ribosome biogenesis protein ENP2 OS=Saccharomyces cerevisiae (strain ATCC 204508 / S288c) GN=ENP2 PE=1 SV=2 - [NOL10_YEAST]	25.788	12.87	6	7	10.6349	1.43±0.08	0.0102974
P19881	PHO13	4-nitrophenylphosphatase OS=Saccharomyces cerevisiae (strain ATCC 204508 / S288c) GN=PHO13 PE=1 SV=2 - [PNPP_YEAST]	41.6719	35.58	8	12	31.5668	1.43±0.09	0.0143436
P30902	ATP7	ATP synthase subunit d, mitochondrial OS=Saccharomyces cerevisiae (strain ATCC 204508 / S288c) GN=ATP7 PE=1 SV=2 - [ATP7_YEAST]	151.009	58.05	12	41	26.4401	1.42±0.04	0.00293014
Q07938	MEU1	S-methyl-5'-thioadenosine phosphorylase OS=Saccharomyces cerevisiae (strain ATCC 204508 / S288c) GN=MEU1 PE=1 SV=1 - [MTAP_YEAST]	18.0404	14.24	4	6	26.5231	1.42±0.04	0.00320323
P53929	YNL108C	Uncharacterized protein YNL108C OS=Saccharomyces cerevisiae (strain ATCC 204508 / S288c) GN=YNL108C PE=1 SV=1 - [YNK8_YEAST]	8.48688	9.63	2	3	5.65291	1.42±0.13	0.0302531
P38787	PAN5	2-dehydropantoate 2-reductase OS=Saccharomyces cerevisiae (strain ATCC 204508 / S288c) GN=PAN5 PE=1 SV=1 - [PANE_YEAST]	62.7376	32.45	12	20	26.0828	1.41±0.05	0.00438098
P27476	NSR1	Nuclear localization sequence-binding protein OS=Saccharomyces cerevisiae (strain ATCC 204508 / S288c) GN=NSR1 PE=1 SV=1 - [NSR1_YEAST]	156.855	47.58	19	49	30.9989	1.41±0.14	0.0347496
P53111	ARI1	NADPH-dependent aldehyde reductase ARI1 OS=Saccharomyces cerevisiae (strain ATCC 204508 / S288c) GN=ARI1 PE=1 SV=1 - [ARI1_YEAST]	60.255	38.9	9	19	22.8394	1.41±0	4.11081e-05
P39676	YHB1	Flavohemoprotein OS=Saccharomyces cerevisiae (strain ATCC 204508 / S288c) GN=YHB1 PE=1 SV=2 - [FHP_YEAST]	574.846	71.43	20	163	27.6368	1.41±0.05	0.0043207
Q2V2P9	YDR119W-A	Uncharacterized protein YDR119W-A OS=Saccharomyces cerevisiae (strain ATCC 204508 / S288c) GN=YDR119W-A PE=4 SV=1 - [YD19A_YEAST]	10.9562	18.18	2	3	9.84895	1.41±0.04	0.00381972
P40047	ALD5	Aldehyde dehydrogenase 5, mitochondrial OS=Saccharomyces cerevisiae (strain ATCC 204508 / S288c) GN=ALD5 PE=1 SV=4 - [ALDH5_YEAST]	136.045	38.08	17	41	24.1029	1.4±0	2.87973e-06
Q03558	OYE2	NADPH dehydrogenase 2 OS=Saccharomyces cerevisiae (strain ATCC 204508 / S288c) GN=OYE2 PE=1 SV=3 - [OYE2_YEAST]	422.05	52.5	22	128	26.7487	1.4±0.05	0.00476518
Q03305	RMT2	Protein arginine N-methyltransferase 2 OS=Saccharomyces cerevisiae (strain ATCC 204508 / S288c) GN=RMT2 PE=1 SV=1 - [RMT2_YEAST]	6.12125	6.8	2	2	13.4796	1.4±0.11	0.0236003
P03965	CPA2	Carbamoyl-phosphate synthase arginine-specific large chain OS=Saccharomyces cerevisiae (strain ATCC 204508 / S288c) GN=CPA2 PE=1 SV=1 - [CARB_YEAST]	270.925	39.18	31	78	31.441	1.4±0.08	0.0140263
P08466	NUC1	Mitochondrial nuclease OS=Saccharomyces cerevisiae (strain ATCC 204508 / S288c) GN=NUC1 PE=1 SV=1 - [NUC1_YEAST]	14.7267	13.98	3	5	25.9541	1.4±0.03	0.00176905
P53900	GIM3	Prefoldin subunit 4 OS=Saccharomyces cerevisiae (strain ATCC 204508 / S288c) GN=GIM3 PE=1 SV=1 - [PFD4_YEAST]	62.5917	55.81	10	19	31.6564	1.39±0.14	0.0387272
P40422	RPC10	DNA-directed RNA polymerases I, II, and III subunit RPABC4 OS=Saccharomyces cerevisiae (strain ATCC 204508 / S288c) GN=RPC10 PE=1 SV=1 - [RPAB4_YEAST]	25.2118	52.86	4	9	40.5726	1.39±0.07	0.0115688
P39715	ECM1	Shuttling pre-60S factor ECM1 OS=Saccharomyces cerevisiae (strain ATCC 204508 / S288c) GN=ECM1 PE=1 SV=2 - [ECM1_YEAST]	11.4471	22.64	4	4	21.6691	1.39±0.04	0.00370699
P25303	SCJ1	DnaJ-related protein SCJ1 OS=Saccharomyces cerevisiae (strain ATCC 204508 / S288c) GN=SCJ1 PE=1 SV=2 - [SCJ1_YEAST]	46.4863	29.97	9	14	19.9104	1.39±0.02	0.000626559
P15496	IDI1	Isopentenyl-diphosphate Delta-isomerase OS=Saccharomyces cerevisiae (strain ATCC 204508 / S288c) GN=IDI1 PE=1 SV=2 - [IDI1_YEAST]	85.4377	50.69	11	25	32.6388	1.39±0.03	0.00187229
P22139	RPB10	DNA-directed RNA polymerases I, II, and III subunit RPABC5 OS=Saccharomyces cerevisiae (strain ATCC 204508 / S288c) GN=RPB10 PE=1 SV=2 - [RPAB5_YEAST]	15.3254	17.14	2	5	18.8874	1.39±0.11	0.0264104
Q04660	ERB1	Ribosome biogenesis protein ERB1 OS=Saccharomyces cerevisiae (strain ATCC 204508 / S288c) GN=ERB1 PE=1 SV=1 - [ERB1_YEAST]	97.6088	28.38	19	32	23.8815	1.39±0.02	0.000537029
P40010	NUG1	Nuclear GTP-binding protein NUG1 OS=Saccharomyces cerevisiae (strain ATCC 204508 / S288c) GN=NUG1 PE=1 SV=1 - [NUG1_YEAST]	116.404	45.19	21	36	24.8572	1.39±0.05	0.00462465
P42846	KRI1	Protein KRI1 OS=Saccharomyces cerevisiae (strain ATCC 204508 / S288c) GN=KRI1 PE=1 SV=1 - [KRI1_YEAST]	79.6253	32.49	17	24	14.0248	1.39±0.04	0.00369807
Q08746	RRS1	Regulator of ribosome biosynthesis OS=Saccharomyces cerevisiae (strain ATCC 204508 / S288c) GN=RRS1 PE=1 SV=1 - [RRS1_YEAST]	24.9778	41.38	3	6	19.6357	1.39±0.06	0.00699885
Q03532	HAS1	ATP-dependent RNA helicase HAS1 OS=Saccharomyces cerevisiae (strain ATCC 204508 / S288c) GN=HAS1 PE=1 SV=1 - [HAS1_YEAST]	62.0049	23.37	10	20	24.01	1.38±0.09	0.0170364
Q08421	ETT1	Enhancer of translation termination 1 OS=Saccharomyces cerevisiae (strain ATCC 204508 / S288c) GN=ETT1 PE=1 SV=1 - [ETT1_YEAST]	75.5289	26.21	11	24	19.1294	1.38±0.01	0.000122755
P11076	ARF1	ADP-ribosylation factor 1 OS=Saccharomyces cerevisiae (strain ATCC 204508 / S288c) GN=ARF1 PE=1 SV=3 - [ARF1_YEAST]	199.68	51.93	4	61	27.9201	1.38±0.04	0.00390991
Q08985	SAM4	Homocysteine S-methyltransferase 2 OS=Saccharomyces cerevisiae (strain ATCC 204508 / S288c) GN=SAM4 PE=1 SV=1 - [SAM4_YEAST]	86.1799	41.85	13	25	29.5071	1.38±0.08	0.0160173
P50094	IMD4	Inosine-5'-monophosphate dehydrogenase 4 OS=Saccharomyces cerevisiae (strain ATCC 204508 / S288c) GN=IMD4 PE=1 SV=1 - [IMDH4_YEAST]	427.363	46.37	14	124	31.4175	1.38±0.03	0.00236837
P15565	TRM1	tRNA (guanine(26)-N(2))-dimethyltransferase, mitochondrial OS=Saccharomyces cerevisiae (strain ATCC 204508 / S288c) GN=TRM1 PE=1 SV=1 - [TRM1_YEAST]	51.0235	25.79	11	16	16.7901	1.38±0.05	0.00636278
P47006	RPA34	DNA-directed RNA polymerase I subunit RPA34 OS=Saccharomyces cerevisiae (strain ATCC 204508 / S288c) GN=RPA34 PE=1 SV=1 - [RPA34_YEAST]	29.32	19.74	6	10	17.4397	1.38±0.06	0.00851134
P38998	LYS1	Saccharopine dehydrogenase [NAD(+), L-lysine-forming] OS=Saccharomyces cerevisiae (strain ATCC 204508 / S288c) GN=LYS1 PE=1 SV=3 - [LYS1_YEAST]	65.7614	37.27	12	22	29.525	1.37±0.05	0.00571662
P53920	NMA111	Pro-apoptotic serine protease NMA111 OS=Saccharomyces cerevisiae (strain ATCC 204508 / S288c) GN=NMA111 PE=1 SV=1 - [NM111_YEAST]	44.5681	16.55	13	15	14.9417	1.37±0.03	0.00157315
Q02776	TIM50	Mitochondrial import inner membrane translocase subunit TIM50 OS=Saccharomyces cerevisiae (strain ATCC 204508 / S288c) GN=TIM50 PE=1 SV=1 - [TIM50_YEAST]	64.8521	21.01	9	21	22.1119	1.37±0.05	0.00681299
P53743	ESF2	Pre-rRNA-processing protein ESF2 OS=Saccharomyces cerevisiae (strain ATCC 204508 / S288c) GN=ESF2 PE=1 SV=1 - [ESF2_YEAST]	10.9467	12.66	4	4	9.51876	1.37±0.06	0.00922259
P38910	HSP10	10 kDa heat shock protein, mitochondrial OS=Saccharomyces cerevisiae (strain ATCC 204508 / S288c) GN=HSP10 PE=1 SV=1 - [CH10_YEAST]	257.172	70.75	9	72	23.5965	1.37±0.07	0.0107511
P27515	URK1	Uridine kinase OS=Saccharomyces cerevisiae (strain ATCC 204508 / S288c) GN=URK1 PE=1 SV=1 - [URK1_YEAST]	17.8426	12.57	4	5	20.5545	1.36±0.05	0.00528927
P52910	ACS2	Acetyl-coenzyme A synthetase 2 OS=Saccharomyces cerevisiae (strain ATCC 204508 / S288c) GN=ACS2 PE=1 SV=1 - [ACS2_YEAST]	290.401	45.24	29	88	29.9731	1.36±0.05	0.00630938
Q06631	BFR2	Protein BFR2 OS=Saccharomyces cerevisiae (strain ATCC 204508 / S288c) GN=BFR2 PE=1 SV=1 - [BFR2_YEAST]	48.4707	29.59	11	15	25.2091	1.36±0.07	0.0110747
P28000	RPC19	DNA-directed RNA polymerases I and III subunit RPAC2 OS=Saccharomyces cerevisiae (strain ATCC 204508 / S288c) GN=RPC19 PE=1 SV=1 - [RPAC2_YEAST]	102.176	83.8	8	28	21.8595	1.36±0.08	0.0155322
P05626	ATP4	ATP synthase subunit 4, mitochondrial OS=Saccharomyces cerevisiae (strain ATCC 204508 / S288c) GN=ATP4 PE=1 SV=2 - [ATPF_YEAST]	156.818	43.03	13	47	32.9951	1.36±0.06	0.00970137
P47045	TIM54	Mitochondrial import inner membrane translocase subunit TIM54 OS=Saccharomyces cerevisiae (strain ATCC 204508 / S288c) GN=TIM54 PE=1 SV=1 - [TIM54_YEAST]	17.996	19.46	6	6	12.4056	1.35±0.07	0.011764
P07256	COR1	Cytochrome b-c1 complex subunit 1, mitochondrial OS=Saccharomyces cerevisiae (strain ATCC 204508 / S288c) GN=COR1 PE=1 SV=1 - [QCR1_YEAST]	231.316	53.17	22	69	32.9857	1.35±0.1	0.0265423
P07342	ILV2	Acetolactate synthase catalytic subunit, mitochondrial OS=Saccharomyces cerevisiae (strain ATCC 204508 / S288c) GN=ILV2 PE=1 SV=1 - [ILVB_YEAST]	218.941	44.25	22	68	32.5241	1.35±0.1	0.027074
P52893	ALT1	Probable alanine aminotransferase, mitochondrial OS=Saccharomyces cerevisiae (strain ATCC 204508 / S288c) GN=ALT1 PE=1 SV=1 - [ALAM_YEAST]	81.3984	27.03	10	22	20.5842	1.35±0.08	0.017696
P39727	ERV46	ER-derived vesicles protein ERV46 OS=Saccharomyces cerevisiae (strain ATCC 204508 / S288c) GN=ERV46 PE=1 SV=2 - [ERV46_YEAST]	9.40226	5.78	2	3	36.4997	1.35±0.13	0.0439479
Q12017	PLP2	Phosducin-like protein 2 OS=Saccharomyces cerevisiae (strain ATCC 204508 / S288c) GN=PLP2 PE=1 SV=1 - [PLP2_YEAST]	43.1414	34.97	7	14	23.3277	1.35±0.06	0.00919695
P40558	CFD1	Cytosolic Fe-S cluster assembly factor CFD1 OS=Saccharomyces cerevisiae (strain ATCC 204508 / S288c) GN=CFD1 PE=1 SV=1 - [CFD1_YEAST]	5.58077	9.56	2	2	13.7314	1.35±0.03	0.00227793
P38861	NMD3	60S ribosomal export protein NMD3 OS=Saccharomyces cerevisiae (strain ATCC 204508 / S288c) GN=NMD3 PE=1 SV=3 - [NMD3_YEAST]	53.865	24.13	10	17	22.0554	1.35±0.02	0.00171611
P33399	LHP1	La protein homolog OS=Saccharomyces cerevisiae (strain ATCC 204508 / S288c) GN=LHP1 PE=1 SV=2 - [LHP1_YEAST]	81.0375	39.27	10	23	23.495	1.34±0.04	0.00463
P39002	FAA3	Long-chain-fatty-acid--CoA ligase 3 OS=Saccharomyces cerevisiae (strain ATCC 204508 / S288c) GN=FAA3 PE=1 SV=1 - [LCF3_YEAST]	40.2949	11.67	6	13	17.9084	1.34±0.02	0.000961007
P36008	TEF4	Elongation factor 1-gamma 2 OS=Saccharomyces cerevisiae (strain ATCC 204508 / S288c) GN=TEF4 PE=1 SV=1 - [EF1G2_YEAST]	234.646	42.72	18	75	18.1252	1.34±0.05	0.00704248
Q99216	PNO1	Pre-rRNA-processing protein PNO1 OS=Saccharomyces cerevisiae (strain ATCC 204508 / S288c) GN=PNO1 PE=1 SV=1 - [PNO1_YEAST]	22.216	22.63	5	7	25.8903	1.34±0.03	0.00293835
P38883	RIX1	Pre-rRNA-processing protein RIX1 OS=Saccharomyces cerevisiae (strain ATCC 204508 / S288c) GN=RIX1 PE=1 SV=2 - [RIX1_YEAST]	18.9845	12.19	6	6	20.0518	1.34±0.09	0.0212175
P09368	PUT1	Proline dehydrogenase, mitochondrial OS=Saccharomyces cerevisiae (strain ATCC 204508 / S288c) GN=PUT1 PE=1 SV=2 - [PUT1_YEAST]	13.9255	9.66	4	5	9.20642	1.34±0.02	0.000702699
P53261	NOP7	Pescadillo homolog OS=Saccharomyces cerevisiae (strain ATCC 204508 / S288c) GN=NOP7 PE=1 SV=1 - [PESC_YEAST]	60.5402	20.33	12	19	18.9128	1.34±0.11	0.0325469
P37838	NOP4	Nucleolar protein 4 OS=Saccharomyces cerevisiae (strain ATCC 204508 / S288c) GN=NOP4 PE=1 SV=1 - [NOP4_YEAST]	30.0586	13.14	6	9	18.7855	1.34±0.09	0.020101
P40414	TPM2	Tropomyosin-2 OS=Saccharomyces cerevisiae (strain ATCC 204508 / S288c) GN=TPM2 PE=1 SV=1 - [TPM2_YEAST]	173.587	84.47	21	49	17.062	1.34±0.13	0.0470555
Q12314	SFM1	Protein arginine N-methyltransferase SFM1 OS=Saccharomyces cerevisiae (strain ATCC 204508 / S288c) GN=SFM1 PE=1 SV=1 - [SFM1_YEAST]	117.999	67.14	15	35	18.6353	1.34±0.07	0.0119914
P37293	NAT2	Putative N-terminal acetyltransferase 2 OS=Saccharomyces cerevisiae (strain ATCC 204508 / S288c) GN=NAT2 PE=1 SV=2 - [NAT2_YEAST]	12.4727	8.68	3	4	11.1291	1.34±0.08	0.0165639
P81450	ATP18	ATP synthase subunit J, mitochondrial OS=Saccharomyces cerevisiae (strain ATCC 204508 / S288c) GN=ATP18 PE=1 SV=1 - [ATP18_YEAST]	27.1567	28.81	3	9	38.7499	1.34±0.09	0.0233683
P15454	GUK1	Guanylate kinase OS=Saccharomyces cerevisiae (strain ATCC 204508 / S288c) GN=GUK1 PE=1 SV=2 - [KGUA_YEAST]	227.386	76.47	16	65	24.5748	1.34±0.08	0.0170638
P07259	URA2	Protein URA2 OS=Saccharomyces cerevisiae (strain ATCC 204508 / S288c) GN=URA2 PE=1 SV=5 - [PYR1_YEAST]	1393.8	53.52	116	422	29.5076	1.34±0.06	0.00939691
P39926	SSO2	Protein SSO2 OS=Saccharomyces cerevisiae (strain ATCC 204508 / S288c) GN=SSO2 PE=1 SV=2 - [SSO2_YEAST]	14.7747	12.2	2	5	20.914	1.34±0.11	0.032848
Q12389	DBP10	ATP-dependent RNA helicase DBP10 OS=Saccharomyces cerevisiae (strain ATCC 204508 / S288c) GN=DBP10 PE=1 SV=2 - [DBP10_YEAST]	23.4554	8.64	6	8	18.0408	1.33±0.03	0.00214979
P38074	HMT1	Protein arginine N-methyltransferase 1 OS=Saccharomyces cerevisiae (strain ATCC 204508 / S288c) GN=HMT1 PE=1 SV=1 - [HMT1_YEAST]	51.7393	36.78	11	16	13.132	1.33±0.05	0.00603102
P07257	QCR2	Cytochrome b-c1 complex subunit 2, mitochondrial OS=Saccharomyces cerevisiae (strain ATCC 204508 / S288c) GN=QCR2 PE=1 SV=1 - [QCR2_YEAST]	456.822	73.37	33	124	21.1591	1.33±0.03	0.00250772
Q12149	RRP6	Exosome complex exonuclease RRP6 OS=Saccharomyces cerevisiae (strain ATCC 204508 / S288c) GN=RRP6 PE=1 SV=1 - [RRP6_YEAST]	37.1288	13.64	7	11	25.1584	1.33±0.1	0.0291307
P20448	HCA4	ATP-dependent RNA helicase HCA4 OS=Saccharomyces cerevisiae (strain ATCC 204508 / S288c) GN=HCA4 PE=1 SV=2 - [DBP4_YEAST]	44.404	17.01	8	14	25.6486	1.33±0.08	0.0177213
P53913	FYV6	Protein FYV6 OS=Saccharomyces cerevisiae (strain ATCC 204508 / S288c) GN=FYV6 PE=1 SV=1 - [FYV6_YEAST]	12.1085	19.08	3	4	10.5369	1.33±0.09	0.0247247
P09064	SUI3	Eukaryotic translation initiation factor 2 subunit beta OS=Saccharomyces cerevisiae (strain ATCC 204508 / S288c) GN=SUI3 PE=1 SV=2 - [IF2B_YEAST]	125.47	50.18	18	39	23.6312	1.33±0.07	0.0154243
O14468	YOR304C-A	Uncharacterized protein YOR304C-A OS=Saccharomyces cerevisiae (strain ATCC 204508 / S288c) GN=YOR304C-A PE=1 SV=1 - [YO304_YEAST]	8.45428	38.16	2	3	21.678	1.33±0.1	0.0291411
P38264	PHO88	SRP-independent targeting protein 3 OS=Saccharomyces cerevisiae (strain ATCC 204508 / S288c) GN=PHO88 PE=1 SV=1 - [PHO88_YEAST]	74.9134	43.09	9	23	28.389	1.33±0.05	0.0069456
Q12000	TMA46	Translation machinery-associated protein 46 OS=Saccharomyces cerevisiae (strain ATCC 204508 / S288c) GN=TMA46 PE=1 SV=2 - [TMA46_YEAST]	34.4329	24.93	6	11	24.2507	1.33±0.1	0.0302605
Q01080	RPA49	DNA-directed RNA polymerase I subunit RPA49 OS=Saccharomyces cerevisiae (strain ATCC 204508 / S288c) GN=RPA49 PE=1 SV=2 - [RPA49_YEAST]	93.1151	34.94	11	27	21.1083	1.33±0.06	0.0114107
P53874	UBP10	Ubiquitin carboxyl-terminal hydrolase 10 OS=Saccharomyces cerevisiae (strain ATCC 204508 / S288c) GN=UBP10 PE=1 SV=2 - [UBP10_YEAST]	11.4182	6.44	4	4	16.4748	1.33±0.07	0.0153515
Q3E7B7	YDL085C-A	SERF-like protein YDL085C-A OS=Saccharomyces cerevisiae (strain ATCC 204508 / S288c) GN=YDL085C-A PE=1 SV=1 - [YD85C_YEAST]	8.40797	14.71	2	3	10.6522	1.33±0.01	0.000100024
Q02792	RAT1	5'-3' exoribonuclease 2 OS=Saccharomyces cerevisiae (strain ATCC 204508 / S288c) GN=RAT1 PE=1 SV=3 - [XRN2_YEAST]	17.577	6.86	6	6	15.011	1.33±0.06	0.0100801
P54115	ALD6	Magnesium-activated aldehyde dehydrogenase, cytosolic OS=Saccharomyces cerevisiae (strain ATCC 204508 / S288c) GN=ALD6 PE=1 SV=4 - [ALDH6_YEAST]	862.956	79.6	38	242	27.1379	1.33±0.03	0.00336904
P38197	YBL036C	UPF0001 protein YBL036C OS=Saccharomyces cerevisiae (strain ATCC 204508 / S288c) GN=YBL036C PE=1 SV=1 - [YBD6_YEAST]	97.2014	61.48	14	31	23.5202	1.32±0.07	0.0146054
P39103	COX14	Cytochrome c oxidase assembly protein COX14 OS=Saccharomyces cerevisiae (strain ATCC 204508 / S288c) GN=COX14 PE=1 SV=1 - [COX14_YEAST]	12.1264	40	3	4	30.4533	1.32±0.03	0.00353151
Q02892	NOG1	Nucleolar GTP-binding protein 1 OS=Saccharomyces cerevisiae (strain ATCC 204508 / S288c) GN=NOG1 PE=1 SV=1 - [NOG1_YEAST]	61.06	21.79	11	19	14.6	1.32±0.05	0.00729563
P53251	SLX9	Ribosome biogenesis protein SLX9 OS=Saccharomyces cerevisiae (strain ATCC 204508 / S288c) GN=SLX9 PE=1 SV=1 - [SLX9_YEAST]	10.9893	29.52	4	4	13.5216	1.32±0.09	0.0252282
P19073	CDC42	Cell division control protein 42 OS=Saccharomyces cerevisiae (strain ATCC 204508 / S288c) GN=CDC42 PE=1 SV=2 - [CDC42_YEAST]	60.8177	24.61	5	18	19.5573	1.32±0.05	0.00745025
Q02784	GRX5	Monothiol glutaredoxin-5, mitochondrial OS=Saccharomyces cerevisiae (strain ATCC 204508 / S288c) GN=GRX5 PE=1 SV=1 - [GLRX5_YEAST]	105.91	68.67	8	33	16.7667	1.32±0.05	0.00690268
Q07844	RIX7	Ribosome biogenesis ATPase RIX7 OS=Saccharomyces cerevisiae (strain ATCC 204508 / S288c) GN=RIX7 PE=1 SV=1 - [RIX7_YEAST]	56.6888	24.01	15	19	17.9725	1.32±0.04	0.00459103
Q12754	RRP12	Ribosomal RNA-processing protein 12 OS=Saccharomyces cerevisiae (strain ATCC 204508 / S288c) GN=RRP12 PE=1 SV=1 - [RRP12_YEAST]	66.9144	13.19	12	20	17.1391	1.32±0.04	0.0060013
P17536	TPM1	Tropomyosin-1 OS=Saccharomyces cerevisiae (strain ATCC 204508 / S288c) GN=TPM1 PE=1 SV=1 - [TPM1_YEAST]	349.174	89.95	33	98	21.7651	1.32±0.12	0.0439571
P32897	TIM23	Mitochondrial import inner membrane translocase subunit TIM23 OS=Saccharomyces cerevisiae (strain ATCC 204508 / S288c) GN=TIM23 PE=1 SV=1 - [TIM23_YEAST]	15.4131	27.93	3	5	30.4627	1.32±0.09	0.0255268
P53313	SDA1	Protein SDA1 OS=Saccharomyces cerevisiae (strain ATCC 204508 / S288c) GN=SDA1 PE=1 SV=1 - [SDA1_YEAST]	26.2557	12.26	6	9	28.1449	1.32±0.04	0.00473247
Q06679	UTP4	U3 small nucleolar RNA-associated protein 4 OS=Saccharomyces cerevisiae (strain ATCC 204508 / S288c) GN=UTP4 PE=1 SV=1 - [UTP4_YEAST]	48.68	22.16	13	15	10.1333	1.32±0.03	0.00320181
P32264	PRO1	Glutamate 5-kinase OS=Saccharomyces cerevisiae (strain ATCC 204508 / S288c) GN=PRO1 PE=1 SV=2 - [PROB_YEAST]	94.3638	48.13	16	30	17.219	1.31±0.04	0.00551487
P53981	YNL010W	Uncharacterized phosphatase YNL010W OS=Saccharomyces cerevisiae (strain ATCC 204508 / S288c) GN=YNL010W PE=1 SV=1 - [YNB0_YEAST]	165.61	59.34	18	50	17.579	1.31±0.08	0.0202913
P0CW40	IMA3	Oligo-1,6-glucosidase IMA3 OS=Saccharomyces cerevisiae (strain ATCC 204508 / S288c) GN=IMA3 PE=1 SV=1 - [MALX2_YEAST]	14.9496	12.73	5	5	17.7223	1.31±0.08	0.0231234
P47083	MPP10	U3 small nucleolar RNA-associated protein MPP10 OS=Saccharomyces cerevisiae (strain ATCC 204508 / S288c) GN=MPP10 PE=1 SV=1 - [MPP10_YEAST]	65.99	24.28	14	21	15.8444	1.31±0.05	0.00799541
P20436	RPB8	DNA-directed RNA polymerases I, II, and III subunit RPABC3 OS=Saccharomyces cerevisiae (strain ATCC 204508 / S288c) GN=RPB8 PE=1 SV=1 - [RPAB3_YEAST]	26.4894	33.56	3	7	18.7718	1.31±0.09	0.0279067
Q05942	RSA3	Ribosome assembly protein 3 OS=Saccharomyces cerevisiae (strain ATCC 204508 / S288c) GN=RSA3 PE=1 SV=1 - [RSA3_YEAST]	8.53988	15.91	3	3	13.058	1.31±0.12	0.0463817
P48570	LYS20	Homocitrate synthase, cytosolic isozyme OS=Saccharomyces cerevisiae (strain ATCC 204508 / S288c) GN=LYS20 PE=1 SV=1 - [HOSC_YEAST]	315.25	58.41	10	92	20.7717	1.31±0.04	0.00487221
Q08971	YPL225W	Protein PBDC1 homolog OS=Saccharomyces cerevisiae (strain ATCC 204508 / S288c) GN=YPL225W PE=1 SV=1 - [YP225_YEAST]	120.954	79.45	15	38	18.1718	1.31±0.07	0.0157654
P20051	URA4	Dihydroorotase OS=Saccharomyces cerevisiae (strain ATCC 204508 / S288c) GN=URA4 PE=1 SV=2 - [PYRC_YEAST]	139.93	35.44	11	42	36.9984	1.31±0.04	0.0069744
P32477	GSH1	Glutamate--cysteine ligase OS=Saccharomyces cerevisiae (strain ATCC 204508 / S288c) GN=GSH1 PE=1 SV=1 - [GSH1_YEAST]	28.5423	13.27	6	9	9.84223	1.31±0.03	0.00315789
P28241	IDH2	Isocitrate dehydrogenase [NAD] subunit 2, mitochondrial OS=Saccharomyces cerevisiae (strain ATCC 204508 / S288c) GN=IDH2 PE=1 SV=1 - [IDH2_YEAST]	270.009	47.7	16	79	17.5311	1.3±0.08	0.0224557
P17121	SAC7	GTPase-activating protein SAC7 OS=Saccharomyces cerevisiae (strain ATCC 204508 / S288c) GN=SAC7 PE=1 SV=2 - [SAC7_YEAST]	8.88446	6.12	2	3	46.601	1.3±0.07	0.0167467
P38344	REI1	Cytoplasmic 60S subunit biogenesis factor REI1 OS=Saccharomyces cerevisiae (strain ATCC 204508 / S288c) GN=REI1 PE=1 SV=3 - [REI1_YEAST]	8.41789	10.43	3	3	23.6214	1.3±0.11	0.0435266
P38625	GUA1	GMP synthase [glutamine-hydrolyzing] OS=Saccharomyces cerevisiae (strain ATCC 204508 / S288c) GN=GUA1 PE=1 SV=4 - [GUAA_YEAST]	333.723	54.67	33	97	25.8899	1.3±0.01	0.00048912
Q06214	JIP5	WD repeat-containing protein JIP5 OS=Saccharomyces cerevisiae (strain ATCC 204508 / S288c) GN=JIP5 PE=1 SV=2 - [JIP5_YEAST]	21.7927	14.02	5	7	18.7323	1.3±0.06	0.0109531
P53877	IPI3	Pre-rRNA-processing protein IPI3 OS=Saccharomyces cerevisiae (strain ATCC 204508 / S288c) GN=IPI3 PE=1 SV=1 - [IPI3_YEAST]	31.6675	22.88	10	10	15.4302	1.3±0.03	0.00294945
Q04500	UTP14	U3 small nucleolar RNA-associated protein 14 OS=Saccharomyces cerevisiae (strain ATCC 204508 / S288c) GN=UTP14 PE=1 SV=1 - [UTP14_YEAST]	43.3839	20.58	13	14	25.7216	1.3±0.05	0.00745083
Q3E7A3	YJL133C-A	Uncharacterized protein YJL133C-A OS=Saccharomyces cerevisiae (strain ATCC 204508 / S288c) GN=YJL133C-A PE=1 SV=1 - [YJ133_YEAST]	34.8176	47.3	5	11	14.5398	1.3±0.07	0.0170544
P27637	BUD14	Bud site selection protein 14 OS=Saccharomyces cerevisiae (strain ATCC 204508 / S288c) GN=BUD14 PE=1 SV=4 - [BUD14_YEAST]	13.5334	4.09	2	4	12.3875	1.3±0.05	0.00978219
P39979	HPA3	D-amino-acid N-acetyltransferase HPA3 OS=Saccharomyces cerevisiae (strain ATCC 204508 / S288c) GN=HPA3 PE=1 SV=2 - [HPA3_YEAST]	20.5059	34.16	6	7	17.5082	1.3±0.04	0.00726289
Score stands for the protein score which is the sum of the scores of the individual peptides generated by PD 1.4.
PSMs stands for total number of spectra used for identification.
Unique Peptides stands for the number of unique peptides used for identification of an specific protein.
Variability [%] stands for variability of reporter ion ratios of unique peptides assigned to each protein.
Mean Ratio ± SD stands for the mean of protein ratios taken from three biological replicates.
p-value stands for the measure of significance.

## Sheet: Table S2
Table S2. The list of downregulated proteins in grx1△.
Accession	Gene Name	Description	Score	Coverage	Unique Peptides	PSMs	Variability	Mean Ratio ± SD	p-value
P38137	PCS60	Peroxisomal-coenzyme A synthetase OS=Saccharomyces cerevisiae (strain ATCC 204508 / S288c) GN=PCS60 PE=1 SV=1 - [FAT2_YEAST]	230.941	52.3	26	72	21.2761	0.77±0.05	0.0182254
P38884	AIM18	Altered inheritance of mitochondria protein 18, mitochondrial OS=Saccharomyces cerevisiae (strain ATCC 204508 / S288c) GN=AIM18 PE=1 SV=1 - [AIM18_YEAST]	26.4415	18.07	5	9	13.0252	0.77±0.04	0.00801832
Q03210	NGL3	Probable RNA exonuclease NGL3 OS=Saccharomyces cerevisiae (strain ATCC 204508 / S288c) GN=NGL3 PE=1 SV=1 - [NGL3_YEAST]	13.8921	10.3	3	4	20.8353	0.77±0.03	0.00466889
P40344	ATG3	Autophagy-related protein 3 OS=Saccharomyces cerevisiae (strain ATCC 204508 / S288c) GN=ATG3 PE=1 SV=1 - [ATG3_YEAST]	11.0406	12.9	4	4	18.5615	0.77±0.06	0.0190467
P21801	SDH2	Succinate dehydrogenase [ubiquinone] iron-sulfur subunit, mitochondrial OS=Saccharomyces cerevisiae (strain ATCC 204508 / S288c) GN=SDH2 PE=1 SV=1 - [SDHB_YEAST]	201.721	56.02	15	58	22.8985	0.76±0.03	0.00702323
P40530	PKP1	[Pyruvate dehydrogenase (acetyl-transferring)] kinase 1, mitochondrial OS=Saccharomyces cerevisiae (strain ATCC 204508 / S288c) GN=PKP1 PE=1 SV=1 - [PDK1_YEAST]	6.31622	6.6	2	2	9.04971	0.76±0.02	0.00260294
Q04409	EMI2	Putative glucokinase-2 OS=Saccharomyces cerevisiae (strain ATCC 204508 / S288c) GN=EMI2 PE=1 SV=1 - [EMI2_YEAST]	242.306	51.2	24	75	23.4626	0.76±0.01	0.000428042
P40363	YJL068C	S-formylglutathione hydrolase OS=Saccharomyces cerevisiae (strain ATCC 204508 / S288c) GN=YJL068C PE=1 SV=1 - [SFGH_YEAST]	96.4683	39.46	12	29	25.5869	0.76±0.02	0.001394
P02293	HTB1	Histone H2B.1 OS=Saccharomyces cerevisiae (strain ATCC 204508 / S288c) GN=HTB1 PE=1 SV=2 - [H2B1_YEAST]	147.244	47.33	8	48	22.0477	0.76±0.06	0.0173712
P10080	SBP1	Single-stranded nucleic acid-binding protein OS=Saccharomyces cerevisiae (strain ATCC 204508 / S288c) GN=SBP1 PE=1 SV=2 - [SSBP1_YEAST]	223.297	48.3	14	61	24.5449	0.76±0.04	0.011367
P32807	YKU70	ATP-dependent DNA helicase II subunit 1 OS=Saccharomyces cerevisiae (strain ATCC 204508 / S288c) GN=YKU70 PE=1 SV=2 - [KU70_YEAST]	8.18754	7.97	3	3	6.72354	0.76±0.05	0.0150854
P53094	MDS3	Negative regulator of sporulation MDS3 OS=Saccharomyces cerevisiae (strain ATCC 204508 / S288c) GN=MDS3 PE=1 SV=2 - [MDS3_YEAST]	35.8954	11.97	11	13	16.7022	0.76±0.02	0.00301943
Q07451	YET3	Endoplasmic reticulum transmembrane protein 3 OS=Saccharomyces cerevisiae (strain ATCC 204508 / S288c) GN=YET3 PE=1 SV=1 - [YET3_YEAST]	18.1889	19.21	4	6	27.441	0.76±0.05	0.011925
P50089	YGR237C	Uncharacterized protein YGR237C OS=Saccharomyces cerevisiae (strain ATCC 204508 / S288c) GN=YGR237C PE=1 SV=1 - [YG51_YEAST]	11.3486	4.33	2	4	11.687	0.76±0.06	0.0180632
P36106	BYE1	Transcription factor BYE1 OS=Saccharomyces cerevisiae (strain ATCC 204508 / S288c) GN=BYE1 PE=1 SV=1 - [BYE1_YEAST]	21.2117	11.45	5	7	15.5279	0.76±0.03	0.00474471
O14455	RPL36B	60S ribosomal protein L36-B OS=Saccharomyces cerevisiae (strain ATCC 204508 / S288c) GN=RPL36B PE=1 SV=3 - [RL36B_YEAST]	142.791	50	2	47	24.9619	0.76±0.03	0.00368586
P38862	ATG7	Ubiquitin-like modifier-activating enzyme ATG7 OS=Saccharomyces cerevisiae (strain ATCC 204508 / S288c) GN=ATG7 PE=1 SV=1 - [ATG7_YEAST]	16.9647	12.38	6	6	24.0096	0.76±0.08	0.0314041
P30952	MLS1	Malate synthase 1, glyoxysomal OS=Saccharomyces cerevisiae (strain ATCC 204508 / S288c) GN=MLS1 PE=1 SV=1 - [MASY_YEAST]	445.056	46.39	28	132	32.1217	0.76±0.02	0.00205088
Q12331	YDR262W	FAS1 domain-containing protein YDR262W OS=Saccharomyces cerevisiae (strain ATCC 204508 / S288c) GN=YDR262W PE=1 SV=1 - [YFAS1_YEAST]	26.6108	30.51	6	8	17.5169	0.76±0.04	0.0101022
P32643	TMT1	Trans-aconitate 3-methyltransferase OS=Saccharomyces cerevisiae (strain ATCC 204508 / S288c) GN=TMT1 PE=1 SV=1 - [TMT1_YEAST]	21.3749	27.09	7	7	29.1931	0.76±0.03	0.00530366
P36010	YNK1	Nucleoside diphosphate kinase OS=Saccharomyces cerevisiae (strain ATCC 204508 / S288c) GN=YNK1 PE=1 SV=1 - [NDK_YEAST]	173.382	67.97	11	49	18.8993	0.75±0.02	0.00264087
P32524	PRP21	Pre-mRNA-splicing factor PRP21 OS=Saccharomyces cerevisiae (strain ATCC 204508 / S288c) GN=PRP21 PE=1 SV=1 - [PRP21_YEAST]	5.83388	13.93	2	2	19.3858	0.75±0.07	0.0224428
P40308	TGL3	Lipase 3 OS=Saccharomyces cerevisiae (strain ATCC 204508 / S288c) GN=TGL3 PE=1 SV=2 - [TGL3_YEAST]	10.5944	8.41	3	3	26.671	0.75±0.06	0.0165169
P43565	RIM15	Serine/threonine-protein kinase RIM15 OS=Saccharomyces cerevisiae (strain ATCC 204508 / S288c) GN=RIM15 PE=1 SV=1 - [RIM15_YEAST]	7.88391	3.16	3	3	17.5834	0.75±0.05	0.0135458
Q3E756	YBL029C-A	UPF0768 protein YBL029C-A OS=Saccharomyces cerevisiae (strain ATCC 204508 / S288c) GN=YBL029C-A PE=1 SV=1 - [YB029_YEAST]	10.2502	21.28	2	4	5.82472	0.75±0.01	0.000588129
Q03833	GIS1	Transcriptional activator/repressor GIS1 OS=Saccharomyces cerevisiae (strain ATCC 204508 / S288c) GN=GIS1 PE=1 SV=1 - [GIS1_YEAST]	28.6113	13.65	8	10	20.8532	0.74±0.02	0.0023897
Q06108	RGC1	Regulator of the glycerol channel 1 OS=Saccharomyces cerevisiae (strain ATCC 204508 / S288c) GN=RGC1 PE=1 SV=1 - [RGC1_YEAST]	16.6318	5.91	5	6	26.9924	0.74±0.01	0.000439425
P53076	VID30	Vacuolar import and degradation protein 30 OS=Saccharomyces cerevisiae (strain ATCC 204508 / S288c) GN=VID30 PE=1 SV=1 - [VID30_YEAST]	45.3756	14.93	10	15	20.7969	0.74±0.03	0.00398106
P38276	YBR137W	UPF0303 protein YBR137W OS=Saccharomyces cerevisiae (strain ATCC 204508 / S288c) GN=YBR137W PE=1 SV=4 - [YBY7_YEAST]	24.6397	25.14	3	6	27.5778	0.74±0.01	0.000606638
P40008	FMP52	Protein FMP52, mitochondrial OS=Saccharomyces cerevisiae (strain ATCC 204508 / S288c) GN=FMP52 PE=1 SV=1 - [FMP52_YEAST]	68.8439	45.02	10	22	17.3329	0.74±0.06	0.0171084
Q12008	GPM2	Phosphoglycerate mutase 2 OS=Saccharomyces cerevisiae (strain ATCC 204508 / S288c) GN=GPM2 PE=1 SV=1 - [PMG2_YEAST]	45.5914	36.33	8	14	19.3981	0.74±0	8.41639e-05
Q01574	ACS1	Acetyl-coenzyme A synthetase 1 OS=Saccharomyces cerevisiae (strain ATCC 204508 / S288c) GN=ACS1 PE=1 SV=2 - [ACS1_YEAST]	846.181	57.08	44	240	25.887	0.74±0.08	0.0277283
P22517	CMK2	Calcium/calmodulin-dependent protein kinase II OS=Saccharomyces cerevisiae (strain ATCC 204508 / S288c) GN=CMK2 PE=1 SV=2 - [KCC2_YEAST]	73.1179	37.36	16	22	14.3725	0.74±0.03	0.00460489
P54838	DAK1	Dihydroxyacetone kinase 1 OS=Saccharomyces cerevisiae (strain ATCC 204508 / S288c) GN=DAK1 PE=1 SV=1 - [DAK1_YEAST]	342.769	61.47	33	103	18.3384	0.74±0.02	0.00219662
Q06321	ATG26	Sterol 3-beta-glucosyltransferase OS=Saccharomyces cerevisiae (strain ATCC 204508 / S288c) GN=ATG26 PE=1 SV=1 - [ATG26_YEAST]	36.3811	10.68	10	12	13.0822	0.74±0.03	0.0041609
P29547	CAM1	Elongation factor 1-gamma 1 OS=Saccharomyces cerevisiae (strain ATCC 204508 / S288c) GN=CAM1 PE=1 SV=2 - [EF1G1_YEAST]	230.633	53.01	19	72	23.6591	0.74±0.04	0.00746322
P43682	SFT1	Protein transport protein SFT1 OS=Saccharomyces cerevisiae (strain ATCC 204508 / S288c) GN=SFT1 PE=1 SV=1 - [SFT1_YEAST]	5.86794	8.25	2	2	12.527	0.74±0.01	0.000231156
P25649	AHC2	ADA histone acetyltransferase complex component 2 OS=Saccharomyces cerevisiae (strain ATCC 204508 / S288c) GN=AHC2 PE=1 SV=1 - [AHC2_YEAST]	5.42258	16.41	2	2	10.4775	0.74±0.03	0.00485051
Q3E846	COA6	Cytochrome c oxidase assembly factor 6 OS=Saccharomyces cerevisiae (strain ATCC 204508 / S288c) GN=COA6 PE=1 SV=1 - [COA6_YEAST]	34.1801	39.42	4	11	26.2276	0.73±0.03	0.00467556
P10963	PCK1	Phosphoenolpyruvate carboxykinase (ATP) OS=Saccharomyces cerevisiae (strain ATCC 204508 / S288c) GN=PCK1 PE=1 SV=2 - [PCKA_YEAST]	1734.92	71.58	39	499	28.5479	0.73±0.04	0.00786713
P23180	AIM17	Probable oxidoreductase AIM17 OS=Saccharomyces cerevisiae (strain ATCC 204508 / S288c) GN=AIM17 PE=1 SV=2 - [AIM17_YEAST]	118.588	44.09	17	36	25.0621	0.73±0.04	0.00796152
P39994	YEL020C	Putative 2-hydroxyacyl-CoA lyase OS=Saccharomyces cerevisiae (strain ATCC 204508 / S288c) GN=YEL020C PE=1 SV=1 - [YEC0_YEAST]	53.5708	25.18	10	18	21.747	0.73±0.06	0.0187966
P40219	OSW5	Outer spore wall protein 5 OS=Saccharomyces cerevisiae (strain ATCC 204508 / S288c) GN=OSW5 PE=1 SV=1 - [OSW5_YEAST]	23.9808	18.92	2	7	22.3392	0.73±0.04	0.00732426
P13185	KIN1	Serine/threonine protein kinase KIN1 OS=Saccharomyces cerevisiae (strain ATCC 204508 / S288c) GN=KIN1 PE=1 SV=3 - [KIN1_YEAST]	72.464	26.13	19	23	17.3785	0.73±0.03	0.00407111
Q02486	ABF2	ARS-binding factor 2, mitochondrial OS=Saccharomyces cerevisiae (strain ATCC 204508 / S288c) GN=ABF2 PE=1 SV=1 - [ABF2_YEAST]	107.894	58.47	17	34	23.507	0.73±0.05	0.0120156
P00425	COX5B	Cytochrome c oxidase polypeptide 5B, mitochondrial OS=Saccharomyces cerevisiae (strain ATCC 204508 / S288c) GN=COX5B PE=1 SV=3 - [COX5B_YEAST]	21.7007	33.11	3	7	9.6255	0.73±0.02	0.00153009
Q04279	SEG1	Eisosome protein SEG1 OS=Saccharomyces cerevisiae (strain ATCC 204508 / S288c) GN=SEG1 PE=1 SV=1 - [SEG1_YEAST]	52.275	18.13	13	16	19.5171	0.73±0.06	0.0173786
P38815	YPT35	PX domain-containing protein YPT35 OS=Saccharomyces cerevisiae (strain ATCC 204508 / S288c) GN=YPT35 PE=1 SV=1 - [YPT35_YEAST]	6.43025	10.28	2	2	26.2717	0.73±0.04	0.00549654
Q12451	OSH2	Oxysterol-binding protein homolog 2 OS=Saccharomyces cerevisiae (strain ATCC 204508 / S288c) GN=OSH2 PE=1 SV=1 - [OSH2_YEAST]	95.6266	18.24	19	31	17.8758	0.73±0.02	0.00240945
Q03695	YMR206W	Uncharacterized protein YMR206W OS=Saccharomyces cerevisiae (strain ATCC 204508 / S288c) GN=YMR206W PE=4 SV=1 - [YM58_YEAST]	8.85278	12.14	2	3	9.71452	0.73±0	8.5093e-05
P53037	PSD2	Phosphatidylserine decarboxylase proenzyme 2 OS=Saccharomyces cerevisiae (strain ATCC 204508 / S288c) GN=PSD2 PE=1 SV=1 - [PSD2_YEAST]	6.15737	1.85	2	2	27.3936	0.72±0.06	0.0160389
P29029	CTS1	Endochitinase OS=Saccharomyces cerevisiae (strain ATCC 204508 / S288c) GN=CTS1 PE=1 SV=2 - [CHIT_YEAST]	18.9545	5.87	3	6	22.8887	0.72±0.07	0.0214165
P38821	APE4	Aspartyl aminopeptidase 4 OS=Saccharomyces cerevisiae (strain ATCC 204508 / S288c) GN=APE4 PE=1 SV=1 - [DNPEP_YEAST]	103.348	36.73	15	33	26.3007	0.72±0.03	0.0049374
P25372	TRX3	Thioredoxin-3, mitochondrial OS=Saccharomyces cerevisiae (strain ATCC 204508 / S288c) GN=TRX3 PE=1 SV=1 - [TRX3_YEAST]	49.1523	44.09	7	15	20.1753	0.72±0.04	0.00638425
Q01976	YSA1	ADP-ribose pyrophosphatase OS=Saccharomyces cerevisiae (strain ATCC 204508 / S288c) GN=YSA1 PE=1 SV=2 - [ADPP_YEAST]	64.7384	25.11	5	22	23.528	0.72±0.06	0.0132029
P25623	SYP1	Suppressor of yeast profilin deletion OS=Saccharomyces cerevisiae (strain ATCC 204508 / S288c) GN=SYP1 PE=1 SV=3 - [SYP1_YEAST]	128.246	34.02	23	38	25.4634	0.72±0.02	0.00135567
P25369	LSB5	LAS seventeen-binding protein 5 OS=Saccharomyces cerevisiae (strain ATCC 204508 / S288c) GN=LSB5 PE=1 SV=3 - [LSB5_YEAST]	27.3987	18.64	5	7	12.9361	0.72±0.05	0.0116132
Q12466	TCB1	Tricalbin-1 OS=Saccharomyces cerevisiae (strain ATCC 204508 / S288c) GN=TCB1 PE=1 SV=1 - [TCB1_YEAST]	102.844	22.77	19	30	18.6145	0.72±0.04	0.0071682
P40581	HYR1	Peroxiredoxin HYR1 OS=Saccharomyces cerevisiae (strain ATCC 204508 / S288c) GN=HYR1 PE=1 SV=1 - [GPX3_YEAST]	151.933	50.31	9	50	17.2941	0.72±0.05	0.0105036
P28625	YIM1	Protein YIM1 OS=Saccharomyces cerevisiae (strain ATCC 204508 / S288c) GN=YIM1 PE=1 SV=2 - [YIM1_YEAST]	52.5631	30.68	9	18	24.2759	0.72±0.03	0.00502066
P09201	FBP1	Fructose-1,6-bisphosphatase OS=Saccharomyces cerevisiae (strain ATCC 204508 / S288c) GN=FBP1 PE=1 SV=2 - [F16P_YEAST]	394.657	52.87	19	117	32.2135	0.72±0.03	0.00474176
P53230	TAM41	Phosphatidate cytidylyltransferase, mitochondrial OS=Saccharomyces cerevisiae (strain ATCC 204508 / S288c) GN=TAM41 PE=1 SV=1 - [TAM41_YEAST]	6.90578	11.43	2	2	12.7188	0.71±0.07	0.0194346
Q06137	YLR345W	Putative 6-phosphofructo-2-kinase/fructose-2,6-bisphosphatase YLR345W OS=Saccharomyces cerevisiae (strain ATCC 204508 / S288c) GN=YLR345W PE=1 SV=1 - [YL345_YEAST]	25.9869	17.88	6	8	23.0492	0.71±0.02	0.00216868
Q12292	ATG34	Autophagy-related protein 34 OS=Saccharomyces cerevisiae (strain ATCC 204508 / S288c) GN=ATG34 PE=1 SV=1 - [ATG34_YEAST]	16.7946	16.99	5	5	33.4434	0.71±0.05	0.00928211
P36047	SDS22	Protein phosphatase 1 regulatory subunit SDS22 OS=Saccharomyces cerevisiae (strain ATCC 204508 / S288c) GN=SDS22 PE=1 SV=1 - [SDS22_YEAST]	120.321	43.2	13	36	18.586	0.71±0.02	0.00141355
P33329	PPZ2	Serine/threonine-protein phosphatase PP-Z2 OS=Saccharomyces cerevisiae (strain ATCC 204508 / S288c) GN=PPZ2 PE=1 SV=4 - [PPZ2_YEAST]	18.4602	8.87	2	6	11.057	0.71±0.04	0.00616932
P40547	VID28	Vacuolar import and degradation protein 28 OS=Saccharomyces cerevisiae (strain ATCC 204508 / S288c) GN=VID28 PE=1 SV=1 - [VID28_YEAST]	6.10157	2.61	2	2	23.22	0.71±0.07	0.0178651
P53974	ARK1	Actin-regulating kinase 1 OS=Saccharomyces cerevisiae (strain ATCC 204508 / S288c) GN=ARK1 PE=1 SV=1 - [ARK1_YEAST]	5.80099	4.23	2	2	11.4139	0.71±0.07	0.0213617
P40523	YIL055C	Uncharacterized protein YIL055C OS=Saccharomyces cerevisiae (strain ATCC 204508 / S288c) GN=YIL055C PE=1 SV=1 - [YIF5_YEAST]	37.744	17.07	6	12	18.8166	0.71±0.03	0.00417125
P49723	RNR4	Ribonucleoside-diphosphate reductase small chain 2 OS=Saccharomyces cerevisiae (strain ATCC 204508 / S288c) GN=RNR4 PE=1 SV=1 - [RIR4_YEAST]	348.121	65.51	25	108	28.2929	0.71±0.05	0.00863413
P05745	RPL36A	60S ribosomal protein L36-A OS=Saccharomyces cerevisiae (strain ATCC 204508 / S288c) GN=RPL36A PE=1 SV=3 - [RL36A_YEAST]	134.417	50	2	44	33.8922	0.71±0.05	0.00977349
P47177	YJR149W	Putative nitronate monooxygenase OS=Saccharomyces cerevisiae (strain ATCC 204508 / S288c) GN=YJR149W PE=1 SV=2 - [2NDP_YEAST]	15.0146	16.58	4	4	32.6421	0.71±0.06	0.0158875
P40011	YER010C	4-hydroxy-4-methyl-2-oxoglutarate aldolase OS=Saccharomyces cerevisiae (strain ATCC 204508 / S288c) GN=YER010C PE=1 SV=1 - [RRAAH_YEAST]	22.383	23.08	4	8	25.1664	0.71±0.03	0.00452969
P32793	YSC84	Protein YSC84 OS=Saccharomyces cerevisiae (strain ATCC 204508 / S288c) GN=YSC84 PE=1 SV=2 - [YSC84_YEAST]	42.6393	20.94	5	13	17.5213	0.71±0.02	0.00167561
P52489	PYK2	Pyruvate kinase 2 OS=Saccharomyces cerevisiae (strain ATCC 204508 / S288c) GN=PYK2 PE=1 SV=1 - [KPYK2_YEAST]	166.901	42.29	16	52	23.6057	0.71±0.02	0.00195051
Q12335	PST2	Protoplast secreted protein 2 OS=Saccharomyces cerevisiae (strain ATCC 204508 / S288c) GN=PST2 PE=1 SV=1 - [PST2_YEAST]	247.145	63.64	8	61	24.162	0.71±0.02	0.0018791
P38426	TPS3	Trehalose synthase complex regulatory subunit TPS3 OS=Saccharomyces cerevisiae (strain ATCC 204508 / S288c) GN=TPS3 PE=1 SV=3 - [TPS3_YEAST]	140.297	32.07	26	42	24.0594	0.71±0.02	0.0011375
P27614	CPS1	Carboxypeptidase S OS=Saccharomyces cerevisiae (strain ATCC 204508 / S288c) GN=CPS1 PE=1 SV=2 - [CBPS_YEAST]	142.47	33.33	18	47	33.8941	0.71±0.01	0.000612001
P40492	FYV10	Protein FYV10 OS=Saccharomyces cerevisiae (strain ATCC 204508 / S288c) GN=FYV10 PE=1 SV=1 - [FYV10_YEAST]	13.5876	9.5	3	4	16.3922	0.71±0.07	0.0177345
P39721	AIM2	Protein AIM2 OS=Saccharomyces cerevisiae (strain ATCC 204508 / S288c) GN=AIM2 PE=1 SV=1 - [AIM2_YEAST]	19.2944	27.24	5	6	16.392	0.71±0.08	0.0237502
P00331	ADH2	Alcohol dehydrogenase 2 OS=Saccharomyces cerevisiae (strain ATCC 204508 / S288c) GN=ADH2 PE=1 SV=3 - [ADH2_YEAST]	1457.25	63.79	13	429	29.8255	0.7±0.08	0.0246798
Q12421	ATG31	Autophagy-related protein 31 OS=Saccharomyces cerevisiae (strain ATCC 204508 / S288c) GN=ATG31 PE=1 SV=1 - [ATG31_YEAST]	5.15078	9.18	2	2	38.5491	0.7±0.04	0.00603241
Q8J0M4	YCL012C	UPF0357 protein YCL012C OS=Saccharomyces cerevisiae (strain ATCC 204508 / S288c) GN=YCL012C PE=1 SV=2 - [YCB2_YEAST]	6.39905	20.9	2	2	14.3532	0.7±0.04	0.006446
Q06336	GGA1	ADP-ribosylation factor-binding protein GGA1 OS=Saccharomyces cerevisiae (strain ATCC 204508 / S288c) GN=GGA1 PE=1 SV=1 - [GGA1_YEAST]	91.5904	45.42	18	29	29.7462	0.7±0.02	0.00143417
Q03148	SNZ1	Pyridoxal 5'-phosphate synthase subunit SNZ1 OS=Saccharomyces cerevisiae (strain ATCC 204508 / S288c) GN=SNZ1 PE=1 SV=1 - [SNZ1_YEAST]	59.0172	45.12	10	19	34.2207	0.7±0.06	0.0135834
P38142	YBR241C	Probable metabolite transport protein YBR241C OS=Saccharomyces cerevisiae (strain ATCC 204508 / S288c) GN=YBR241C PE=1 SV=1 - [YB91_YEAST]	13.0983	7.99	3	4	17.5913	0.7±0.03	0.00318652
P40986	CDC1	Cell division control protein 1 OS=Saccharomyces cerevisiae (strain ATCC 204508 / S288c) GN=CDC1 PE=1 SV=2 - [CDC1_YEAST]	19.0971	12.02	5	6	15.2692	0.69±0.02	0.00107088
P32350	KNS1	Dual specificity protein kinase KNS1 OS=Saccharomyces cerevisiae (strain ATCC 204508 / S288c) GN=KNS1 PE=1 SV=2 - [KNS1_YEAST]	12.2209	7.73	4	4	30.2405	0.69±0.06	0.0107074
P48016	ATH1	Vacuolar acid trehalase OS=Saccharomyces cerevisiae (strain ATCC 204508 / S288c) GN=ATH1 PE=1 SV=1 - [ATH1_YEAST]	59.0902	11.07	13	20	27.2039	0.69±0.04	0.00605188
P18963	IRA1	Inhibitory regulator protein IRA1 OS=Saccharomyces cerevisiae (strain ATCC 204508 / S288c) GN=IRA1 PE=1 SV=2 - [IRA1_YEAST]	13.5516	1.55	3	5	17.8767	0.69±0.02	0.00135232
Q04869	YMR315W	Uncharacterized protein YMR315W OS=Saccharomyces cerevisiae (strain ATCC 204508 / S288c) GN=YMR315W PE=1 SV=1 - [YM94_YEAST]	82.9248	39.26	10	22	16.1686	0.69±0.02	0.00163606
P38314	SDS24	Protein SDS24 OS=Saccharomyces cerevisiae (strain ATCC 204508 / S288c) GN=SDS24 PE=1 SV=1 - [SDS24_YEAST]	73.9542	23.72	8	24	29.6363	0.69±0.02	0.00127738
Q12305	RDL1	Thiosulfate sulfurtransferase RDL1, mitochondrial OS=Saccharomyces cerevisiae (strain ATCC 204508 / S288c) GN=RDL1 PE=1 SV=1 - [RDL1_YEAST]	215.666	93.53	11	64	26.4545	0.69±0.05	0.0091126
P37302	APE3	Aminopeptidase Y OS=Saccharomyces cerevisiae (strain ATCC 204508 / S288c) GN=APE3 PE=1 SV=1 - [APE3_YEAST]	290.316	40.97	18	79	25.4569	0.69±0.06	0.0133602
P35719	MRP8	Uncharacterized protein MRP8 OS=Saccharomyces cerevisiae (strain ATCC 204508 / S288c) GN=MRP8 PE=1 SV=1 - [MRP8_YEAST]	211.332	78.08	20	62	23.8665	0.69±0.04	0.00455201
P38235	YBR053C	Uncharacterized protein YBR053C OS=Saccharomyces cerevisiae (strain ATCC 204508 / S288c) GN=YBR053C PE=1 SV=1 - [YBQ3_YEAST]	77.9105	42.18	13	24	23.1075	0.68±0.01	0.000577725
P34227	PRX1	Mitochondrial peroxiredoxin PRX1 OS=Saccharomyces cerevisiae (strain ATCC 204508 / S288c) GN=PRX1 PE=1 SV=1 - [PRX1_YEAST]	168.417	55.56	15	53	25.5124	0.68±0.02	0.00185707
P32831	NGR1	Negative growth regulatory protein NGR1 OS=Saccharomyces cerevisiae (strain ATCC 204508 / S288c) GN=NGR1 PE=1 SV=2 - [NGR1_YEAST]	35.4158	19.49	9	12	15.3914	0.68±0.03	0.00361908
Q12734	CSR2	Transcription factor CSR2 OS=Saccharomyces cerevisiae (strain ATCC 204508 / S288c) GN=CSR2 PE=1 SV=1 - [CSR2_YEAST]	8.98718	5.08	3	3	13.5088	0.68±0.05	0.00814874
P10591	SSA1	Heat shock protein SSA1 OS=Saccharomyces cerevisiae (strain ATCC 204508 / S288c) GN=SSA1 PE=1 SV=4 - [HSP71_YEAST]	2391.04	74.14	18	673	30.9107	0.68±0.01	0.000530216
P39714	BDH1	(R,R)-butanediol dehydrogenase OS=Saccharomyces cerevisiae (strain ATCC 204508 / S288c) GN=BDH1 PE=1 SV=2 - [BDH1_YEAST]	101.834	34.55	11	31	26.7206	0.68±0.01	0.000196818
Q08886	GPB1	Guanine nucleotide-binding protein subunit beta 1 OS=Saccharomyces cerevisiae (strain ATCC 204508 / S288c) GN=GPB1 PE=1 SV=1 - [GPB1_YEAST]	5.47029	3.46	2	2	25.0481	0.67±0.03	0.0034601
P53128	MET13	Methylenetetrahydrofolate reductase 2 OS=Saccharomyces cerevisiae (strain ATCC 204508 / S288c) GN=MET13 PE=1 SV=2 - [MTHR2_YEAST]	19.9992	12	6	7	16.541	0.67±0.02	0.00109495
P40580	IRC24	Benzil reductase ((S)-benzoin forming) IRC24 OS=Saccharomyces cerevisiae (strain ATCC 204508 / S288c) GN=IRC24 PE=1 SV=1 - [BZRD_YEAST]	145.28	65.78	13	41	29.2778	0.67±0.03	0.00364659
P25569	GID7	Glucose-induced degradation protein 7 OS=Saccharomyces cerevisiae (strain ATCC 204508 / S288c) GN=GID7 PE=1 SV=2 - [GID7_YEAST]	11.286	10.34	3	4	17.3664	0.67±0.02	0.00108732
P38130	KTR3	Probable mannosyltransferase KTR3 OS=Saccharomyces cerevisiae (strain ATCC 204508 / S288c) GN=KTR3 PE=1 SV=1 - [KTR3_YEAST]	9.44189	8.17	3	3	7.26913	0.67±0.04	0.00588973
Q05031	DFG5	Mannan endo-1,6-alpha-mannosidase DFG5 OS=Saccharomyces cerevisiae (strain ATCC 204508 / S288c) GN=DFG5 PE=1 SV=1 - [DFG5_YEAST]	6.05593	6.55	2	2	21.3815	0.67±0.05	0.0091578
P38071	ETR1	Enoyl-[acyl-carrier-protein] reductase, mitochondrial OS=Saccharomyces cerevisiae (strain ATCC 204508 / S288c) GN=ETR1 PE=1 SV=3 - [ETR1_YEAST]	169.313	61.32	19	50	26.7097	0.67±0.05	0.00847511
P47142	VPS25	Vacuolar protein-sorting-associated protein 25 OS=Saccharomyces cerevisiae (strain ATCC 204508 / S288c) GN=VPS25 PE=1 SV=1 - [VPS25_YEAST]	5.1488	12.38	2	2	17.1642	0.67±0.02	0.00118599
P32604	FBP26	Fructose-2,6-bisphosphatase OS=Saccharomyces cerevisiae (strain ATCC 204508 / S288c) GN=FBP26 PE=1 SV=2 - [F26_YEAST]	40.7249	25.22	8	12	16.3413	0.67±0.03	0.00204291
P38230	ZTA1	Probable quinone oxidoreductase OS=Saccharomyces cerevisiae (strain ATCC 204508 / S288c) GN=ZTA1 PE=1 SV=1 - [QOR_YEAST]	183.581	67.07	25	57	26.3937	0.67±0.07	0.0130152
Q04212	ARA2	D-arabinose 1-dehydrogenase OS=Saccharomyces cerevisiae (strain ATCC 204508 / S288c) GN=ARA2 PE=1 SV=1 - [ARA2_YEAST]	29.6316	24.48	6	9	42.4947	0.66±0.04	0.00500177
P43590	YFR006W	Uncharacterized peptidase YFR006W OS=Saccharomyces cerevisiae (strain ATCC 204508 / S288c) GN=YFR006W PE=1 SV=1 - [YFH6_YEAST]	88.5288	36.45	17	28	27.7462	0.66±0.04	0.0040634
P41816	OYE3	NADPH dehydrogenase 3 OS=Saccharomyces cerevisiae (strain ATCC 204508 / S288c) GN=OYE3 PE=1 SV=2 - [OYE3_YEAST]	55.0198	32.75	10	18	25.6574	0.66±0.03	0.00245409
P53839	GOR1	Glyoxylate reductase 1 OS=Saccharomyces cerevisiae (strain ATCC 204508 / S288c) GN=GOR1 PE=1 SV=1 - [GOR1_YEAST]	101.462	43.43	15	35	23.1936	0.66±0.04	0.00506657
P39956	RPH1	DNA damage-responsive transcriptional repressor RPH1 OS=Saccharomyces cerevisiae (strain ATCC 204508 / S288c) GN=RPH1 PE=1 SV=1 - [RPH1_YEAST]	11.408	5.65	3	4	10.584	0.66±0.06	0.00904474
P47011	GLG2	Glycogenin-2 OS=Saccharomyces cerevisiae (strain ATCC 204508 / S288c) GN=GLG2 PE=1 SV=1 - [GLG2_YEAST]	17.2118	17.11	5	5	45.1837	0.65±0.02	0.00161411
Q06089	YPR098C	Uncharacterized mitochondrial outer membrane protein YPR098C OS=Saccharomyces cerevisiae (strain ATCC 204508 / S288c) GN=YPR098C PE=1 SV=2 - [YP098_YEAST]	10.6515	6.21	2	3	35.82	0.65±0.08	0.0163769
P00175	CYB2	Cytochrome b2, mitochondrial OS=Saccharomyces cerevisiae (strain ATCC 204508 / S288c) GN=CYB2 PE=1 SV=1 - [CYB2_YEAST]	140.249	35.03	17	41	38.1016	0.65±0.02	0.00159892
P07267	PEP4	Saccharopepsin OS=Saccharomyces cerevisiae (strain ATCC 204508 / S288c) GN=PEP4 PE=1 SV=1 - [CARP_YEAST]	326.372	39.01	18	87	22.9898	0.65±0.04	0.00435315
P09232	PRB1	Cerevisin OS=Saccharomyces cerevisiae (strain ATCC 204508 / S288c) GN=PRB1 PE=1 SV=1 - [PRTB_YEAST]	136.685	23.78	15	41	30.3141	0.64±0.04	0.00462685
Q07651	FMP45	SUR7 family protein FMP45 OS=Saccharomyces cerevisiae (strain ATCC 204508 / S288c) GN=FMP45 PE=1 SV=1 - [FMP45_YEAST]	9.09391	19.42	2	3	20.1423	0.64±0.03	0.00314132
P47085	YJR008W	MEMO1 family protein YJR008W OS=Saccharomyces cerevisiae (strain ATCC 204508 / S288c) GN=YJR008W PE=1 SV=1 - [YJX8_YEAST]	58.74	30.47	9	18	42.5565	0.64±0.02	0.00116051
Q12012	YOR289W	Uncharacterized protein YOR289W OS=Saccharomyces cerevisiae (strain ATCC 204508 / S288c) GN=YOR289W PE=1 SV=1 - [YO289_YEAST]	49.929	28.69	9	16	18.0212	0.64±0.02	0.000896588
Q05584	GLO2	Hydroxyacylglutathione hydrolase, cytoplasmic isozyme OS=Saccharomyces cerevisiae (strain ATCC 204508 / S288c) GN=GLO2 PE=1 SV=1 - [GLO2_YEAST]	84.3302	53.28	13	27	22.9258	0.64±0.02	0.00138997
Q02933	RNY1	Ribonuclease T2-like OS=Saccharomyces cerevisiae (strain ATCC 204508 / S288c) GN=RNY1 PE=1 SV=1 - [RNY1_YEAST]	19.8874	10.14	4	6	15.1684	0.64±0.03	0.00296642
P43598	IGD1	Inhibitor of glycogen debranching 1 OS=Saccharomyces cerevisiae (strain ATCC 204508 / S288c) GN=IGD1 PE=1 SV=1 - [IGD1_YEAST]	19.0769	33.85	3	6	34.9941	0.64±0.04	0.00391241
P07278	BCY1	cAMP-dependent protein kinase regulatory subunit OS=Saccharomyces cerevisiae (strain ATCC 204508 / S288c) GN=BCY1 PE=1 SV=4 - [KAPR_YEAST]	168.799	60.34	22	49	29.3176	0.63±0	4.86508e-05
P53912	YNL134C	Uncharacterized protein YNL134C OS=Saccharomyces cerevisiae (strain ATCC 204508 / S288c) GN=YNL134C PE=1 SV=1 - [YNN4_YEAST]	350.231	54.52	19	99	26.0593	0.63±0.02	0.000671783
P36141	FMP46	Putative redox protein FMP46, mitochondrial OS=Saccharomyces cerevisiae (strain ATCC 204508 / S288c) GN=FMP46 PE=1 SV=1 - [FMP46_YEAST]	38.8227	40.6	4	11	17.5191	0.63±0.06	0.00807371
P33324	YKL091C	CRAL-TRIO domain-containing protein YKL091C OS=Saccharomyces cerevisiae (strain ATCC 204508 / S288c) GN=YKL091C PE=1 SV=2 - [YKJ1_YEAST]	11.8574	12.58	3	4	19.6381	0.63±0.03	0.00209536
Q04471	YMR114C	Putative peptidase YMR114C OS=Saccharomyces cerevisiae (strain ATCC 204508 / S288c) GN=YMR114C PE=1 SV=1 - [YM04_YEAST]	50.5457	29.62	8	15	30.2782	0.62±0	5.69266e-05
P25659	FUB1	Silencing boundary-establishment protein FUB1 OS=Saccharomyces cerevisiae (strain ATCC 204508 / S288c) GN=FUB1 PE=1 SV=1 - [FUB1_YEAST]	13.5281	18	4	4	22.7186	0.62±0.02	0.0012316
P27466	CMK1	Calcium/calmodulin-dependent protein kinase I OS=Saccharomyces cerevisiae (strain ATCC 204508 / S288c) GN=CMK1 PE=1 SV=2 - [KCC1_YEAST]	67.3246	34.98	14	21	21.4064	0.62±0.03	0.0019572
P36143	GLG1	Glycogenin-1 OS=Saccharomyces cerevisiae (strain ATCC 204508 / S288c) GN=GLG1 PE=1 SV=4 - [GLG1_YEAST]	21.4387	9.58	5	6	10.2084	0.62±0.05	0.00455105
P40036	GIP2	GLC7-interacting protein 2 OS=Saccharomyces cerevisiae (strain ATCC 204508 / S288c) GN=GIP2 PE=1 SV=1 - [GIP2_YEAST]	12.0959	9.31	4	4	17.9367	0.61±0.03	0.00171696
Q07500	NDE2	External NADH-ubiquinone oxidoreductase 2, mitochondrial OS=Saccharomyces cerevisiae (strain ATCC 204508 / S288c) GN=NDE2 PE=1 SV=1 - [NDH2_YEAST]	66.6376	27.89	8	20	26.6906	0.61±0.06	0.00734304
P14680	YAK1	Dual specificity protein kinase YAK1 OS=Saccharomyces cerevisiae (strain ATCC 204508 / S288c) GN=YAK1 PE=1 SV=1 - [YAK1_YEAST]	59.2868	20.57	13	19	23.6956	0.61±0.02	0.000580675
P38067	UGA2	Succinate-semialdehyde dehydrogenase [NADP(+)] OS=Saccharomyces cerevisiae (strain ATCC 204508 / S288c) GN=UGA2 PE=1 SV=2 - [UGA2_YEAST]	112.897	42.25	15	36	43.2011	0.61±0.03	0.00210273
P06245	TPK2	cAMP-dependent protein kinase type 2 OS=Saccharomyces cerevisiae (strain ATCC 204508 / S288c) GN=TPK2 PE=1 SV=2 - [KAPB_YEAST]	24.8073	21.05	5	7	17.3304	0.61±0.01	0.000292905
Q02961	YPL113C	Putative 2-hydroxyacid dehydrogenase YPL113C OS=Saccharomyces cerevisiae (strain ATCC 204508 / S288c) GN=YPL113C PE=2 SV=1 - [YP113_YEAST]	7.9202	11.11	3	3	41.0592	0.61±0.02	0.000843857
P09938	RNR2	Ribonucleoside-diphosphate reductase small chain 1 OS=Saccharomyces cerevisiae (strain ATCC 204508 / S288c) GN=RNR2 PE=1 SV=2 - [RIR2_YEAST]	363.781	55.89	26	115	36.5845	0.61±0.02	0.00129979
P17649	UGA1	4-aminobutyrate aminotransferase OS=Saccharomyces cerevisiae (strain ATCC 204508 / S288c) GN=UGA1 PE=1 SV=2 - [GABAT_YEAST]	242.823	56.26	26	70	30.3169	0.6±0.02	0.00120291
Q12177	YLL056C	Uncharacterized protein YLL056C OS=Saccharomyces cerevisiae (strain ATCC 204508 / S288c) GN=YLL056C PE=2 SV=1 - [YL056_YEAST]	14.3773	19.8	4	5	34.2035	0.6±0.08	0.0129967
P17709	GLK1	Glucokinase-1 OS=Saccharomyces cerevisiae (strain ATCC 204508 / S288c) GN=GLK1 PE=1 SV=1 - [HXKG_YEAST]	612.209	64	28	193	37.3637	0.59±0.02	0.00109033
P38690	YHR033W	Uncharacterized protein YHR033W OS=Saccharomyces cerevisiae (strain ATCC 204508 / S288c) GN=YHR033W PE=3 SV=1 - [YHJ3_YEAST]	12.2908	7.33	2	4	15.133	0.59±0.03	0.00203776
Q08968	FMP40	UPF0061 protein FMP40 OS=Saccharomyces cerevisiae (strain ATCC 204508 / S288c) GN=FMP40 PE=1 SV=1 - [FMP40_YEAST]	55.977	25.44	15	19	26.1205	0.59±0.01	0.000305879
Q12396	EMP46	Protein EMP46 OS=Saccharomyces cerevisiae (strain ATCC 204508 / S288c) GN=EMP46 PE=1 SV=1 - [EMP46_YEAST]	35.4181	25.68	8	11	23.9215	0.59±0.04	0.00334688
P27472	GSY2	Glycogen [starch] synthase isoform 2 OS=Saccharomyces cerevisiae (strain ATCC 204508 / S288c) GN=GSY2 PE=1 SV=3 - [GYS2_YEAST]	209.846	39.57	18	56	32.3546	0.59±0.05	0.00535409
P28003	FUN19	SWIRM domain-containing protein FUN19 OS=Saccharomyces cerevisiae (strain ATCC 204508 / S288c) GN=FUN19 PE=1 SV=3 - [FUN19_YEAST]	18.0532	11.14	4	6	16.1507	0.59±0.02	0.000545895
P27796	POT1	3-ketoacyl-CoA thiolase, peroxisomal OS=Saccharomyces cerevisiae (strain ATCC 204508 / S288c) GN=POT1 PE=1 SV=1 - [THIK_YEAST]	187.303	47	16	53	33.9144	0.59±0.06	0.00693692
Q05812	MSC3	Meiotic sister-chromatid recombination protein 3 OS=Saccharomyces cerevisiae (strain ATCC 204508 / S288c) GN=MSC3 PE=1 SV=1 - [MSC3_YEAST]	79.2404	26.79	14	23	33.0067	0.58±0.05	0.00397754
P40043	RGI1	Respiratory growth induced protein 1 OS=Saccharomyces cerevisiae (strain ATCC 204508 / S288c) GN=RGI1 PE=1 SV=1 - [RGI1_YEAST]	12.1399	18.63	2	3	6.7039	0.58±0.01	0.000202198
P38115	ARA1	D-arabinose dehydrogenase [NAD(P)+] heavy chain OS=Saccharomyces cerevisiae (strain ATCC 204508 / S288c) GN=ARA1 PE=1 SV=1 - [ARA1_YEAST]	260.802	65.99	23	77	32.479	0.58±0.04	0.00233628
P24784	DBP1	ATP-dependent RNA helicase DBP1 OS=Saccharomyces cerevisiae (strain ATCC 204508 / S288c) GN=DBP1 PE=1 SV=2 - [DBP1_YEAST]	142.478	30.63	14	44	32.3402	0.57±0.03	0.00130603
Q3E7A9	CMC4	Cx9C motif-containing protein 4, mitochondrial OS=Saccharomyces cerevisiae (strain ATCC 204508 / S288c) GN=CMC4 PE=3 SV=1 - [CMC4_YEAST]	21.4927	57.53	3	6	14.2311	0.57±0.04	0.00336719
P00447	SOD2	Superoxide dismutase [Mn], mitochondrial OS=Saccharomyces cerevisiae (strain ATCC 204508 / S288c) GN=SOD2 PE=1 SV=1 - [SODM_YEAST]	141.735	49.36	10	41	37.4406	0.57±0.01	0.000183208
P40471	AYR1	NADPH-dependent 1-acyldihydroxyacetone phosphate reductase OS=Saccharomyces cerevisiae (strain ATCC 204508 / S288c) GN=AYR1 PE=1 SV=1 - [AYR1_YEAST]	97.6909	36.7	8	26	25.4676	0.57±0.05	0.00404549
Q12513	TMA17	Translation machinery-associated protein 17 OS=Saccharomyces cerevisiae (strain ATCC 204508 / S288c) GN=TMA17 PE=1 SV=1 - [TMA17_YEAST]	178.715	78.67	14	52	46.019	0.57±0.02	0.000800304
Q04170	YDR391C	Uncharacterized protein YDR391C OS=Saccharomyces cerevisiae (strain ATCC 204508 / S288c) GN=YDR391C PE=1 SV=1 - [YD391_YEAST]	14.2775	22.84	5	5	28.7629	0.57±0.08	0.0105003
O43137	YBR085C-A	Uncharacterized protein YBR085C-A OS=Saccharomyces cerevisiae (strain ATCC 204508 / S288c) GN=YBR085C-A PE=1 SV=1 - [YB085_YEAST]	55.178	50.59	5	15	14.299	0.57±0.07	0.00857504
Q06152	YLR271W	Uncharacterized protein YLR271W OS=Saccharomyces cerevisiae (strain ATCC 204508 / S288c) GN=YLR271W PE=1 SV=1 - [YL271_YEAST]	6.91133	6.57	2	2	20.3778	0.57±0.02	0.000631941
Q06608	YPR172W	Pyridoxamine 5'-phosphate oxidase homolog OS=Saccharomyces cerevisiae (strain ATCC 204508 / S288c) GN=YPR172W PE=1 SV=1 - [PDXH_YEAST]	51.7119	36.5	5	15	43.3828	0.57±0.03	0.0013266
Q05050	EIS1	Eisosome protein 1 OS=Saccharomyces cerevisiae (strain ATCC 204508 / S288c) GN=EIS1 PE=1 SV=1 - [EIS1_YEAST]	326.236	53.14	45	102	31.6161	0.57±0.03	0.00138334
P38109	YBR139W	Putative serine carboxypeptidase YBR139W OS=Saccharomyces cerevisiae (strain ATCC 204508 / S288c) GN=YBR139W PE=1 SV=1 - [YBY9_YEAST]	34.838	9.06	5	11	20.2913	0.57±0.02	0.00104179
P00045	CYC7	Cytochrome c iso-2 OS=Saccharomyces cerevisiae (strain ATCC 204508 / S288c) GN=CYC7 PE=1 SV=1 - [CYC7_YEAST]	43.2843	37.17	2	13	45.2922	0.57±0.01	0.000105488
P40364	MPM1	Mitochondrial peculiar membrane protein 1 OS=Saccharomyces cerevisiae (strain ATCC 204508 / S288c) GN=MPM1 PE=1 SV=1 - [MPM1_YEAST]	91.6909	56.35	11	30	27.7586	0.56±0.01	0.000346975
Q12363	WTM1	Transcriptional modulator WTM1 OS=Saccharomyces cerevisiae (strain ATCC 204508 / S288c) GN=WTM1 PE=1 SV=1 - [WTM1_YEAST]	413.214	43.71	15	117	32.6497	0.56±0.03	0.00166761
P38809	YHR097C	Uncharacterized protein YHR097C OS=Saccharomyces cerevisiae (strain ATCC 204508 / S288c) GN=YHR097C PE=1 SV=1 - [YHP7_YEAST]	41.678	33.06	9	14	30.3917	0.56±0.03	0.00208227
Q04458	HFD1	Fatty aldehyde dehydrogenase HFD1 OS=Saccharomyces cerevisiae (strain ATCC 204508 / S288c) GN=HFD1 PE=1 SV=1 - [HFD1_YEAST]	103.091	28.01	15	33	22.5062	0.55±0.01	0.000309178
Q12032	AIM41	Altered inheritance of mitochondria protein 41, mitochondrial OS=Saccharomyces cerevisiae (strain ATCC 204508 / S288c) GN=AIM41 PE=1 SV=1 - [AIM41_YEAST]	126.776	48.11	16	39	25.1536	0.55±0.05	0.00459619
P38816	TRR2	Thioredoxin reductase 2, mitochondrial OS=Saccharomyces cerevisiae (strain ATCC 204508 / S288c) GN=TRR2 PE=1 SV=1 - [TRXB2_YEAST]	84.5746	41.23	6	23	33.978	0.55±0.03	0.0015848
P39708	GDH3	NADP-specific glutamate dehydrogenase 2 OS=Saccharomyces cerevisiae (strain ATCC 204508 / S288c) GN=GDH3 PE=3 SV=1 - [DHE5_YEAST]	413.29	75.93	19	120	49.0889	0.55±0.03	0.00105512
Q06151	DCS1	m7GpppX diphosphatase OS=Saccharomyces cerevisiae (strain ATCC 204508 / S288c) GN=DCS1 PE=1 SV=1 - [DCPS_YEAST]	254.46	66.29	20	74	39.6048	0.55±0.01	0.000187913
P53252	PIL1	Sphingolipid long chain base-responsive protein PIL1 OS=Saccharomyces cerevisiae (strain ATCC 204508 / S288c) GN=PIL1 PE=1 SV=1 - [PIL1_YEAST]	331.694	54.87	17	91	44.2468	0.55±0.02	0.000576147
P36139	PET10	Protein PET10 OS=Saccharomyces cerevisiae (strain ATCC 204508 / S288c) GN=PET10 PE=1 SV=3 - [PET10_YEAST]	108.939	50.53	13	30	29.5658	0.54±0.01	6.61636e-05
P23776	EXG1	Glucan 1,3-beta-glucosidase I/II OS=Saccharomyces cerevisiae (strain ATCC 204508 / S288c) GN=EXG1 PE=1 SV=1 - [EXG1_YEAST]	34.8633	17.19	6	10	44.9845	0.54±0.03	0.00154759
P35736	YKL050C	Uncharacterized protein YKL050C OS=Saccharomyces cerevisiae (strain ATCC 204508 / S288c) GN=YKL050C PE=2 SV=1 - [YKF0_YEAST]	15.9642	5.75	4	5	26.1517	0.54±0.02	0.000509162
Q04336	YMR196W	Uncharacterized protein YMR196W OS=Saccharomyces cerevisiae (strain ATCC 204508 / S288c) GN=YMR196W PE=1 SV=1 - [YM54_YEAST]	201.85	34.47	29	60	43.0888	0.54±0.03	0.000977755
P28006	GAC1	Serine/threonine-protein phosphatase 1 regulatory subunit GAC1 OS=Saccharomyces cerevisiae (strain ATCC 204508 / S288c) GN=GAC1 PE=1 SV=2 - [GAC1_YEAST]	8.52529	3.53	2	3	22.3538	0.54±0.04	0.00238982
P50107	GLO1	Lactoylglutathione lyase OS=Saccharomyces cerevisiae (strain ATCC 204508 / S288c) GN=GLO1 PE=1 SV=1 - [LGUL_YEAST]	73.9291	29.45	9	22	30.7998	0.54±0.06	0.0057906
P38715	GRE3	NADPH-dependent aldose reductase GRE3 OS=Saccharomyces cerevisiae (strain ATCC 204508 / S288c) GN=GRE3 PE=1 SV=1 - [GRE3_YEAST]	163.258	50.46	20	50	30.8005	0.53±0.02	0.000694222
Q07993	XYL2	D-xylulose reductase OS=Saccharomyces cerevisiae (strain ATCC 204508 / S288c) GN=XYL2 PE=1 SV=1 - [XYL2_YEAST]	17.6916	13.76	5	6	23.4823	0.53±0.03	0.00174026
P32356	NTH1	Neutral trehalase OS=Saccharomyces cerevisiae (strain ATCC 204508 / S288c) GN=NTH1 PE=1 SV=3 - [TREA_YEAST]	177.656	33.69	24	55	34.4539	0.53±0.01	0.000149252
P0CT04	PBI2	Protease B inhibitor 2 OS=Saccharomyces cerevisiae (strain ATCC 204508 / S288c) GN=PBI2 PE=1 SV=1 - [IPB2_YEAST]	166.743	66.67	11	53	39.0999	0.53±0.06	0.00613745
P38081	YBR056W	Uncharacterized glycosyl hydrolase YBR056W OS=Saccharomyces cerevisiae (strain ATCC 204508 / S288c) GN=YBR056W PE=1 SV=1 - [YBQ6_YEAST]	103.84	33.93	18	31	28.2509	0.53±0.02	0.000896665
P23337	GSY1	Glycogen [starch] synthase isoform 1 OS=Saccharomyces cerevisiae (strain ATCC 204508 / S288c) GN=GSY1 PE=1 SV=3 - [GYS1_YEAST]	46.691	16.24	6	13	24.1778	0.52±0.04	0.00182932
Q12068	GRE2	NADPH-dependent methylglyoxal reductase GRE2 OS=Saccharomyces cerevisiae (strain ATCC 204508 / S288c) GN=GRE2 PE=1 SV=1 - [GRE2_YEAST]	86.7066	27.49	11	28	38.3881	0.51±0.02	0.00048724
P36014	GPX1	Glutathione peroxidase 1 OS=Saccharomyces cerevisiae (strain ATCC 204508 / S288c) GN=GPX1 PE=3 SV=1 - [GPX1_YEAST]	24.7441	24.55	3	8	36.9631	0.51±0.04	0.00178279
Q00764	TPS1	Alpha,alpha-trehalose-phosphate synthase [UDP-forming] 56 kDa subunit OS=Saccharomyces cerevisiae (strain ATCC 204508 / S288c) GN=TPS1 PE=1 SV=2 - [TPS1_YEAST]	288.413	49.29	22	80	48.8172	0.51±0.01	8.88431e-05
P40165	YNL200C	NAD(P)H-hydrate epimerase OS=Saccharomyces cerevisiae (strain ATCC 204508 / S288c) GN=YNL200C PE=1 SV=1 - [NNRE_YEAST]	46.1269	34.96	7	14	26.5731	0.51±0.01	0.000199715
P31539	HSP104	Heat shock protein 104 OS=Saccharomyces cerevisiae (strain ATCC 204508 / S288c) GN=HSP104 PE=1 SV=2 - [HS104_YEAST]	1060.04	65.42	73	326	38.9568	0.5±0.01	3.45013e-05
P53278	YGR130C	Uncharacterized protein YGR130C OS=Saccharomyces cerevisiae (strain ATCC 204508 / S288c) GN=YGR130C PE=1 SV=1 - [YG3A_YEAST]	195.066	40.69	35	63	29.6001	0.5±0.03	0.001188
P47137	YJR096W	Uncharacterized oxidoreductase YJR096W OS=Saccharomyces cerevisiae (strain ATCC 204508 / S288c) GN=YJR096W PE=1 SV=1 - [YJ66_YEAST]	91.3321	70.92	15	29	39.774	0.5±0.02	0.000338814
Q12523	YPL247C	WD repeat-containing protein YPL247C OS=Saccharomyces cerevisiae (strain ATCC 204508 / S288c) GN=YPL247C PE=1 SV=1 - [YP247_YEAST]	20.1765	11.66	4	6	36.8895	0.49±0.04	0.00253504
Q06625	GDB1	Glycogen debranching enzyme OS=Saccharomyces cerevisiae (strain ATCC 204508 / S288c) GN=GDB1 PE=1 SV=1 - [GDE_YEAST]	167.553	25.07	32	52	30.5383	0.49±0.02	0.000558317
P32861	UGP1	UTP--glucose-1-phosphate uridylyltransferase OS=Saccharomyces cerevisiae (strain ATCC 204508 / S288c) GN=UGP1 PE=1 SV=1 - [UGPA1_YEAST]	417.061	52.3	27	124	41.5377	0.48±0.02	0.000466062
P22855	AMS1	Alpha-mannosidase OS=Saccharomyces cerevisiae (strain ATCC 204508 / S288c) GN=AMS1 PE=1 SV=2 - [MAN1_YEAST]	292.416	47.09	42	94	39.88	0.48±0.02	0.000461443
P50088	SPG1	Stationary phase gene 1 protein OS=Saccharomyces cerevisiae (strain ATCC 204508 / S288c) GN=SPG1 PE=1 SV=2 - [SPG1_YEAST]	36.0464	53.68	5	9	38.9828	0.48±0.05	0.00325137
P18899	DDR48	Stress protein DDR48 OS=Saccharomyces cerevisiae (strain ATCC 204508 / S288c) GN=DDR48 PE=1 SV=4 - [DDR48_YEAST]	210.672	63.72	22	62	30.2056	0.48±0.07	0.00518654
Q08926	UIP4	ULP1-interacting protein 4 OS=Saccharomyces cerevisiae (strain ATCC 204508 / S288c) GN=UIP4 PE=1 SV=1 - [UIP4_YEAST]	13.6579	13.49	3	4	12.1629	0.47±0.04	0.00183902
Q04438	SPG4	Stationary phase protein 4 OS=Saccharomyces cerevisiae (strain ATCC 204508 / S288c) GN=SPG4 PE=1 SV=1 - [SPG4_YEAST]	71.7475	42.61	8	21	39.5152	0.47±0.06	0.0042031
P36059	YKL151C	ATP-dependent (S)-NAD(P)H-hydrate dehydratase OS=Saccharomyces cerevisiae (strain ATCC 204508 / S288c) GN=YKL151C PE=1 SV=1 - [NNRD_YEAST]	63.9613	41.84	14	20	27.6789	0.47±0.02	0.000418661
P17695	GRX2	Glutaredoxin-2, mitochondrial OS=Saccharomyces cerevisiae (strain ATCC 204508 / S288c) GN=GRX2 PE=1 SV=3 - [GLRX2_YEAST]	127.694	54.55	9	41	33.2131	0.46±0.02	0.000626931
Q12276	HER1	HMG2-induced ER-remodeling protein 1 OS=Saccharomyces cerevisiae (strain ATCC 204508 / S288c) GN=HER1 PE=1 SV=1 - [HER1_YEAST]	13.9046	5.46	3	4	23.8238	0.46±0.05	0.0026223
P06244	TPK1	cAMP-dependent protein kinase type 1 OS=Saccharomyces cerevisiae (strain ATCC 204508 / S288c) GN=TPK1 PE=1 SV=3 - [KAPA_YEAST]	33.4978	12.85	5	10	35.5804	0.46±0	1.73476e-05
Q12329	HSP42	Heat shock protein 42 OS=Saccharomyces cerevisiae (strain ATCC 204508 / S288c) GN=HSP42 PE=1 SV=1 - [HSP42_YEAST]	56.4217	29.07	8	18	41.0036	0.46±0.01	5.69832e-05
P16547	OM45	Mitochondrial outer membrane protein OM45 OS=Saccharomyces cerevisiae (strain ATCC 204508 / S288c) GN=OM45 PE=1 SV=2 - [OM45_YEAST]	484.159	68.7	43	138	28.8315	0.45±0.04	0.00199191
P31688	TPS2	Trehalose-phosphatase OS=Saccharomyces cerevisiae (strain ATCC 204508 / S288c) GN=TPS2 PE=1 SV=3 - [TPS2_YEAST]	184.381	32.48	26	57	45.3539	0.45±0.02	0.000496236
P40187	PIG2	GSY2-interacting protein PIG2 OS=Saccharomyces cerevisiae (strain ATCC 204508 / S288c) GN=PIG2 PE=1 SV=1 - [PIG2_YEAST]	8.59909	11.34	3	3	10.6292	0.45±0.02	0.000578058
P19158	IRA2	Inhibitory regulator protein IRA2 OS=Saccharomyces cerevisiae (strain ATCC 204508 / S288c) GN=IRA2 PE=1 SV=2 - [IRA2_YEAST]	5.03148	0.84	2	2	14.691	0.45±0.02	0.000667322
P40188	RGI2	Respiratory growth induced protein 2 OS=Saccharomyces cerevisiae (strain ATCC 204508 / S288c) GN=RGI2 PE=1 SV=1 - [RGI2_YEAST]	126.024	63.41	11	40	40.222	0.45±0.07	0.00571354
Q04432	HSP31	Glutathione-independent glyoxalase HSP31 OS=Saccharomyces cerevisiae (strain ATCC 204508 / S288c) GN=HSP31 PE=1 SV=1 - [HSP31_YEAST]	176.336	68.35	16	50	44.3391	0.45±0.03	0.000839463
P39987	ECM10	Heat shock protein SSC3, mitochondrial OS=Saccharomyces cerevisiae (strain ATCC 204508 / S288c) GN=ECM10 PE=3 SV=1 - [HSP7E_YEAST]	203.853	26.71	7	61	40.4708	0.44±0.02	0.000246703
P32775	GLC3	1,4-alpha-glucan-branching enzyme OS=Saccharomyces cerevisiae (strain ATCC 204508 / S288c) GN=GLC3 PE=1 SV=2 - [GLGB_YEAST]	141.86	33.95	22	43	49.3222	0.44±0.03	0.000794321
P36060	MCR1	NADH-cytochrome b5 reductase 2 OS=Saccharomyces cerevisiae (strain ATCC 204508 / S288c) GN=MCR1 PE=1 SV=1 - [MCR1_YEAST]	266.895	71.85	22	75	40.3074	0.43±0.01	8.11835e-05
P30402	URA10	Orotate phosphoribosyltransferase 2 OS=Saccharomyces cerevisiae (strain ATCC 204508 / S288c) GN=URA10 PE=1 SV=3 - [PYRX_YEAST]	33.8784	25.99	4	12	19.3365	0.42±0.04	0.00151567
P34251	YKL107W	Uncharacterized oxidoreductase YKL107W OS=Saccharomyces cerevisiae (strain ATCC 204508 / S288c) GN=YKL107W PE=3 SV=1 - [YKK7_YEAST]	47.4934	49.51	11	16	34.3823	0.42±0.01	5.77862e-05
P32590	SSE2	Heat shock protein homolog SSE2 OS=Saccharomyces cerevisiae (strain ATCC 204508 / S288c) GN=SSE2 PE=1 SV=3 - [HSP79_YEAST]	406.378	60.61	39	121	43.1174	0.41±0.01	4.84548e-05
P53184	PNC1	Nicotinamidase OS=Saccharomyces cerevisiae (strain ATCC 204508 / S288c) GN=PNC1 PE=1 SV=1 - [PNC1_YEAST]	206.993	54.63	12	61	49.8896	0.41±0.01	4.68115e-05
P38427	TSL1	Trehalose synthase complex regulatory subunit TSL1 OS=Saccharomyces cerevisiae (strain ATCC 204508 / S288c) GN=TSL1 PE=1 SV=1 - [TSL1_YEAST]	322.114	38.62	34	94	49.6268	0.41±0.01	0.000136597
P38841	YHR138C	Uncharacterized protein YHR138C OS=Saccharomyces cerevisiae (strain ATCC 204508 / S288c) GN=YHR138C PE=1 SV=1 - [YHT8_YEAST]	111.224	68.42	8	33	46.6539	0.4±0.01	6.12051e-05
Q07551	YDL124W	NADPH-dependent alpha-keto amide reductase OS=Saccharomyces cerevisiae (strain ATCC 204508 / S288c) GN=YDL124W PE=1 SV=1 - [KAR_YEAST]	286.325	75.32	23	82	40.7644	0.39±0.02	0.000478335
P14065	GCY1	Glycerol 2-dehydrogenase (NADP(+)) OS=Saccharomyces cerevisiae (strain ATCC 204508 / S288c) GN=GCY1 PE=1 SV=1 - [GCY1_YEAST]	185.566	63.46	21	56	44.0735	0.38±0.02	0.00042512
Q12355	PST1	Cell wall mannoprotein PST1 OS=Saccharomyces cerevisiae (strain ATCC 204508 / S288c) GN=PST1 PE=1 SV=1 - [PST1_YEAST]	58.1075	18.92	7	16	26.4755	0.37±0.05	0.00210988
P38616	YGP1	Protein YGP1 OS=Saccharomyces cerevisiae (strain ATCC 204508 / S288c) GN=YGP1 PE=1 SV=2 - [YGP1_YEAST]	120.778	27.97	7	35	46.7076	0.36±0.03	0.000608887
P53978	HEF3	Elongation factor 3B OS=Saccharomyces cerevisiae (strain ATCC 204508 / S288c) GN=HEF3 PE=1 SV=2 - [EF3B_YEAST]	366.551	44.64	27	115	44.7972	0.36±0.02	0.000336017
P22202	SSA4	Heat shock protein SSA4 OS=Saccharomyces cerevisiae (strain ATCC 204508 / S288c) GN=SSA4 PE=1 SV=3 - [HSP74_YEAST]	1256.43	66.51	22	345	48.7333	0.35±0.01	3.67947e-05
P38284	ICS2	Increased copper sensitivity protein 2 OS=Saccharomyces cerevisiae (strain ATCC 204508 / S288c) GN=ICS2 PE=1 SV=2 - [ICS2_YEAST]	5.6899	9.41	2	2	27.4683	0.35±0.04	0.000988065
P37012	PGM2	Phosphoglucomutase 2 OS=Saccharomyces cerevisiae (strain ATCC 204508 / S288c) GN=PGM2 PE=1 SV=1 - [PGM2_YEAST]	329.77	59.23	26	101	48.0444	0.34±0.02	0.000218935
P40582	GTT1	Glutathione S-transferase 1 OS=Saccharomyces cerevisiae (strain ATCC 204508 / S288c) GN=GTT1 PE=1 SV=1 - [GST1_YEAST]	91.16	42.31	11	28	47.8444	0.3±0.02	0.000374956
Q04120	TSA2	Peroxiredoxin TSA2 OS=Saccharomyces cerevisiae (strain ATCC 204508 / S288c) GN=TSA2 PE=1 SV=3 - [TSA2_YEAST]	19.27	22.45	3	6	33.9222	0.3±0.02	0.000305822
Score stands for the protein score which is the sum of the scores of the individual peptides generated by PD 1.4.
PSMs stands for total number of spectra used for identification.
Unique Peptides stands for the number of unique peptides used for identification of an specific protein.
Variability [%] stands for variability of reporter ion ratios of unique peptides assigned to each protein.
Mean Ratio ± SD stands for the mean of protein ratios taken from three biological replicates.
p-value stands for the measure of significance.

## Sheet: Table S3
Table S3. The list of upregulated proteins in grx2△.
Accession	Gene Name	Description	Score	Coverage	Unique Peptides	PSMs	Variability	Mean Ratio ± SD	p-value
P38331	YBR242W	HD domain-containing protein YBR242W OS=Saccharomyces cerevisiae (strain ATCC 204508 / S288c) GN=YBR242W PE=1 SV=1 - [YB92_YEAST]	8.29956	10.92	2	2	25.1308	2.03±0.22	0.0152701
P32451	BIO2	Biotin synthase, mitochondrial OS=Saccharomyces cerevisiae (strain ATCC 204508 / S288c) GN=BIO2 PE=1 SV=2 - [BIOB_YEAST]	8.57317	9.87	3	3	13.4093	2.02±0.12	0.00429664
P37303	GLY1	Low specificity L-threonine aldolase OS=Saccharomyces cerevisiae (strain ATCC 204508 / S288c) GN=GLY1 PE=1 SV=2 - [GLY1_YEAST]	95.1552	39.53	11	25	46.2434	1.99±0.15	0.00738842
P40347	LTP1	Low molecular weight phosphotyrosine protein phosphatase OS=Saccharomyces cerevisiae (strain ATCC 204508 / S288c) GN=LTP1 PE=1 SV=1 - [PPAL_YEAST]	35.5189	33.54	5	9	15.844	1.88±0.23	0.0209302
P32466	HXT3	Low-affinity glucose transporter HXT3 OS=Saccharomyces cerevisiae (strain ATCC 204508 / S288c) GN=HXT3 PE=1 SV=1 - [HXT3_YEAST]	65.3428	13.58	5	15	28.6169	1.81±0.11	0.00581378
P49573	CTR1	Copper transport protein CTR1 OS=Saccharomyces cerevisiae (strain ATCC 204508 / S288c) GN=CTR1 PE=1 SV=1 - [CTR1_YEAST]	24.0364	11.82	4	7	23.4972	1.77±0.12	0.0078693
Q04307	RPC11	DNA-directed RNA polymerase III subunit RPC10 OS=Saccharomyces cerevisiae (strain ATCC 204508 / S288c) GN=RPC11 PE=1 SV=1 - [RPC10_YEAST]	33.0973	41.82	5	8	12.7322	1.74±0.17	0.0180488
P38143	GPX2	Glutathione peroxidase 2 OS=Saccharomyces cerevisiae (strain ATCC 204508 / S288c) GN=GPX2 PE=1 SV=1 - [GPX2_YEAST]	93.5242	70.37	8	26	24.9642	1.73±0.14	0.0124472
P53183	YGL039W	Putative uncharacterized oxidoreductase YGL039W OS=Saccharomyces cerevisiae (strain ATCC 204508 / S288c) GN=YGL039W PE=1 SV=1 - [YGD9_YEAST]	45.8716	27.59	8	13	23.7268	1.73±0.07	0.00304606
P33303	SFC1	Succinate/fumarate mitochondrial transporter OS=Saccharomyces cerevisiae (strain ATCC 204508 / S288c) GN=SFC1 PE=1 SV=2 - [SFC1_YEAST]	155.537	42.55	14	39	29.2922	1.67±0.13	0.0112712
Q06252	YLR179C	Uncharacterized protein YLR179C OS=Saccharomyces cerevisiae (strain ATCC 204508 / S288c) GN=YLR179C PE=1 SV=1 - [YL179_YEAST]	208.649	63.68	12	60	37.0567	1.66±0.19	0.0270904
P32467	HXT4	Low-affinity glucose transporter HXT4 OS=Saccharomyces cerevisiae (strain ATCC 204508 / S288c) GN=HXT4 PE=1 SV=1 - [HXT4_YEAST]	20.3142	9.72	4	6	10.4816	1.65±0.02	0.000464962
P38693	PHO12	Acid phosphatase PHO12 OS=Saccharomyces cerevisiae (strain ATCC 204508 / S288c) GN=PHO12 PE=1 SV=1 - [PPAC_YEAST]	165.229	35.55	14	43	37.9185	1.65±0.17	0.0210769
P23641	MIR1	Mitochondrial phosphate carrier protein OS=Saccharomyces cerevisiae (strain ATCC 204508 / S288c) GN=MIR1 PE=1 SV=1 - [MPCP_YEAST]	274.379	52.73	16	67	31.1704	1.65±0.03	0.000762171
Q3E7A3	YJL133C-A	Uncharacterized protein YJL133C-A OS=Saccharomyces cerevisiae (strain ATCC 204508 / S288c) GN=YJL133C-A PE=1 SV=1 - [YJ133_YEAST]	36.3266	47.3	4	9	19.8136	1.62±0.05	0.00192137
Q3E7Z5	YIL002W-A	Uncharacterized protein YIL002W-A OS=Saccharomyces cerevisiae (strain ATCC 204508 / S288c) GN=YIL002W-A PE=1 SV=1 - [YI002_YEAST]	43.5343	81.16	8	12	26.0135	1.61±0.22	0.0394772
P25379	CHA1	Catabolic L-serine/threonine dehydratase OS=Saccharomyces cerevisiae (strain ATCC 204508 / S288c) GN=CHA1 PE=1 SV=2 - [STDH_YEAST]	65.7601	31.67	8	16	37.9224	1.61±0.05	0.00235602
P21524	RNR1	Ribonucleoside-diphosphate reductase large chain 1 OS=Saccharomyces cerevisiae (strain ATCC 204508 / S288c) GN=RNR1 PE=1 SV=2 - [RIR1_YEAST]	104.42	21.28	18	29	34.5488	1.61±0.04	0.00134108
P49089	ASN1	Asparagine synthetase [glutamine-hydrolyzing] 1 OS=Saccharomyces cerevisiae (strain ATCC 204508 / S288c) GN=ASN1 PE=1 SV=2 - [ASNS1_YEAST]	520.774	58.74	24	138	27.9159	1.6±0.06	0.00358969
P04807	HXK2	Hexokinase-2 OS=Saccharomyces cerevisiae (strain ATCC 204508 / S288c) GN=HXK2 PE=1 SV=4 - [HXKB_YEAST]	1570.14	82.3	34	396	33.3437	1.59±0.09	0.00727119
Q99297	ODC2	Mitochondrial 2-oxodicarboxylate carrier 2 OS=Saccharomyces cerevisiae (strain ATCC 204508 / S288c) GN=ODC2 PE=1 SV=1 - [ODC2_YEAST]	10.5972	6.84	2	3	6.38417	1.59±0.19	0.0333246
P39533	ACO2	Homocitrate dehydratase, mitochondrial OS=Saccharomyces cerevisiae (strain ATCC 204508 / S288c) GN=ACO2 PE=1 SV=1 - [ACON2_YEAST]	141.943	29.66	19	40	34.7876	1.58±0.03	0.00120302
P38840	ARO9	Aromatic amino acid aminotransferase 2 OS=Saccharomyces cerevisiae (strain ATCC 204508 / S288c) GN=ARO9 PE=1 SV=3 - [ARO9_YEAST]	153.778	38.99	20	45	26.4536	1.58±0.15	0.0210599
P81451	ATP19	ATP synthase subunit K, mitochondrial OS=Saccharomyces cerevisiae (strain ATCC 204508 / S288c) GN=ATP19 PE=1 SV=1 - [ATP19_YEAST]	22.625	23.53	4	7	13.425	1.57±0.16	0.0244787
P53909	AAH1	Adenine deaminase OS=Saccharomyces cerevisiae (strain ATCC 204508 / S288c) GN=AAH1 PE=1 SV=1 - [ADE_YEAST]	13.9481	17	4	4	39.1991	1.56±0.1	0.00952881
P30902	ATP7	ATP synthase subunit d, mitochondrial OS=Saccharomyces cerevisiae (strain ATCC 204508 / S288c) GN=ATP7 PE=1 SV=2 - [ATP7_YEAST]	279.53	72.41	16	69	22.6033	1.56±0.09	0.00793153
Q06408	ARO10	Transaminated amino acid decarboxylase OS=Saccharomyces cerevisiae (strain ATCC 204508 / S288c) GN=ARO10 PE=1 SV=1 - [ARO10_YEAST]	169.171	47.72	22	46	30.8445	1.56±0.09	0.00883349
P40422	RPC10	DNA-directed RNA polymerases I, II, and III subunit RPABC4 OS=Saccharomyces cerevisiae (strain ATCC 204508 / S288c) GN=RPC10 PE=1 SV=1 - [RPAB4_YEAST]	57.0125	52.86	3	16	30.6698	1.55±0.12	0.0147306
P41277	GPP1	Glycerol-1-phosphate phosphohydrolase 1 OS=Saccharomyces cerevisiae (strain ATCC 204508 / S288c) GN=GPP1 PE=1 SV=3 - [GPP1_YEAST]	439.401	53.6	12	112	29.1915	1.55±0.16	0.0276245
Q04013	YHM2	Citrate/oxoglutarate carrier protein OS=Saccharomyces cerevisiae (strain ATCC 204508 / S288c) GN=YHM2 PE=1 SV=1 - [YHM2_YEAST]	81.2782	30.89	10	22	30.7932	1.55±0.09	0.00808738
P33331	NTF2	Nuclear transport factor 2 OS=Saccharomyces cerevisiae (strain ATCC 204508 / S288c) GN=NTF2 PE=1 SV=2 - [NTF2_YEAST]	167.188	56	7	41	24.1013	1.54±0.18	0.0341626
P25567	SRO9	RNA-binding protein SRO9 OS=Saccharomyces cerevisiae (strain ATCC 204508 / S288c) GN=SRO9 PE=1 SV=2 - [SRO9_YEAST]	146.74	39.17	13	35	27.5208	1.53±0.07	0.00594126
Q03028	ODC1	Mitochondrial 2-oxodicarboxylate carrier 1 OS=Saccharomyces cerevisiae (strain ATCC 204508 / S288c) GN=ODC1 PE=1 SV=1 - [ODC1_YEAST]	89.6898	30.32	12	25	30.1734	1.52±0.07	0.00603944
Q12289	CRC1	Mitochondrial carnitine carrier OS=Saccharomyces cerevisiae (strain ATCC 204508 / S288c) GN=CRC1 PE=1 SV=1 - [CRC1_YEAST]	113.619	50.76	14	33	35.7414	1.51±0.04	0.00176825
Q96VH4	HBN1	Putative nitroreductase HBN1 OS=Saccharomyces cerevisiae (strain ATCC 204508 / S288c) GN=HBN1 PE=1 SV=1 - [HBN1_YEAST]	41.4939	29.53	6	11	28.6296	1.51±0.15	0.0276295
Q99258	RIB3	3,4-dihydroxy-2-butanone 4-phosphate synthase OS=Saccharomyces cerevisiae (strain ATCC 204508 / S288c) GN=RIB3 PE=1 SV=1 - [RIB3_YEAST]	184.052	56.25	11	52	28.7976	1.5±0.11	0.0168316
Q08492	BUD21	Bud site selection protein 21 OS=Saccharomyces cerevisiae (strain ATCC 204508 / S288c) GN=BUD21 PE=1 SV=1 - [BUD21_YEAST]	35.33	29.44	4	8	14.9051	1.5±0.14	0.024346
P18239	PET9	ADP,ATP carrier protein 2 OS=Saccharomyces cerevisiae (strain ATCC 204508 / S288c) GN=PET9 PE=1 SV=2 - [ADT2_YEAST]	526.803	59.12	21	138	28.2818	1.5±0.08	0.00764753
P47143	ADO1	Adenosine kinase OS=Saccharomyces cerevisiae (strain ATCC 204508 / S288c) GN=ADO1 PE=1 SV=1 - [ADK_YEAST]	670.605	58.24	14	165	31.5888	1.5±0.14	0.0238192
P53281	LSB1	LAS seventeen-binding protein 1 OS=Saccharomyces cerevisiae (strain ATCC 204508 / S288c) GN=LSB1 PE=1 SV=1 - [LSB1_YEAST]	24.2597	28.63	4	6	19.9324	1.49±0.12	0.0206754
P38086	RDH54	DNA repair and recombination protein RDH54 OS=Saccharomyces cerevisiae (strain ATCC 204508 / S288c) GN=RDH54 PE=1 SV=4 - [RDH54_YEAST]	16.7517	7.72	5	5	10.9329	1.49±0.07	0.00757912
P28272	URA1	Dihydroorotate dehydrogenase (fumarate) OS=Saccharomyces cerevisiae (strain ATCC 204508 / S288c) GN=URA1 PE=1 SV=1 - [PYRD_YEAST]	301.211	44.59	13	91	26.0878	1.49±0.09	0.011318
Q96VH5	MIC10	MICOS complex subunit MIC10 OS=Saccharomyces cerevisiae (strain ATCC 204508 / S288c) GN=MIC10 PE=1 SV=1 - [MIC10_YEAST]	25.4814	31.96	3	7	17.5514	1.49±0.17	0.0400025
Q06580	MLC2	Myosin light chain 2 OS=Saccharomyces cerevisiae (strain ATCC 204508 / S288c) GN=MLC2 PE=1 SV=1 - [MLC2_YEAST]	19.789	22.7	3	5	12.8971	1.49±0.09	0.0108663
P24482	DPB2	DNA polymerase epsilon subunit B OS=Saccharomyces cerevisiae (strain ATCC 204508 / S288c) GN=DPB2 PE=1 SV=3 - [DPB2_YEAST]	9.59528	4.79	2	3	15.9294	1.49±0.04	0.00252319
P42941	SER2	Phosphoserine phosphatase OS=Saccharomyces cerevisiae (strain ATCC 204508 / S288c) GN=SER2 PE=1 SV=1 - [SERB_YEAST]	122.734	37.86	14	32	21.9287	1.48±0.1	0.0131504
P24783	DBP2	ATP-dependent RNA helicase DBP2 OS=Saccharomyces cerevisiae (strain ATCC 204508 / S288c) GN=DBP2 PE=1 SV=1 - [DBP2_YEAST]	171.62	40.48	21	47	27.0191	1.48±0.05	0.00322321
P40007	NOP16	Nucleolar protein 16 OS=Saccharomyces cerevisiae (strain ATCC 204508 / S288c) GN=NOP16 PE=1 SV=1 - [NOP16_YEAST]	37.1203	28.14	7	11	14.079	1.48±0.11	0.0160963
P28000	RPC19	DNA-directed RNA polymerases I and III subunit RPAC2 OS=Saccharomyces cerevisiae (strain ATCC 204508 / S288c) GN=RPC19 PE=1 SV=1 - [RPAC2_YEAST]	185.741	83.8	8	42	22.3383	1.48±0.1	0.0150343
Q12029	FSF1	Probable mitochondrial transport protein FSF1 OS=Saccharomyces cerevisiae (strain ATCC 204508 / S288c) GN=FSF1 PE=1 SV=1 - [FSF1_YEAST]	62.5539	19.88	7	16	30.076	1.47±0.02	0.00049712
Q06106	MRD1	Multiple RNA-binding domain-containing protein 1 OS=Saccharomyces cerevisiae (strain ATCC 204508 / S288c) GN=MRD1 PE=1 SV=1 - [MRD1_YEAST]	23.8117	8.34	5	6	36.5535	1.47±0.07	0.00703587
Q06405	ATP17	ATP synthase subunit f, mitochondrial OS=Saccharomyces cerevisiae (strain ATCC 204508 / S288c) GN=ATP17 PE=1 SV=1 - [ATPK_YEAST]	48.9433	29.7	4	13	21.7293	1.47±0.04	0.00205873
P48231	TCB2	Tricalbin-2 OS=Saccharomyces cerevisiae (strain ATCC 204508 / S288c) GN=TCB2 PE=1 SV=1 - [TCB2_YEAST]	17.2162	4.16	2	5	18.4362	1.47±0.11	0.0178936
Q03558	OYE2	NADPH dehydrogenase 2 OS=Saccharomyces cerevisiae (strain ATCC 204508 / S288c) GN=OYE2 PE=1 SV=3 - [OYE2_YEAST]	742.044	77.75	30	192	30.4637	1.46±0.08	0.00924051
P54115	ALD6	Magnesium-activated aldehyde dehydrogenase, cytosolic OS=Saccharomyces cerevisiae (strain ATCC 204508 / S288c) GN=ALD6 PE=1 SV=4 - [ALDH6_YEAST]	1304.14	82	42	317	26.867	1.46±0.05	0.00339711
P50106	RPA14	DNA-directed RNA polymerase I subunit RPA14 OS=Saccharomyces cerevisiae (strain ATCC 204508 / S288c) GN=RPA14 PE=1 SV=1 - [RPA14_YEAST]	61.0414	24.82	4	13	19.1856	1.45±0.03	0.00173777
P0C0X0	RPS28B	40S ribosomal protein S28-B OS=Saccharomyces cerevisiae (strain ATCC 204508 / S288c) GN=RPS28B PE=1 SV=1 - [RS28B_YEAST]	359.944	56.72	8	95	29.4266	1.45±0.12	0.0228671
Q3E7B7	YDL085C-A	SERF-like protein YDL085C-A OS=Saccharomyces cerevisiae (strain ATCC 204508 / S288c) GN=YDL085C-A PE=1 SV=1 - [YD85C_YEAST]	12.0803	26.47	3	4	8.23829	1.45±0.16	0.040878
P39990	SNU13	13 kDa ribonucleoprotein-associated protein OS=Saccharomyces cerevisiae (strain ATCC 204508 / S288c) GN=SNU13 PE=1 SV=1 - [SNU13_YEAST]	92.9628	32.54	4	24	24.4829	1.45±0.1	0.0171874
Q12233	ATP20	ATP synthase subunit g, mitochondrial OS=Saccharomyces cerevisiae (strain ATCC 204508 / S288c) GN=ATP20 PE=1 SV=1 - [ATPN_YEAST]	75.2735	52.17	7	21	32.2179	1.45±0.09	0.0135837
P40312	CYB5	Cytochrome b5 OS=Saccharomyces cerevisiae (strain ATCC 204508 / S288c) GN=CYB5 PE=1 SV=2 - [CYB5_YEAST]	7.85184	18.33	2	2	33.8387	1.44±0.08	0.011864
Q12452	ERG27	3-keto-steroid reductase OS=Saccharomyces cerevisiae (strain ATCC 204508 / S288c) GN=ERG27 PE=1 SV=1 - [ERG27_YEAST]	19.4554	13.54	6	6	13.8218	1.44±0.08	0.00948136
P49367	LYS4	Homoaconitase, mitochondrial OS=Saccharomyces cerevisiae (strain ATCC 204508 / S288c) GN=LYS4 PE=1 SV=1 - [LYS4_YEAST]	148.041	36.22	17	38	18.2151	1.44±0.05	0.00423932
P32583	SRP40	Suppressor protein SRP40 OS=Saccharomyces cerevisiae (strain ATCC 204508 / S288c) GN=SRP40 PE=1 SV=2 - [SRP40_YEAST]	36.7549	14.78	6	11	19.865	1.44±0.07	0.00939387
P16521	YEF3	Elongation factor 3A OS=Saccharomyces cerevisiae (strain ATCC 204508 / S288c) GN=YEF3 PE=1 SV=4 - [EF3A_YEAST]	1746.58	55.56	53	454	31.1313	1.44±0.1	0.018308
Q12247	FYV7	rRNA-processing protein FYV7 OS=Saccharomyces cerevisiae (strain ATCC 204508 / S288c) GN=FYV7 PE=1 SV=1 - [FYV7_YEAST]	11.6842	15.89	2	4	8.99375	1.44±0.16	0.0401856
P38988	GGC1	Mitochondrial GTP/GDP carrier protein 1 OS=Saccharomyces cerevisiae (strain ATCC 204508 / S288c) GN=GGC1 PE=1 SV=1 - [GGC1_YEAST]	63.2963	41.33	12	18	17.2425	1.44±0.02	0.000879155
P39676	YHB1	Flavohemoprotein OS=Saccharomyces cerevisiae (strain ATCC 204508 / S288c) GN=YHB1 PE=1 SV=2 - [FHP_YEAST]	858.438	79.45	24	209	31.5599	1.44±0.07	0.00897332
P39715	ECM1	Shuttling pre-60S factor ECM1 OS=Saccharomyces cerevisiae (strain ATCC 204508 / S288c) GN=ECM1 PE=1 SV=2 - [ECM1_YEAST]	10.5083	22.17	3	3	13.5223	1.44±0.09	0.0138139
Q00245	RHO3	GTP-binding protein RHO3 OS=Saccharomyces cerevisiae (strain ATCC 204508 / S288c) GN=RHO3 PE=1 SV=2 - [RHO3_YEAST]	73.0699	36.8	9	19	25.358	1.43±0.02	0.00100743
P07255	COX9	Cytochrome c oxidase subunit 7A OS=Saccharomyces cerevisiae (strain ATCC 204508 / S288c) GN=COX9 PE=1 SV=2 - [COX9_YEAST]	18.122	35.59	3	6	8.45273	1.43±0.09	0.0146665
P38858	SOL3	6-phosphogluconolactonase 3 OS=Saccharomyces cerevisiae (strain ATCC 204508 / S288c) GN=SOL3 PE=1 SV=2 - [SOL3_YEAST]	179.99	62.65	16	49	17.8432	1.43±0.15	0.0372834
Q08581	SLK19	Kinetochore protein SLK19 OS=Saccharomyces cerevisiae (strain ATCC 204508 / S288c) GN=SLK19 PE=1 SV=1 - [SLK19_YEAST]	33.3307	9.62	6	10	16.5467	1.43±0.03	0.00207006
P36013	MAE1	NAD-dependent malic enzyme, mitochondrial OS=Saccharomyces cerevisiae (strain ATCC 204508 / S288c) GN=MAE1 PE=1 SV=1 - [MAOM_YEAST]	353.809	55.31	28	85	37.9791	1.42±0.03	0.00118597
P10592	SSA2	Heat shock protein SSA2 OS=Saccharomyces cerevisiae (strain ATCC 204508 / S288c) GN=SSA2 PE=1 SV=3 - [HSP72_YEAST]	4337.93	78.87	15	1045	34.1581	1.42±0.05	0.00530888
P39926	SSO2	Protein SSO2 OS=Saccharomyces cerevisiae (strain ATCC 204508 / S288c) GN=SSO2 PE=1 SV=2 - [SSO2_YEAST]	40.1795	16.61	3	12	9.82202	1.42±0.05	0.00564127
P87108	TIM10	Mitochondrial import inner membrane translocase subunit TIM10 OS=Saccharomyces cerevisiae (strain ATCC 204508 / S288c) GN=TIM10 PE=1 SV=1 - [TIM10_YEAST]	107.399	76.34	7	28	28.1896	1.41±0.15	0.042174
Q12263	GIN4	Serine/threonine-protein kinase GIN4 OS=Saccharomyces cerevisiae (strain ATCC 204508 / S288c) GN=GIN4 PE=1 SV=1 - [GIN4_YEAST]	11.6022	3.33	3	3	16.4242	1.41±0.11	0.0238095
P32875	LIP5	Lipoyl synthase, mitochondrial OS=Saccharomyces cerevisiae (strain ATCC 204508 / S288c) GN=LIP5 PE=1 SV=1 - [LIPA_YEAST]	39.1438	23.43	8	12	21.2171	1.41±0.11	0.0236982
P53259	PCP1	Rhomboid protein 1, mitochondrial OS=Saccharomyces cerevisiae (strain ATCC 204508 / S288c) GN=PCP1 PE=1 SV=1 - [PCP1_YEAST]	6.45796	5.78	2	2	13.555	1.41±0.09	0.0157713
P07257	QCR2	Cytochrome b-c1 complex subunit 2, mitochondrial OS=Saccharomyces cerevisiae (strain ATCC 204508 / S288c) GN=QCR2 PE=1 SV=1 - [QCR2_YEAST]	692.253	72.55	37	167	28.8177	1.41±0.04	0.00312309
Q08045	LCL2	Long chronological lifespan protein 2 OS=Saccharomyces cerevisiae (strain ATCC 204508 / S288c) GN=LCL2 PE=1 SV=1 - [LCL2_YEAST]	5.52284	16.03	2	2	19.1533	1.4±0.09	0.0165598
Q03103	ERO1	Endoplasmic oxidoreductin-1 OS=Saccharomyces cerevisiae (strain ATCC 204508 / S288c) GN=ERO1 PE=1 SV=1 - [ERO1_YEAST]	35.7985	12.61	5	10	15.1885	1.4±0.05	0.00444765
P40893	REE1	Regulation of enolase protein 1 OS=Saccharomyces cerevisiae (strain ATCC 204508 / S288c) GN=REE1 PE=1 SV=1 - [REE1_YEAST]	375.191	82.32	15	94	36.5445	1.4±0.04	0.00322023
P00128	QCR7	Cytochrome b-c1 complex subunit 7 OS=Saccharomyces cerevisiae (strain ATCC 204508 / S288c) GN=QCR7 PE=1 SV=2 - [QCR7_YEAST]	250.863	78.74	10	61	29.5933	1.4±0.04	0.00289088
P07256	COR1	Cytochrome b-c1 complex subunit 1, mitochondrial OS=Saccharomyces cerevisiae (strain ATCC 204508 / S288c) GN=COR1 PE=1 SV=1 - [QCR1_YEAST]	339.216	64.11	26	90	30.0005	1.4±0.08	0.0141826
P15454	GUK1	Guanylate kinase OS=Saccharomyces cerevisiae (strain ATCC 204508 / S288c) GN=GUK1 PE=1 SV=2 - [KGUA_YEAST]	353.635	80.21	18	89	24.0561	1.4±0.13	0.0344515
P00812	CAR1	Arginase OS=Saccharomyces cerevisiae (strain ATCC 204508 / S288c) GN=CAR1 PE=1 SV=1 - [ARGI_YEAST]	177.194	49.85	14	50	24.5339	1.4±0.06	0.00684032
P38891	BAT1	Branched-chain-amino-acid aminotransferase, mitochondrial OS=Saccharomyces cerevisiae (strain ATCC 204508 / S288c) GN=BAT1 PE=1 SV=1 - [BCA1_YEAST]	423.005	69.72	21	103	23.0259	1.4±0.03	0.00254445
P15700	URA6	Uridylate kinase OS=Saccharomyces cerevisiae (strain ATCC 204508 / S288c) GN=URA6 PE=1 SV=1 - [KCY_YEAST]	188.162	53.92	14	55	20.8417	1.4±0.12	0.0281101
Q03532	HAS1	ATP-dependent RNA helicase HAS1 OS=Saccharomyces cerevisiae (strain ATCC 204508 / S288c) GN=HAS1 PE=1 SV=1 - [HAS1_YEAST]	74.8571	24.16	12	21	18.5153	1.4±0.04	0.00329277
P38697	IMD2	Inosine-5'-monophosphate dehydrogenase 2 OS=Saccharomyces cerevisiae (strain ATCC 204508 / S288c) GN=IMD2 PE=1 SV=1 - [IMDH2_YEAST]	565.956	53.54	7	121	32.8644	1.39±0.06	0.00703076
Q3E833	PCC1	EKC/KEOPS complex subunit PCC1 OS=Saccharomyces cerevisiae (strain ATCC 204508 / S288c) GN=PCC1 PE=1 SV=1 - [PCC1_YEAST]	37.1497	44.32	3	10	28.286	1.39±0.03	0.0017069
P08679	CIT2	Citrate synthase, peroxisomal OS=Saccharomyces cerevisiae (strain ATCC 204508 / S288c) GN=CIT2 PE=1 SV=1 - [CISY2_YEAST]	470.691	50.22	23	124	25.3294	1.39±0.06	0.00785335
Q12166	LEU9	2-isopropylmalate synthase 2, mitochondrial OS=Saccharomyces cerevisiae (strain ATCC 204508 / S288c) GN=LEU9 PE=1 SV=1 - [LEU9_YEAST]	182.793	34.44	5	48	21.8893	1.39±0.04	0.00308565
P53883	NOP13	Nucleolar protein 13 OS=Saccharomyces cerevisiae (strain ATCC 204508 / S288c) GN=NOP13 PE=1 SV=2 - [NOP13_YEAST]	43.7162	26.55	11	13	13.5404	1.39±0.09	0.0187229
P11491	PHO8	Repressible alkaline phosphatase OS=Saccharomyces cerevisiae (strain ATCC 204508 / S288c) GN=PHO8 PE=1 SV=2 - [PPB_YEAST]	67.3836	25.27	10	19	28.7951	1.39±0.02	0.00104951
P42949	PAM16	Mitochondrial import inner membrane translocase subunit TIM16 OS=Saccharomyces cerevisiae (strain ATCC 204508 / S288c) GN=PAM16 PE=1 SV=1 - [TIM16_YEAST]	70.5303	63.09	9	20	17.5452	1.39±0.07	0.0107613
P09950	HEM1	5-aminolevulinate synthase, mitochondrial OS=Saccharomyces cerevisiae (strain ATCC 204508 / S288c) GN=HEM1 PE=1 SV=1 - [HEM1_YEAST]	70.2331	25.91	11	18	22.0587	1.39±0.11	0.0255924
Q6Q547	NOP10	H/ACA ribonucleoprotein complex subunit 3 OS=Saccharomyces cerevisiae (strain ATCC 204508 / S288c) GN=NOP10 PE=1 SV=1 - [NOP10_YEAST]	43.1467	55.17	4	13	23.1126	1.38±0.04	0.00338028
P25654	YCR090C	UPF0587 protein YCR090C OS=Saccharomyces cerevisiae (strain ATCC 204508 / S288c) GN=YCR090C PE=1 SV=1 - [YCY0_YEAST]	59.1251	28.02	4	15	20.9629	1.38±0.11	0.027789
P38264	PHO88	SRP-independent targeting protein 3 OS=Saccharomyces cerevisiae (strain ATCC 204508 / S288c) GN=PHO88 PE=1 SV=1 - [PHO88_YEAST]	137.943	52.66	12	38	23.3521	1.38±0.01	0.000216766
Q12428	PDH1	Probable 2-methylcitrate dehydratase OS=Saccharomyces cerevisiae (strain ATCC 204508 / S288c) GN=PDH1 PE=1 SV=1 - [PRPD_YEAST]	410.919	58.72	29	100	27.3457	1.37±0.04	0.00403052
Q02725	VTC3	Vacuolar transporter chaperone 3 OS=Saccharomyces cerevisiae (strain ATCC 204508 / S288c) GN=VTC3 PE=1 SV=1 - [VTC3_YEAST]	131.241	31.02	23	38	28.3931	1.37±0.05	0.00602011
Q08985	SAM4	Homocysteine S-methyltransferase 2 OS=Saccharomyces cerevisiae (strain ATCC 204508 / S288c) GN=SAM4 PE=1 SV=1 - [SAM4_YEAST]	135.499	48.92	16	33	24.8643	1.37±0.06	0.00910771
P18494	GLN3	Nitrogen regulatory protein GLN3 OS=Saccharomyces cerevisiae (strain ATCC 204508 / S288c) GN=GLN3 PE=1 SV=2 - [GLN3_YEAST]	9.11343	2.33	2	3	5.84332	1.37±0.09	0.0175723
P47120	LIA1	Deoxyhypusine hydroxylase OS=Saccharomyces cerevisiae (strain ATCC 204508 / S288c) GN=LIA1 PE=1 SV=1 - [DOHH_YEAST]	225.57	67.08	16	55	22.7769	1.37±0.06	0.00886427
Q04214	TY1B-MR1	Transposon Ty1-MR1 Gag-Pol polyprotein OS=Saccharomyces cerevisiae (strain ATCC 204508 / S288c) GN=TY1B-MR1 PE=1 SV=2 - [YM13B_YEAST]	206.551	14.93	2	58	14.1837	1.37±0.11	0.0301197
P32288	GLN1	Glutamine synthetase OS=Saccharomyces cerevisiae (strain ATCC 204508 / S288c) GN=GLN1 PE=1 SV=4 - [GLNA_YEAST]	417.354	62.16	18	113	34.333	1.37±0.08	0.0148163
Q05905	HRI1	Protein HRI1 OS=Saccharomyces cerevisiae (strain ATCC 204508 / S288c) GN=HRI1 PE=1 SV=1 - [HRI1_YEAST]	243.152	62.7	15	57	22.718	1.37±0.03	0.00243677
Q03323	SDC1	COMPASS component SDC1 OS=Saccharomyces cerevisiae (strain ATCC 204508 / S288c) GN=SDC1 PE=1 SV=1 - [SDC1_YEAST]	44.302	40.57	6	13	18.4127	1.37±0.13	0.0391997
Q12031	ICL2	Mitochondrial 2-methylisocitrate lyase OS=Saccharomyces cerevisiae (strain ATCC 204508 / S288c) GN=ICL2 PE=1 SV=1 - [ACEB_YEAST]	156.679	41.04	22	43	27.0011	1.36±0.03	0.0021192
P38300	MBA1	Inner membrane mitoribosome receptor MBA1, mitochondrial OS=Saccharomyces cerevisiae (strain ATCC 204508 / S288c) GN=MBA1 PE=1 SV=1 - [MBA1_YEAST]	6.45036	7.55	2	2	29.9291	1.36±0.05	0.00701668
P23292	YCK2	Casein kinase I homolog 2 OS=Saccharomyces cerevisiae (strain ATCC 204508 / S288c) GN=YCK2 PE=1 SV=1 - [KC12_YEAST]	30.2668	21.43	7	10	26.5445	1.36±0.08	0.0144029
P22139	RPB10	DNA-directed RNA polymerases I, II, and III subunit RPABC5 OS=Saccharomyces cerevisiae (strain ATCC 204508 / S288c) GN=RPB10 PE=1 SV=2 - [RPAB5_YEAST]	21.5433	17.14	2	6	20.5564	1.36±0.13	0.0381698
P50945	MIC27	MICOS complex subunit MIC27 OS=Saccharomyces cerevisiae (strain ATCC 204508 / S288c) GN=MIC27 PE=1 SV=1 - [MIC27_YEAST]	9.21743	17.95	3	3	10.4997	1.36±0.07	0.0118836
P38787	PAN5	2-dehydropantoate 2-reductase OS=Saccharomyces cerevisiae (strain ATCC 204508 / S288c) GN=PAN5 PE=1 SV=1 - [PANE_YEAST]	78.5027	37.99	12	22	31.4267	1.36±0.06	0.0087209
P16474	KAR2	78 kDa glucose-regulated protein homolog OS=Saccharomyces cerevisiae (strain ATCC 204508 / S288c) GN=KAR2 PE=1 SV=1 - [GRP78_YEAST]	826.923	54.55	46	217	25.6418	1.36±0.08	0.0169458
P53753	DSE4	Endo-1,3(4)-beta-glucanase 1 OS=Saccharomyces cerevisiae (strain ATCC 204508 / S288c) GN=DSE4 PE=1 SV=1 - [ENG1_YEAST]	48.991	9.58	6	13	12.4797	1.36±0.14	0.0465735
P32528	DUR1,2	Urea amidolyase OS=Saccharomyces cerevisiae (strain ATCC 204508 / S288c) GN=DUR1,2 PE=1 SV=2 - [DUR1_YEAST]	98.5413	15.15	21	28	20.2936	1.36±0.1	0.0276267
P53920	NMA111	Pro-apoptotic serine protease NMA111 OS=Saccharomyces cerevisiae (strain ATCC 204508 / S288c) GN=NMA111 PE=1 SV=1 - [NM111_YEAST]	63.5139	18.46	14	19	13.6208	1.36±0.05	0.00716708
Q07540	YFH1	Frataxin homolog, mitochondrial OS=Saccharomyces cerevisiae (strain ATCC 204508 / S288c) GN=YFH1 PE=1 SV=1 - [FRDA_YEAST]	31.9683	13.79	2	9	21.9189	1.35±0.13	0.0436401
P32529	RPA12	DNA-directed RNA polymerase I subunit RPA12 OS=Saccharomyces cerevisiae (strain ATCC 204508 / S288c) GN=RPA12 PE=1 SV=1 - [RPA12_YEAST]	75.2488	56	6	18	36.7646	1.35±0.1	0.027521
P21657	DAL81	Transcriptional activator protein DAL81 OS=Saccharomyces cerevisiae (strain ATCC 204508 / S288c) GN=DAL81 PE=1 SV=3 - [DAL81_YEAST]	9.38069	7.22	3	3	17.3755	1.35±0.01	0.000111348
P05626	ATP4	ATP synthase subunit 4, mitochondrial OS=Saccharomyces cerevisiae (strain ATCC 204508 / S288c) GN=ATP4 PE=1 SV=2 - [ATPF_YEAST]	154.926	48.36	16	39	25.8998	1.35±0.13	0.0452763
P38910	HSP10	10 kDa heat shock protein, mitochondrial OS=Saccharomyces cerevisiae (strain ATCC 204508 / S288c) GN=HSP10 PE=1 SV=1 - [CH10_YEAST]	329.048	83.02	12	83	29.5247	1.35±0.12	0.0358625
P36080	RRP14	Ribosomal RNA-processing protein 14 OS=Saccharomyces cerevisiae (strain ATCC 204508 / S288c) GN=RRP14 PE=1 SV=1 - [RRP14_YEAST]	22.1551	13.13	4	6	23.4479	1.35±0.09	0.0194831
P52910	ACS2	Acetyl-coenzyme A synthetase 2 OS=Saccharomyces cerevisiae (strain ATCC 204508 / S288c) GN=ACS2 PE=1 SV=1 - [ACS2_YEAST]	456.876	49.05	30	116	32.4007	1.35±0.02	0.00164155
P18496	ATP10	Mitochondrial ATPase complex subunit ATP10 OS=Saccharomyces cerevisiae (strain ATCC 204508 / S288c) GN=ATP10 PE=1 SV=2 - [ATP10_YEAST]	26.1409	26.52	6	7	18.461	1.35±0.04	0.00559295
Q86ZR7	YKL033W-A	Putative uncharacterized hydrolase YKL033W-A OS=Saccharomyces cerevisiae (strain ATCC 204508 / S288c) GN=YKL033W-A PE=3 SV=2 - [YKD3A_YEAST]	51.1325	42.37	9	14	19.1299	1.34±0.05	0.00803429
Q07623	NOP6	Nucleolar protein 6 OS=Saccharomyces cerevisiae (strain ATCC 204508 / S288c) GN=NOP6 PE=1 SV=1 - [NOP6_YEAST]	60.4824	36.89	7	14	25.2639	1.34±0.05	0.00654808
P21306	ATP15	ATP synthase subunit epsilon, mitochondrial OS=Saccharomyces cerevisiae (strain ATCC 204508 / S288c) GN=ATP15 PE=1 SV=2 - [ATP5E_YEAST]	146.587	90.32	5	37	26.2157	1.34±0.12	0.0381699
P13856	RSR1	Ras-related protein RSR1 OS=Saccharomyces cerevisiae (strain ATCC 204508 / S288c) GN=RSR1 PE=3 SV=1 - [RSR1_YEAST]	15.5307	14.34	4	5	10.6013	1.34±0.06	0.00866162
P00724	SUC2	Invertase 2 OS=Saccharomyces cerevisiae (strain ATCC 204508 / S288c) GN=SUC2 PE=1 SV=1 - [INV2_YEAST]	113.712	34.96	17	31	25.6452	1.34±0.06	0.0116982
P38773	DOG2	2-deoxyglucose-6-phosphate phosphatase 2 OS=Saccharomyces cerevisiae (strain ATCC 204508 / S288c) GN=DOG2 PE=1 SV=1 - [DOG2_YEAST]	97.2359	39.02	10	26	17.0168	1.34±0.03	0.00308371
P27616	ADE1	Phosphoribosylaminoimidazole-succinocarboxamide synthase OS=Saccharomyces cerevisiae (strain ATCC 204508 / S288c) GN=ADE1 PE=1 SV=2 - [PUR7_YEAST]	732.656	89.87	37	178	29.6455	1.34±0.03	0.00233275
P36160	RPF2	Ribosome biogenesis protein RPF2 OS=Saccharomyces cerevisiae (strain ATCC 204508 / S288c) GN=RPF2 PE=1 SV=1 - [RPF2_YEAST]	26.0556	13.95	5	8	20.9686	1.34±0.03	0.00207717
P34078	LTV1	Protein LTV1 OS=Saccharomyces cerevisiae (strain ATCC 204508 / S288c) GN=LTV1 PE=1 SV=2 - [LTV1_YEAST]	21.3197	15.55	6	6	11.4422	1.34±0.06	0.00933031
P0CW40	IMA3	Oligo-1,6-glucosidase IMA3 OS=Saccharomyces cerevisiae (strain ATCC 204508 / S288c) GN=IMA3 PE=1 SV=1 - [MALX2_YEAST]	41.4172	18.51	8	12	16.4466	1.33±0.01	0.000506444
P34220	YBL055C	Deoxyribonuclease Tat-D OS=Saccharomyces cerevisiae (strain ATCC 204508 / S288c) GN=YBL055C PE=1 SV=1 - [YBF5_YEAST]	39.517	24.16	8	10	9.31792	1.33±0.02	0.00074191
O74700	TIM9	Mitochondrial import inner membrane translocase subunit TIM9 OS=Saccharomyces cerevisiae (strain ATCC 204508 / S288c) GN=TIM9 PE=1 SV=1 - [TIM9_YEAST]	73.5009	66.67	7	20	22.9423	1.33±0.1	0.0300389
P40215	NDE1	External NADH-ubiquinone oxidoreductase 1, mitochondrial OS=Saccharomyces cerevisiae (strain ATCC 204508 / S288c) GN=NDE1 PE=1 SV=1 - [NDH1_YEAST]	262.551	47.5	28	72	27.6456	1.33±0.12	0.0395994
P32332	OAC1	Mitochondrial oxaloacetate transport protein OS=Saccharomyces cerevisiae (strain ATCC 204508 / S288c) GN=OAC1 PE=1 SV=1 - [OAC1_YEAST]	10.688	12.96	3	3	33.8792	1.33±0.01	7.95034e-05
P52553	YKE2	Prefoldin subunit 6 OS=Saccharomyces cerevisiae (strain ATCC 204508 / S288c) GN=YKE2 PE=1 SV=1 - [PFD6_YEAST]	189.696	78.07	10	48	23.4994	1.33±0.08	0.0195867
P40047	ALD5	Aldehyde dehydrogenase 5, mitochondrial OS=Saccharomyces cerevisiae (strain ATCC 204508 / S288c) GN=ALD5 PE=1 SV=4 - [ALDH5_YEAST]	228.504	39.62	18	60	19.032	1.33±0.08	0.0190905
P50094	IMD4	Inosine-5'-monophosphate dehydrogenase 4 OS=Saccharomyces cerevisiae (strain ATCC 204508 / S288c) GN=IMD4 PE=1 SV=1 - [IMDH4_YEAST]	646.134	64.89	16	154	22.6252	1.33±0.06	0.0112553
P28241	IDH2	Isocitrate dehydrogenase [NAD] subunit 2, mitochondrial OS=Saccharomyces cerevisiae (strain ATCC 204508 / S288c) GN=IDH2 PE=1 SV=1 - [IDH2_YEAST]	584.72	72.36	22	143	20.9426	1.33±0.03	0.00240752
P53742	NOG2	Nucleolar GTP-binding protein 2 OS=Saccharomyces cerevisiae (strain ATCC 204508 / S288c) GN=NOG2 PE=1 SV=1 - [NOG2_YEAST]	32.3355	14.4	7	9	10.972	1.33±0.06	0.0106218
P52893	ALT1	Probable alanine aminotransferase, mitochondrial OS=Saccharomyces cerevisiae (strain ATCC 204508 / S288c) GN=ALT1 PE=1 SV=1 - [ALAM_YEAST]	152.568	31.08	12	38	20.6385	1.33±0.01	0.000506971
P33302	PDR5	Pleiotropic ABC efflux transporter of multiple drugs OS=Saccharomyces cerevisiae (strain ATCC 204508 / S288c) GN=PDR5 PE=1 SV=1 - [PDR5_YEAST]	43.3833	9.07	9	13	19.1211	1.33±0.1	0.0286151
Q02785	PDR12	ATP-dependent permease PDR12 OS=Saccharomyces cerevisiae (strain ATCC 204508 / S288c) GN=PDR12 PE=1 SV=1 - [PDR12_YEAST]	11.8136	3.18	3	3	9.49069	1.33±0.08	0.017793
P32911	SUI1	Eukaryotic translation initiation factor eIF-1 OS=Saccharomyces cerevisiae (strain ATCC 204508 / S288c) GN=SUI1 PE=1 SV=1 - [SUI1_YEAST]	217.757	75	11	48	29.5618	1.33±0.12	0.0413966
P53111	ARI1	NADPH-dependent aldehyde reductase ARI1 OS=Saccharomyces cerevisiae (strain ATCC 204508 / S288c) GN=ARI1 PE=1 SV=1 - [ARI1_YEAST]	54.5113	30.84	9	16	19.2339	1.33±0.04	0.00434642
P39742	SEC72	Translocation protein SEC72 OS=Saccharomyces cerevisiae (strain ATCC 204508 / S288c) GN=SEC72 PE=1 SV=3 - [SEC72_YEAST]	31.2534	24.87	6	9	21.0374	1.32±0.12	0.041422
P00890	CIT1	Citrate synthase, mitochondrial OS=Saccharomyces cerevisiae (strain ATCC 204508 / S288c) GN=CIT1 PE=1 SV=2 - [CISY1_YEAST]	1050.04	47.81	30	284	29.593	1.32±0.03	0.00244907
P38861	NMD3	60S ribosomal export protein NMD3 OS=Saccharomyces cerevisiae (strain ATCC 204508 / S288c) GN=NMD3 PE=1 SV=3 - [NMD3_YEAST]	62.6402	24.13	9	17	20.0961	1.32±0.07	0.0134438
P42847	MRPS18	37S ribosomal protein S18, mitochondrial OS=Saccharomyces cerevisiae (strain ATCC 204508 / S288c) GN=MRPS18 PE=1 SV=2 - [RT18_YEAST]	35.0231	41.94	7	10	14.8917	1.32±0.1	0.0302944
P32264	PRO1	Glutamate 5-kinase OS=Saccharomyces cerevisiae (strain ATCC 204508 / S288c) GN=PRO1 PE=1 SV=2 - [PROB_YEAST]	123.726	53.04	17	33	23.4069	1.32±0.06	0.0127606
Q12179	YPL245W	Uncharacterized protein YPL245W OS=Saccharomyces cerevisiae (strain ATCC 204508 / S288c) GN=YPL245W PE=1 SV=1 - [YP245_YEAST]	12.8633	11.89	4	4	9.40278	1.32±0.06	0.0111607
P01120	RAS2	Ras-like protein 2 OS=Saccharomyces cerevisiae (strain ATCC 204508 / S288c) GN=RAS2 PE=1 SV=4 - [RAS2_YEAST]	118.06	65.84	16	29	18.0222	1.32±0.11	0.0362027
Q04344	HNT1	Hit family protein 1 OS=Saccharomyces cerevisiae (strain ATCC 204508 / S288c) GN=HNT1 PE=1 SV=2 - [HNT1_YEAST]	216.804	67.72	10	53	22.7998	1.32±0.11	0.0412456
Q3E7Y6	NBL1	N-terminal-borealin-like protein OS=Saccharomyces cerevisiae (strain ATCC 204508 / S288c) GN=NBL1 PE=1 SV=1 - [NBL1_YEAST]	5.87955	32.88	2	2	4.28581	1.31±0.05	0.00957251
P20051	URA4	Dihydroorotase OS=Saccharomyces cerevisiae (strain ATCC 204508 / S288c) GN=URA4 PE=1 SV=2 - [PYRC_YEAST]	224.833	46.7	15	55	35.3265	1.31±0.06	0.0131098
Q03201	RSM10	37S ribosomal protein S10, mitochondrial OS=Saccharomyces cerevisiae (strain ATCC 204508 / S288c) GN=RSM10 PE=1 SV=1 - [RT10_YEAST]	44.6225	31.53	5	12	13.1555	1.31±0.09	0.0244247
P08067	RIP1	Cytochrome b-c1 complex subunit Rieske, mitochondrial OS=Saccharomyces cerevisiae (strain ATCC 204508 / S288c) GN=RIP1 PE=1 SV=1 - [UCRI_YEAST]	157.279	50.23	12	46	23.4262	1.31±0.1	0.0321423
P09440	MIS1	C-1-tetrahydrofolate synthase, mitochondrial OS=Saccharomyces cerevisiae (strain ATCC 204508 / S288c) GN=MIS1 PE=1 SV=1 - [C1TM_YEAST]	221.716	36.72	32	61	16.2382	1.31±0.04	0.00489675
Q02784	GRX5	Monothiol glutaredoxin-5, mitochondrial OS=Saccharomyces cerevisiae (strain ATCC 204508 / S288c) GN=GRX5 PE=1 SV=1 - [GLRX5_YEAST]	184.832	73.33	9	46	25.1424	1.31±0.08	0.0210431
P37299	QCR10	Cytochrome b-c1 complex subunit 10 OS=Saccharomyces cerevisiae (strain ATCC 204508 / S288c) GN=QCR10 PE=1 SV=2 - [QCR10_YEAST]	30.868	35.06	2	7	12.8561	1.3±0.11	0.0396813
P50087	MIC26	MICOS subunit MIC26 OS=Saccharomyces cerevisiae (strain ATCC 204508 / S288c) GN=MIC26 PE=1 SV=1 - [MIC26_YEAST]	52.818	30.9	6	14	17.5884	1.3±0.01	0.000665538
P38777	FSH1	Family of serine hydrolases 1 OS=Saccharomyces cerevisiae (strain ATCC 204508 / S288c) GN=FSH1 PE=1 SV=1 - [FSH1_YEAST]	181.529	71.19	16	47	24.8615	1.3±0.1	0.0345414
P53141	MLC1	Myosin light chain 1 OS=Saccharomyces cerevisiae (strain ATCC 204508 / S288c) GN=MLC1 PE=1 SV=1 - [MLC1_YEAST]	359.819	96.64	25	95	24.287	1.3±0.07	0.0187269
P40416	ATM1	Iron-sulfur clusters transporter ATM1, mitochondrial OS=Saccharomyces cerevisiae (strain ATCC 204508 / S288c) GN=ATM1 PE=1 SV=2 - [ATM1_YEAST]	9.32	6.81	3	3	15.1778	1.3±0.06	0.0126828
Q12349	ATP14	ATP synthase subunit H, mitochondrial OS=Saccharomyces cerevisiae (strain ATCC 204508 / S288c) GN=ATP14 PE=1 SV=1 - [ATP14_YEAST]	104.857	62.1	4	24	17.3613	1.3±0.03	0.00373861
P46992	YJL171C	Cell wall protein YJL171C OS=Saccharomyces cerevisiae (strain ATCC 204508 / S288c) GN=YJL171C PE=1 SV=2 - [YJR1_YEAST]	29.8975	11.11	3	8	16.7245	1.3±0.07	0.0179585
Q03667	MIX17	Mitochondrial intermembrane space cysteine motif-containing protein MIX17 OS=Saccharomyces cerevisiae (strain ATCC 204508 / S288c) GN=MIX17 PE=1 SV=1 - [MIX17_YEAST]	59.8365	32.69	2	13	28.9986	1.3±0.08	0.0207796
Score stands for the protein score which is the sum of the scores of the individual peptides generated by PD 1.4.
PSMs stands for total number of spectra used for identification.
Unique Peptides stands for the number of unique peptides used for identification of an specific protein.
Variability [%] stands for variability of reporter ion ratios of unique peptides assigned to each protein.
Mean Ratio ± SD stands for the mean of protein ratios taken from three biological replicates.
p-value stands for the measure of significance.

## Sheet: Table S4
Table S4. The list of downregulated proteins in grx2△.
Accession	Gene Name	Description	Score	Coverage	Unique Peptides	PSMs	Variability	Mean Ratio ± SD	p-value
P32771	SFA1	S-(hydroxymethyl)glutathione dehydrogenase OS=Saccharomyces cerevisiae (strain ATCC 204508 / S288c) GN=SFA1 PE=1 SV=1 - [FADH_YEAST]	156.197	45.85	19	37	14.9499	0.77±0.03	0.00687625
P06779	RAD7	DNA repair protein RAD7 OS=Saccharomyces cerevisiae (strain ATCC 204508 / S288c) GN=RAD7 PE=1 SV=3 - [RAD7_YEAST]	16.4433	7.43	3	4	14.9546	0.77±0.03	0.00653183
P53128	MET13	Methylenetetrahydrofolate reductase 2 OS=Saccharomyces cerevisiae (strain ATCC 204508 / S288c) GN=MET13 PE=1 SV=2 - [MTHR2_YEAST]	27.7156	11	4	8	18.8745	0.77±0.08	0.03679
P53079	COG1	Conserved oligomeric Golgi complex subunit 1 OS=Saccharomyces cerevisiae (strain ATCC 204508 / S288c) GN=COG1 PE=1 SV=1 - [COG1_YEAST]	13.1543	9.83	2	4	43.5642	0.77±0.04	0.00958746
P13185	KIN1	Serine/threonine protein kinase KIN1 OS=Saccharomyces cerevisiae (strain ATCC 204508 / S288c) GN=KIN1 PE=1 SV=3 - [KIN1_YEAST]	97.8206	29.89	20	29	17.8172	0.77±0.01	0.000357768
Q12335	PST2	Protoplast secreted protein 2 OS=Saccharomyces cerevisiae (strain ATCC 204508 / S288c) GN=PST2 PE=1 SV=1 - [PST2_YEAST]	305.758	82.83	9	70	20.2957	0.77±0.02	0.00200501
Q04170	YDR391C	Uncharacterized protein YDR391C OS=Saccharomyces cerevisiae (strain ATCC 204508 / S288c) GN=YDR391C PE=1 SV=1 - [YD391_YEAST]	13.3437	23.71	4	4	15.4286	0.77±0.04	0.0106064
P40011	YER010C	4-hydroxy-4-methyl-2-oxoglutarate aldolase OS=Saccharomyces cerevisiae (strain ATCC 204508 / S288c) GN=YER010C PE=1 SV=1 - [RRAAH_YEAST]	45.1334	38.89	7	12	22.7164	0.76±0.02	0.00338862
P40317	SOK1	Protein SOK1 OS=Saccharomyces cerevisiae (strain ATCC 204508 / S288c) GN=SOK1 PE=1 SV=2 - [SOK1_YEAST]	16.9475	5.55	4	5	9.03259	0.76±0.08	0.0392292
Q02733	IRC15	Increased recombination centers protein 15 OS=Saccharomyces cerevisiae (strain ATCC 204508 / S288c) GN=IRC15 PE=1 SV=1 - [IRC15_YEAST]	33.8396	20.04	7	10	15.3048	0.76±0.05	0.0135766
P38892	CRG1	Probable S-adenosylmethionine-dependent methyltransferase CRG1 OS=Saccharomyces cerevisiae (strain ATCC 204508 / S288c) GN=CRG1 PE=1 SV=1 - [CRG1_YEAST]	24.975	20.96	5	7	10.3841	0.76±0.02	0.00168612
P39721	AIM2	Protein AIM2 OS=Saccharomyces cerevisiae (strain ATCC 204508 / S288c) GN=AIM2 PE=1 SV=1 - [AIM2_YEAST]	28.8843	19.92	4	7	24.7073	0.76±0.04	0.00780362
P53230	TAM41	Phosphatidate cytidylyltransferase, mitochondrial OS=Saccharomyces cerevisiae (strain ATCC 204508 / S288c) GN=TAM41 PE=1 SV=1 - [TAM41_YEAST]	6.72286	5.45	2	2	9.43135	0.76±0.04	0.00824209
Q12305	RDL1	Thiosulfate sulfurtransferase RDL1, mitochondrial OS=Saccharomyces cerevisiae (strain ATCC 204508 / S288c) GN=RDL1 PE=1 SV=1 - [RDL1_YEAST]	353.557	93.53	11	88	24.3201	0.76±0.04	0.00758332
P32604	FBP26	Fructose-2,6-bisphosphatase OS=Saccharomyces cerevisiae (strain ATCC 204508 / S288c) GN=FBP26 PE=1 SV=2 - [F26_YEAST]	67.8066	31.64	10	19	27.5741	0.76±0.02	0.00359552
Q12008	GPM2	Phosphoglycerate mutase 2 OS=Saccharomyces cerevisiae (strain ATCC 204508 / S288c) GN=GPM2 PE=1 SV=1 - [PMG2_YEAST]	78.294	40.19	10	20	14.1832	0.76±0.02	0.00150942
P40364	MPM1	Mitochondrial peculiar membrane protein 1 OS=Saccharomyces cerevisiae (strain ATCC 204508 / S288c) GN=MPM1 PE=1 SV=1 - [MPM1_YEAST]	193.215	63.1	16	47	19.3525	0.76±0.06	0.0169297
P38314	SDS24	Protein SDS24 OS=Saccharomyces cerevisiae (strain ATCC 204508 / S288c) GN=SDS24 PE=1 SV=1 - [SDS24_YEAST]	134.495	43.07	14	34	23.765	0.76±0.04	0.00690115
P34163	TGL1	Sterol esterase TGL1 OS=Saccharomyces cerevisiae (strain ATCC 204508 / S288c) GN=TGL1 PE=1 SV=1 - [TGL1_YEAST]	41.8879	21.53	9	12	13.5983	0.76±0.02	0.00335294
Q03407	PKH1	Serine/threonine-protein kinase PKH1 OS=Saccharomyces cerevisiae (strain ATCC 204508 / S288c) GN=PKH1 PE=1 SV=1 - [PKH1_YEAST]	30.2802	13.84	7	9	14.0958	0.75±0.05	0.0143438
P40557	EPS1	ER-retained PMA1-suppressing protein 1 OS=Saccharomyces cerevisiae (strain ATCC 204508 / S288c) GN=EPS1 PE=1 SV=1 - [EPS1_YEAST]	16.0732	8.99	4	5	20.9612	0.75±0.01	0.000227799
P38235	YBR053C	Uncharacterized protein YBR053C OS=Saccharomyces cerevisiae (strain ATCC 204508 / S288c) GN=YBR053C PE=1 SV=1 - [YBQ3_YEAST]	176.298	45.81	19	49	20.1588	0.75±0.01	0.00108581
Q12320	GLO4	Hydroxyacylglutathione hydrolase, mitochondrial OS=Saccharomyces cerevisiae (strain ATCC 204508 / S288c) GN=GLO4 PE=3 SV=1 - [GLO4_YEAST]	31.0541	30.53	5	8	13.8606	0.75±0.06	0.0179402
Q06137	YLR345W	Putative 6-phosphofructo-2-kinase/fructose-2,6-bisphosphatase YLR345W OS=Saccharomyces cerevisiae (strain ATCC 204508 / S288c) GN=YLR345W PE=1 SV=1 - [YL345_YEAST]	51.5224	21.61	9	13	12.7672	0.75±0.04	0.0089624
P25623	SYP1	Suppressor of yeast profilin deletion OS=Saccharomyces cerevisiae (strain ATCC 204508 / S288c) GN=SYP1 PE=1 SV=3 - [SYP1_YEAST]	174.903	39.31	26	47	21.1998	0.75±0.02	0.00275152
P32793	YSC84	Protein YSC84 OS=Saccharomyces cerevisiae (strain ATCC 204508 / S288c) GN=YSC84 PE=1 SV=2 - [YSC84_YEAST]	53.6274	22.65	5	15	9.2908	0.75±0.05	0.0134599
P53898	NSG2	Protein NSG2 OS=Saccharomyces cerevisiae (strain ATCC 204508 / S288c) GN=NSG2 PE=1 SV=1 - [NSG2_YEAST]	10.6079	7.69	2	3	8.45005	0.75±0.08	0.0336007
Q12508	RMD5	Sporulation protein RMD5 OS=Saccharomyces cerevisiae (strain ATCC 204508 / S288c) GN=RMD5 PE=1 SV=1 - [RMD5_YEAST]	13.7698	9.74	3	4	11.0564	0.75±0.01	0.000693119
Q08886	GPB1	Guanine nucleotide-binding protein subunit beta 1 OS=Saccharomyces cerevisiae (strain ATCC 204508 / S288c) GN=GPB1 PE=1 SV=1 - [GPB1_YEAST]	24.5762	7.8	5	7	10.6185	0.75±0.02	0.00323172
P36047	SDS22	Protein phosphatase 1 regulatory subunit SDS22 OS=Saccharomyces cerevisiae (strain ATCC 204508 / S288c) GN=SDS22 PE=1 SV=1 - [SDS22_YEAST]	170.696	58.88	17	44	13.6186	0.75±0.03	0.00356058
Q01574	ACS1	Acetyl-coenzyme A synthetase 1 OS=Saccharomyces cerevisiae (strain ATCC 204508 / S288c) GN=ACS1 PE=1 SV=2 - [ACS1_YEAST]	1620.81	67.74	50	405	22.7737	0.75±0.01	0.000403373
P40581	HYR1	Peroxiredoxin HYR1 OS=Saccharomyces cerevisiae (strain ATCC 204508 / S288c) GN=HYR1 PE=1 SV=1 - [GPX3_YEAST]	202.271	46.63	8	55	21.7702	0.75±0.06	0.015378
P31109	SNC1	Synaptobrevin homolog 1 OS=Saccharomyces cerevisiae (strain ATCC 204508 / S288c) GN=SNC1 PE=1 SV=1 - [SNC1_YEAST]	14.292	29.91	2	3	12.7275	0.74±0.04	0.00808185
Q3E7A9	CMC4	Cx9C motif-containing protein 4, mitochondrial OS=Saccharomyces cerevisiae (strain ATCC 204508 / S288c) GN=CMC4 PE=3 SV=1 - [CMC4_YEAST]	41.6088	57.53	3	11	15.8173	0.74±0.07	0.0235122
P43590	YFR006W	Uncharacterized peptidase YFR006W OS=Saccharomyces cerevisiae (strain ATCC 204508 / S288c) GN=YFR006W PE=1 SV=1 - [YFH6_YEAST]	160.164	39.63	22	46	28.7923	0.74±0	6.39772e-05
Q12331	YDR262W	FAS1 domain-containing protein YDR262W OS=Saccharomyces cerevisiae (strain ATCC 204508 / S288c) GN=YDR262W PE=1 SV=1 - [YFAS1_YEAST]	44.7247	40.07	9	12	16.3364	0.74±0.09	0.0353929
Q02753	RPL21A	60S ribosomal protein L21-A OS=Saccharomyces cerevisiae (strain ATCC 204508 / S288c) GN=RPL21A PE=1 SV=1 - [RL21A_YEAST]	247.527	64.38	3	74	18.1454	0.74±0.01	0.000834706
P35172	NTH2	Probable trehalase OS=Saccharomyces cerevisiae (strain ATCC 204508 / S288c) GN=NTH2 PE=1 SV=1 - [TREB_YEAST]	36.3068	7.56	2	12	25.0567	0.74±0.09	0.0397615
P17709	GLK1	Glucokinase-1 OS=Saccharomyces cerevisiae (strain ATCC 204508 / S288c) GN=GLK1 PE=1 SV=1 - [HXKG_YEAST]	1026.07	64.4	32	276	31.4858	0.74±0.03	0.00360982
P32643	TMT1	Trans-aconitate 3-methyltransferase OS=Saccharomyces cerevisiae (strain ATCC 204508 / S288c) GN=TMT1 PE=1 SV=1 - [TMT1_YEAST]	22.2215	16.72	5	7	13.3963	0.74±0.05	0.0110464
P40363	YJL068C	S-formylglutathione hydrolase OS=Saccharomyces cerevisiae (strain ATCC 204508 / S288c) GN=YJL068C PE=1 SV=1 - [SFGH_YEAST]	148.533	41.81	13	38	13.5201	0.74±0.03	0.00393106
P25646	PTC6	[Pyruvate dehydrogenase [acetyl-transferring]]-phosphatase 2, mitochondrial OS=Saccharomyces cerevisiae (strain ATCC 204508 / S288c) GN=PTC6 PE=1 SV=2 - [PDP2_YEAST]	13.3131	8.82	3	4	17.8908	0.73±0.05	0.00962908
P36106	BYE1	Transcription factor BYE1 OS=Saccharomyces cerevisiae (strain ATCC 204508 / S288c) GN=BYE1 PE=1 SV=1 - [BYE1_YEAST]	18.5832	7.58	3	6	18.47	0.73±0.07	0.0227814
P22134	MAG1	DNA-3-methyladenine glycosylase OS=Saccharomyces cerevisiae (strain ATCC 204508 / S288c) GN=MAG1 PE=1 SV=1 - [MAG_YEAST]	9.95663	14.86	3	3	9.20435	0.73±0.03	0.00310497
P43583	BLM10	Proteasome activator BLM10 OS=Saccharomyces cerevisiae (strain ATCC 204508 / S288c) GN=BLM10 PE=1 SV=2 - [BLM10_YEAST]	21.9924	4.06	6	7	14.3897	0.73±0.03	0.00334495
P00331	ADH2	Alcohol dehydrogenase 2 OS=Saccharomyces cerevisiae (strain ATCC 204508 / S288c) GN=ADH2 PE=1 SV=3 - [ADH2_YEAST]	3429.01	66.67	14	811	26.406	0.72±0.02	0.001246
Q02933	RNY1	Ribonuclease T2-like OS=Saccharomyces cerevisiae (strain ATCC 204508 / S288c) GN=RNY1 PE=1 SV=1 - [RNY1_YEAST]	27.4178	10.6	4	6	7.10862	0.72±0.05	0.0100233
P40523	YIL055C	Uncharacterized protein YIL055C OS=Saccharomyces cerevisiae (strain ATCC 204508 / S288c) GN=YIL055C PE=1 SV=1 - [YIF5_YEAST]	17.8426	11.32	4	5	39.2656	0.72±0.06	0.0166303
P38071	ETR1	Enoyl-[acyl-carrier-protein] reductase, mitochondrial OS=Saccharomyces cerevisiae (strain ATCC 204508 / S288c) GN=ETR1 PE=1 SV=3 - [ETR1_YEAST]	315.066	65.26	21	78	24.14	0.72±0.02	0.00157886
Q07451	YET3	Endoplasmic reticulum transmembrane protein 3 OS=Saccharomyces cerevisiae (strain ATCC 204508 / S288c) GN=YET3 PE=1 SV=1 - [YET3_YEAST]	22.61	10.84	3	6	9.86756	0.72±0.07	0.0215981
P28003	FUN19	SWIRM domain-containing protein FUN19 OS=Saccharomyces cerevisiae (strain ATCC 204508 / S288c) GN=FUN19 PE=1 SV=3 - [FUN19_YEAST]	15.1957	8.72	3	4	10.1537	0.72±0.06	0.0174294
P38352	SAF1	SCF-associated factor 1 OS=Saccharomyces cerevisiae (strain ATCC 204508 / S288c) GN=SAF1 PE=1 SV=2 - [SAF1_YEAST]	57.5734	27.16	10	16	14.8573	0.72±0.01	0.00089022
Q12032	AIM41	Altered inheritance of mitochondria protein 41, mitochondrial OS=Saccharomyces cerevisiae (strain ATCC 204508 / S288c) GN=AIM41 PE=1 SV=1 - [AIM41_YEAST]	244.704	55.68	21	68	21.9349	0.71±0.06	0.0151491
P53925	YNL115C	Uncharacterized vacuolar membrane protein YNL115C OS=Saccharomyces cerevisiae (strain ATCC 204508 / S288c) GN=YNL115C PE=1 SV=1 - [YNL5_YEAST]	16.3107	10.25	4	5	19.1347	0.71±0.06	0.0158361
P35719	MRP8	Uncharacterized protein MRP8 OS=Saccharomyces cerevisiae (strain ATCC 204508 / S288c) GN=MRP8 PE=1 SV=1 - [MRP8_YEAST]	393.507	81.74	23	97	17.1271	0.71±0.04	0.00640494
Q04869	YMR315W	Uncharacterized protein YMR315W OS=Saccharomyces cerevisiae (strain ATCC 204508 / S288c) GN=YMR315W PE=1 SV=1 - [YM94_YEAST]	205.837	52.15	17	47	19.1826	0.71±0.02	0.00122119
P36004	KKQ8	Probable serine/threonine-protein kinase KKQ8 OS=Saccharomyces cerevisiae (strain ATCC 204508 / S288c) GN=KKQ8 PE=1 SV=2 - [KKQ8_YEAST]	9.90904	10.22	3	3	12.1968	0.71±0.03	0.0027946
P14680	YAK1	Dual specificity protein kinase YAK1 OS=Saccharomyces cerevisiae (strain ATCC 204508 / S288c) GN=YAK1 PE=1 SV=1 - [YAK1_YEAST]	48.3527	12.76	8	14	17.2721	0.7±0.02	0.00135198
Q12523	YPL247C	WD repeat-containing protein YPL247C OS=Saccharomyces cerevisiae (strain ATCC 204508 / S288c) GN=YPL247C PE=1 SV=1 - [YP247_YEAST]	31.6366	16.83	6	9	17.8791	0.7±0.03	0.0041099
P12684	HMG2	3-hydroxy-3-methylglutaryl-coenzyme A reductase 2 OS=Saccharomyces cerevisiae (strain ATCC 204508 / S288c) GN=HMG2 PE=1 SV=1 - [HMDH2_YEAST]	10.106	2.11	2	3	9.91376	0.7±0.04	0.00645916
P53839	GOR1	Glyoxylate reductase 1 OS=Saccharomyces cerevisiae (strain ATCC 204508 / S288c) GN=GOR1 PE=1 SV=1 - [GOR1_YEAST]	150.717	44.57	16	41	18.4413	0.7±0.01	0.000795054
Q04471	YMR114C	Putative peptidase YMR114C OS=Saccharomyces cerevisiae (strain ATCC 204508 / S288c) GN=YMR114C PE=1 SV=1 - [YM04_YEAST]	65.8919	33.97	10	19	19.6167	0.7±0.01	0.000455442
Q00362	CDC55	Protein phosphatase PP2A regulatory subunit B OS=Saccharomyces cerevisiae (strain ATCC 204508 / S288c) GN=CDC55 PE=1 SV=2 - [2ABA_YEAST]	76.102	26.81	13	20	20.1589	0.7±0.02	0.00201576
P19158	IRA2	Inhibitory regulator protein IRA2 OS=Saccharomyces cerevisiae (strain ATCC 204508 / S288c) GN=IRA2 PE=1 SV=2 - [IRA2_YEAST]	11.7709	1.43	4	4	37.9846	0.7±0.04	0.00437403
Q03210	NGL3	Probable RNA exonuclease NGL3 OS=Saccharomyces cerevisiae (strain ATCC 204508 / S288c) GN=NGL3 PE=1 SV=1 - [NGL3_YEAST]	5.72348	5.15	2	2	12.226	0.69±0.02	0.00174501
P32831	NGR1	Negative growth regulatory protein NGR1 OS=Saccharomyces cerevisiae (strain ATCC 204508 / S288c) GN=NGR1 PE=1 SV=2 - [NGR1_YEAST]	17.4881	7.29	3	5	19.2743	0.69±0.02	0.0018551
P23337	GSY1	Glycogen [starch] synthase isoform 1 OS=Saccharomyces cerevisiae (strain ATCC 204508 / S288c) GN=GSY1 PE=1 SV=3 - [GYS1_YEAST]	121.234	27.97	12	32	21.3072	0.69±0.03	0.00285881
P38230	ZTA1	Probable quinone oxidoreductase OS=Saccharomyces cerevisiae (strain ATCC 204508 / S288c) GN=ZTA1 PE=1 SV=1 - [QOR_YEAST]	275.105	66.17	27	69	19.0899	0.69±0.03	0.00297015
P34248	YKL100C	Probable intramembrane protease YKL100C OS=Saccharomyces cerevisiae (strain ATCC 204508 / S288c) GN=YKL100C PE=1 SV=1 - [YKK0_YEAST]	7.38022	4.26	2	2	9.70264	0.68±0.02	0.00204098
P07267	PEP4	Saccharopepsin OS=Saccharomyces cerevisiae (strain ATCC 204508 / S288c) GN=PEP4 PE=1 SV=1 - [CARP_YEAST]	598.774	43.21	22	136	20.0417	0.68±0.04	0.00554914
Q08227	INP54	Phosphatidylinositol 4,5-bisphosphate 5-phosphatase INP54 OS=Saccharomyces cerevisiae (strain ATCC 204508 / S288c) GN=INP54 PE=1 SV=1 - [INP54_YEAST]	5.81237	5.73	2	2	8.20058	0.68±0.05	0.0066775
P00729	PRC1	Carboxypeptidase Y OS=Saccharomyces cerevisiae (strain ATCC 204508 / S288c) GN=PRC1 PE=1 SV=1 - [CBPY_YEAST]	124.436	19.55	8	29	22.1805	0.68±0.08	0.0194953
P41816	OYE3	NADPH dehydrogenase 3 OS=Saccharomyces cerevisiae (strain ATCC 204508 / S288c) GN=OYE3 PE=1 SV=2 - [OYE3_YEAST]	65.4404	22	5	20	15.5746	0.68±0.05	0.0070354
Q12513	TMA17	Translation machinery-associated protein 17 OS=Saccharomyces cerevisiae (strain ATCC 204508 / S288c) GN=TMA17 PE=1 SV=1 - [TMA17_YEAST]	178.511	72.67	11	44	32.9827	0.68±0.01	0.000497766
Q12363	WTM1	Transcriptional modulator WTM1 OS=Saccharomyces cerevisiae (strain ATCC 204508 / S288c) GN=WTM1 PE=1 SV=1 - [WTM1_YEAST]	739.203	50.11	19	187	23.3817	0.67±0.03	0.00270537
P33324	YKL091C	CRAL-TRIO domain-containing protein YKL091C OS=Saccharomyces cerevisiae (strain ATCC 204508 / S288c) GN=YKL091C PE=1 SV=2 - [YKJ1_YEAST]	44.2395	23.55	6	13	15.3968	0.67±0.02	0.000871647
Q07500	NDE2	External NADH-ubiquinone oxidoreductase 2, mitochondrial OS=Saccharomyces cerevisiae (strain ATCC 204508 / S288c) GN=NDE2 PE=1 SV=1 - [NDH2_YEAST]	71.5341	25.5	8	18	27.9775	0.67±0.05	0.0069128
P47011	GLG2	Glycogenin-2 OS=Saccharomyces cerevisiae (strain ATCC 204508 / S288c) GN=GLG2 PE=1 SV=1 - [GLG2_YEAST]	24.9853	17.63	5	7	19.8523	0.66±0.08	0.018738
P37302	APE3	Aminopeptidase Y OS=Saccharomyces cerevisiae (strain ATCC 204508 / S288c) GN=APE3 PE=1 SV=1 - [APE3_YEAST]	517.233	43.2	20	116	18.277	0.66±0.02	0.00179513
P36019	YPT53	GTP-binding protein YPT53 OS=Saccharomyces cerevisiae (strain ATCC 204508 / S288c) GN=YPT53 PE=1 SV=1 - [YPT53_YEAST]	8.77763	14.55	2	3	16.5808	0.66±0.12	0.0382894
P07278	BCY1	cAMP-dependent protein kinase regulatory subunit OS=Saccharomyces cerevisiae (strain ATCC 204508 / S288c) GN=BCY1 PE=1 SV=4 - [KAPR_YEAST]	372.323	67.07	26	94	26.174	0.66±0.01	0.000473935
Q06336	GGA1	ADP-ribosylation factor-binding protein GGA1 OS=Saccharomyces cerevisiae (strain ATCC 204508 / S288c) GN=GGA1 PE=1 SV=1 - [GGA1_YEAST]	91.1881	36.8	17	25	15.5958	0.66±0.04	0.00398897
Q05584	GLO2	Hydroxyacylglutathione hydrolase, cytoplasmic isozyme OS=Saccharomyces cerevisiae (strain ATCC 204508 / S288c) GN=GLO2 PE=1 SV=1 - [GLO2_YEAST]	135.929	62.41	15	36	24.9241	0.66±0.02	0.000665183
P38809	YHR097C	Uncharacterized protein YHR097C OS=Saccharomyces cerevisiae (strain ATCC 204508 / S288c) GN=YHR097C PE=1 SV=1 - [YHP7_YEAST]	48.5031	22.95	6	13	19.2404	0.66±0.01	0.000456401
P09232	PRB1	Cerevisin OS=Saccharomyces cerevisiae (strain ATCC 204508 / S288c) GN=PRB1 PE=1 SV=1 - [PRTB_YEAST]	217.539	22.05	14	53	25.7166	0.66±0.08	0.0172436
P27466	CMK1	Calcium/calmodulin-dependent protein kinase I OS=Saccharomyces cerevisiae (strain ATCC 204508 / S288c) GN=CMK1 PE=1 SV=2 - [KCC1_YEAST]	101.199	36.32	16	29	21.8367	0.66±0.01	0.000112748
P0CT04	PBI2	Protease B inhibitor 2 OS=Saccharomyces cerevisiae (strain ATCC 204508 / S288c) GN=PBI2 PE=1 SV=1 - [IPB2_YEAST]	279.583	66.67	12	80	27.9469	0.65±0.01	0.000545304
P18899	DDR48	Stress protein DDR48 OS=Saccharomyces cerevisiae (strain ATCC 204508 / S288c) GN=DDR48 PE=1 SV=4 - [DDR48_YEAST]	260.991	60	21	65	23.9994	0.65±0.09	0.0233614
P38816	TRR2	Thioredoxin reductase 2, mitochondrial OS=Saccharomyces cerevisiae (strain ATCC 204508 / S288c) GN=TRR2 PE=1 SV=1 - [TRXB2_YEAST]	150.665	41.23	6	36	46.2609	0.65±0.03	0.00293591
O43137	YBR085C-A	Uncharacterized protein YBR085C-A OS=Saccharomyces cerevisiae (strain ATCC 204508 / S288c) GN=YBR085C-A PE=1 SV=1 - [YB085_YEAST]	96.3344	87.06	8	25	21.683	0.65±0.07	0.011959
P27472	GSY2	Glycogen [starch] synthase isoform 2 OS=Saccharomyces cerevisiae (strain ATCC 204508 / S288c) GN=GSY2 PE=1 SV=3 - [GYS2_YEAST]	337.778	38.44	22	85	26.274	0.65±0.02	0.000978147
P00175	CYB2	Cytochrome b2, mitochondrial OS=Saccharomyces cerevisiae (strain ATCC 204508 / S288c) GN=CYB2 PE=1 SV=1 - [CYB2_YEAST]	177.104	34.86	18	48	32.1106	0.65±0	1.06587e-05
Q05812	MSC3	Meiotic sister-chromatid recombination protein 3 OS=Saccharomyces cerevisiae (strain ATCC 204508 / S288c) GN=MSC3 PE=1 SV=1 - [MSC3_YEAST]	115.631	29.53	16	33	21.873	0.65±0.02	0.00099882
P36141	FMP46	Putative redox protein FMP46, mitochondrial OS=Saccharomyces cerevisiae (strain ATCC 204508 / S288c) GN=FMP46 PE=1 SV=1 - [FMP46_YEAST]	53.3973	57.89	7	14	12.2164	0.65±0.01	0.000191853
P17649	UGA1	4-aminobutyrate aminotransferase OS=Saccharomyces cerevisiae (strain ATCC 204508 / S288c) GN=UGA1 PE=1 SV=2 - [GABAT_YEAST]	347.207	56.9	25	90	25.9172	0.64±0.02	0.0015061
P48016	ATH1	Vacuolar acid trehalase OS=Saccharomyces cerevisiae (strain ATCC 204508 / S288c) GN=ATH1 PE=1 SV=1 - [ATH1_YEAST]	84.2479	12.8	13	25	19.8999	0.64±0.05	0.00726548
P23776	EXG1	Glucan 1,3-beta-glucosidase I/II OS=Saccharomyces cerevisiae (strain ATCC 204508 / S288c) GN=EXG1 PE=1 SV=1 - [EXG1_YEAST]	77.3146	33.48	12	21	28.4038	0.64±0.02	0.000985234
P40036	GIP2	GLC7-interacting protein 2 OS=Saccharomyces cerevisiae (strain ATCC 204508 / S288c) GN=GIP2 PE=1 SV=1 - [GIP2_YEAST]	28.4023	12.04	4	8	21.8582	0.64±0.07	0.0119672
Q12012	YOR289W	Uncharacterized protein YOR289W OS=Saccharomyces cerevisiae (strain ATCC 204508 / S288c) GN=YOR289W PE=1 SV=1 - [YO289_YEAST]	81.1399	45.42	12	22	18.7775	0.64±0.02	0.00153908
P27614	CPS1	Carboxypeptidase S OS=Saccharomyces cerevisiae (strain ATCC 204508 / S288c) GN=CPS1 PE=1 SV=2 - [CBPS_YEAST]	216.548	30.38	15	61	32.055	0.63±0.03	0.00279936
Q04212	ARA2	D-arabinose 1-dehydrogenase OS=Saccharomyces cerevisiae (strain ATCC 204508 / S288c) GN=ARA2 PE=1 SV=1 - [ARA2_YEAST]	24.7521	17.31	4	6	43.1136	0.63±0.04	0.00353903
P09938	RNR2	Ribonucleoside-diphosphate reductase small chain 1 OS=Saccharomyces cerevisiae (strain ATCC 204508 / S288c) GN=RNR2 PE=1 SV=2 - [RIR2_YEAST]	567.017	59.9	28	153	25.3719	0.63±0.06	0.00742293
P53912	YNL134C	Uncharacterized protein YNL134C OS=Saccharomyces cerevisiae (strain ATCC 204508 / S288c) GN=YNL134C PE=1 SV=1 - [YNN4_YEAST]	693.1	62.23	22	164	22.706	0.62±0.03	0.00258133
P27796	POT1	3-ketoacyl-CoA thiolase, peroxisomal OS=Saccharomyces cerevisiae (strain ATCC 204508 / S288c) GN=POT1 PE=1 SV=1 - [THIK_YEAST]	265.03	55.4	21	64	30.5662	0.62±0.02	0.00103136
Q06089	YPR098C	Uncharacterized mitochondrial outer membrane protein YPR098C OS=Saccharomyces cerevisiae (strain ATCC 204508 / S288c) GN=YPR098C PE=1 SV=2 - [YP098_YEAST]	15.5549	6.21	2	4	20.9031	0.62±0.05	0.00632668
P40471	AYR1	NADPH-dependent 1-acyldihydroxyacetone phosphate reductase OS=Saccharomyces cerevisiae (strain ATCC 204508 / S288c) GN=AYR1 PE=1 SV=1 - [AYR1_YEAST]	107.112	47.14	11	23	19.3462	0.62±0.04	0.00391464
P38115	ARA1	D-arabinose dehydrogenase [NAD(P)+] heavy chain OS=Saccharomyces cerevisiae (strain ATCC 204508 / S288c) GN=ARA1 PE=1 SV=1 - [ARA1_YEAST]	298.74	68.02	22	75	27.8525	0.62±0.03	0.00256921
P38109	YBR139W	Putative serine carboxypeptidase YBR139W OS=Saccharomyces cerevisiae (strain ATCC 204508 / S288c) GN=YBR139W PE=1 SV=1 - [YBY9_YEAST]	33.9883	14.17	6	9	14.8517	0.61±0.02	0.000649011
P12683	HMG1	3-hydroxy-3-methylglutaryl-coenzyme A reductase 1 OS=Saccharomyces cerevisiae (strain ATCC 204508 / S288c) GN=HMG1 PE=1 SV=1 - [HMDH1_YEAST]	6.49308	2.37	2	2	8.60233	0.61±0.04	0.00365446
Q06151	DCS1	m7GpppX diphosphatase OS=Saccharomyces cerevisiae (strain ATCC 204508 / S288c) GN=DCS1 PE=1 SV=1 - [DCPS_YEAST]	344.988	62.29	20	84	24.4413	0.61±0.03	0.00229849
Q06608	YPR172W	Pyridoxamine 5'-phosphate oxidase homolog OS=Saccharomyces cerevisiae (strain ATCC 204508 / S288c) GN=YPR172W PE=1 SV=1 - [PDXH_YEAST]	51.1367	33.5	4	12	19.4613	0.61±0.04	0.00398687
P47085	YJR008W	MEMO1 family protein YJR008W OS=Saccharomyces cerevisiae (strain ATCC 204508 / S288c) GN=YJR008W PE=1 SV=1 - [YJX8_YEAST]	61.6114	36.98	12	18	30.2216	0.61±0.02	0.000638143
Q08968	FMP40	UPF0061 protein FMP40 OS=Saccharomyces cerevisiae (strain ATCC 204508 / S288c) GN=FMP40 PE=1 SV=1 - [FMP40_YEAST]	85.7723	28.05	18	25	28.8166	0.61±0.04	0.00303645
P36143	GLG1	Glycogenin-1 OS=Saccharomyces cerevisiae (strain ATCC 204508 / S288c) GN=GLG1 PE=1 SV=4 - [GLG1_YEAST]	29.9435	9.74	5	9	21.1803	0.6±0.09	0.0162032
P32861	UGP1	UTP--glucose-1-phosphate uridylyltransferase OS=Saccharomyces cerevisiae (strain ATCC 204508 / S288c) GN=UGP1 PE=1 SV=1 - [UGPA1_YEAST]	626.102	60.52	32	160	33.3497	0.6±0.02	0.000993577
P38067	UGA2	Succinate-semialdehyde dehydrogenase [NADP(+)] OS=Saccharomyces cerevisiae (strain ATCC 204508 / S288c) GN=UGA2 PE=1 SV=2 - [UGA2_YEAST]	156.404	48.89	19	43	37.2409	0.6±0.01	0.000240902
P50088	SPG1	Stationary phase gene 1 protein OS=Saccharomyces cerevisiae (strain ATCC 204508 / S288c) GN=SPG1 PE=1 SV=2 - [SPG1_YEAST]	50.5473	34.74	4	13	33.5552	0.6±0.03	0.00225359
P53252	PIL1	Sphingolipid long chain base-responsive protein PIL1 OS=Saccharomyces cerevisiae (strain ATCC 204508 / S288c) GN=PIL1 PE=1 SV=1 - [PIL1_YEAST]	600.496	49.85	17	143	29.4436	0.59±0.02	0.00107556
P40043	RGI1	Respiratory growth induced protein 1 OS=Saccharomyces cerevisiae (strain ATCC 204508 / S288c) GN=RGI1 PE=1 SV=1 - [RGI1_YEAST]	53.7922	40.99	6	14	15.4769	0.59±0.06	0.00835015
P32350	KNS1	Dual specificity protein kinase KNS1 OS=Saccharomyces cerevisiae (strain ATCC 204508 / S288c) GN=KNS1 PE=1 SV=2 - [KNS1_YEAST]	11.5482	6.38	2	3	26.2864	0.59±0.04	0.00306555
Q06625	GDB1	Glycogen debranching enzyme OS=Saccharomyces cerevisiae (strain ATCC 204508 / S288c) GN=GDB1 PE=1 SV=1 - [GDE_YEAST]	234.121	31.32	35	64	33.4362	0.58±0	7.60483e-06
Q04336	YMR196W	Uncharacterized protein YMR196W OS=Saccharomyces cerevisiae (strain ATCC 204508 / S288c) GN=YMR196W PE=1 SV=1 - [YM54_YEAST]	255.207	36.12	33	68	33.2347	0.58±0.01	0.000322163
Q04458	HFD1	Fatty aldehyde dehydrogenase HFD1 OS=Saccharomyces cerevisiae (strain ATCC 204508 / S288c) GN=HFD1 PE=1 SV=1 - [HFD1_YEAST]	163.728	30.08	15	44	19.8876	0.58±0.02	0.000450012
Q02799	LEE1	Zinc finger protein LEE1 OS=Saccharomyces cerevisiae (strain ATCC 204508 / S288c) GN=LEE1 PE=1 SV=1 - [LEE1_YEAST]	21.2084	16.61	3	6	41.889	0.58±0.06	0.00617556
P00447	SOD2	Superoxide dismutase [Mn], mitochondrial OS=Saccharomyces cerevisiae (strain ATCC 204508 / S288c) GN=SOD2 PE=1 SV=1 - [SODM_YEAST]	211.357	61.37	14	50	25.847	0.58±0.01	0.000173619
Q05050	EIS1	Eisosome protein 1 OS=Saccharomyces cerevisiae (strain ATCC 204508 / S288c) GN=EIS1 PE=1 SV=1 - [EIS1_YEAST]	512.268	67.5	60	137	26.036	0.58±0.02	0.000443458
P40219	OSW5	Outer spore wall protein 5 OS=Saccharomyces cerevisiae (strain ATCC 204508 / S288c) GN=OSW5 PE=1 SV=1 - [OSW5_YEAST]	19.3408	18.92	2	5	27.585	0.57±0.07	0.00823623
P38715	GRE3	NADPH-dependent aldose reductase GRE3 OS=Saccharomyces cerevisiae (strain ATCC 204508 / S288c) GN=GRE3 PE=1 SV=1 - [GRE3_YEAST]	293.392	61.77	28	72	21.9386	0.57±0.03	0.00145262
P32356	NTH1	Neutral trehalase OS=Saccharomyces cerevisiae (strain ATCC 204508 / S288c) GN=NTH1 PE=1 SV=3 - [TREA_YEAST]	251.591	38.62	24	69	31.8304	0.56±0.01	0.000148797
P31688	TPS2	Trehalose-phosphatase OS=Saccharomyces cerevisiae (strain ATCC 204508 / S288c) GN=TPS2 PE=1 SV=3 - [TPS2_YEAST]	316.823	47.66	37	83	27.6347	0.56±0.02	0.000561353
P50107	GLO1	Lactoylglutathione lyase OS=Saccharomyces cerevisiae (strain ATCC 204508 / S288c) GN=GLO1 PE=1 SV=1 - [LGUL_YEAST]	119.264	29.14	11	32	24.7087	0.56±0.03	0.00141145
P04806	HXK1	Hexokinase-1 OS=Saccharomyces cerevisiae (strain ATCC 204508 / S288c) GN=HXK1 PE=1 SV=2 - [HXKA_YEAST]	1266.65	80	36	320	38.889	0.56±0.03	0.00164181
P53184	PNC1	Nicotinamidase OS=Saccharomyces cerevisiae (strain ATCC 204508 / S288c) GN=PNC1 PE=1 SV=1 - [PNC1_YEAST]	281.762	75.93	15	71	42.9166	0.56±0.02	0.000517177
P31539	HSP104	Heat shock protein 104 OS=Saccharomyces cerevisiae (strain ATCC 204508 / S288c) GN=HSP104 PE=1 SV=2 - [HS104_YEAST]	1745.79	67.18	81	466	33.0688	0.56±0.02	0.000591631
P39708	GDH3	NADP-specific glutamate dehydrogenase 2 OS=Saccharomyces cerevisiae (strain ATCC 204508 / S288c) GN=GDH3 PE=3 SV=1 - [DHE5_YEAST]	572.406	83.15	24	134	42.3321	0.56±0.02	0.000887893
P38081	YBR056W	Uncharacterized glycosyl hydrolase YBR056W OS=Saccharomyces cerevisiae (strain ATCC 204508 / S288c) GN=YBR056W PE=1 SV=1 - [YBQ6_YEAST]	148.857	42.51	24	42	23.4919	0.56±0.01	0.000144041
Q03695	YMR206W	Uncharacterized protein YMR206W OS=Saccharomyces cerevisiae (strain ATCC 204508 / S288c) GN=YMR206W PE=4 SV=1 - [YM58_YEAST]	10.029	16.93	3	3	18.3199	0.56±0.04	0.00279388
Q00764	TPS1	Alpha,alpha-trehalose-phosphate synthase [UDP-forming] 56 kDa subunit OS=Saccharomyces cerevisiae (strain ATCC 204508 / S288c) GN=TPS1 PE=1 SV=2 - [TPS1_YEAST]	390.346	52.73	24	95	37.4777	0.56±0.02	0.00091405
P06245	TPK2	cAMP-dependent protein kinase type 2 OS=Saccharomyces cerevisiae (strain ATCC 204508 / S288c) GN=TPK2 PE=1 SV=2 - [KAPB_YEAST]	51.4944	25.26	5	15	23.7678	0.56±0.01	0.000220104
P36060	MCR1	NADH-cytochrome b5 reductase 2 OS=Saccharomyces cerevisiae (strain ATCC 204508 / S288c) GN=MCR1 PE=1 SV=1 - [MCR1_YEAST]	422.825	58.61	23	105	24.7855	0.55±0.02	0.00101513
P36059	YKL151C	ATP-dependent (S)-NAD(P)H-hydrate dehydratase OS=Saccharomyces cerevisiae (strain ATCC 204508 / S288c) GN=YKL151C PE=1 SV=1 - [NNRD_YEAST]	79.9203	43.03	14	21	34.8014	0.55±0.04	0.00249673
P53278	YGR130C	Uncharacterized protein YGR130C OS=Saccharomyces cerevisiae (strain ATCC 204508 / S288c) GN=YGR130C PE=1 SV=1 - [YG3A_YEAST]	316.046	46.81	40	83	23.0974	0.55±0.01	0.000226627
P25619	HSP30	30 kDa heat shock protein OS=Saccharomyces cerevisiae (strain ATCC 204508 / S288c) GN=HSP30 PE=1 SV=1 - [HSP30_YEAST]	6.667	9.04	2	2	11.9387	0.54±0.03	0.000997031
P16547	OM45	Mitochondrial outer membrane protein OM45 OS=Saccharomyces cerevisiae (strain ATCC 204508 / S288c) GN=OM45 PE=1 SV=2 - [OM45_YEAST]	818.554	82.44	61	206	28.2164	0.53±0.01	7.03611e-05
Q12396	EMP46	Protein EMP46 OS=Saccharomyces cerevisiae (strain ATCC 204508 / S288c) GN=EMP46 PE=1 SV=1 - [EMP46_YEAST]	37.673	19.14	7	10	33.6156	0.53±0.02	0.000629495
P24784	DBP1	ATP-dependent RNA helicase DBP1 OS=Saccharomyces cerevisiae (strain ATCC 204508 / S288c) GN=DBP1 PE=1 SV=2 - [DBP1_YEAST]	161.078	36.14	14	44	28.6878	0.53±0.03	0.000952879
P00924	ENO1	Enolase 1 OS=Saccharomyces cerevisiae (strain ATCC 204508 / S288c) GN=ENO1 PE=1 SV=3 - [ENO1_YEAST]	4673.46	83.3	23	1192	42.0412	0.53±0.01	0.000293153
P40165	YNL200C	NAD(P)H-hydrate epimerase OS=Saccharomyces cerevisiae (strain ATCC 204508 / S288c) GN=YNL200C PE=1 SV=1 - [NNRE_YEAST]	85.1637	34.55	9	21	26.7457	0.52±0.02	0.000404802
P36014	GPX1	Glutathione peroxidase 1 OS=Saccharomyces cerevisiae (strain ATCC 204508 / S288c) GN=GPX1 PE=3 SV=1 - [GPX1_YEAST]	26.5344	31.14	3	7	39.8208	0.52±0.04	0.00190057
Q04432	HSP31	Glutathione-independent glyoxalase HSP31 OS=Saccharomyces cerevisiae (strain ATCC 204508 / S288c) GN=HSP31 PE=1 SV=1 - [HSP31_YEAST]	208.734	77.64	18	52	38.6664	0.52±0.02	0.000530924
P38427	TSL1	Trehalose synthase complex regulatory subunit TSL1 OS=Saccharomyces cerevisiae (strain ATCC 204508 / S288c) GN=TSL1 PE=1 SV=1 - [TSL1_YEAST]	481.104	45.63	38	118	39.6855	0.52±0.02	0.000408663
P53130	GPG1	Heterotrimeric G protein gamma subunit GPG1 OS=Saccharomyces cerevisiae (strain ATCC 204508 / S288c) GN=GPG1 PE=1 SV=1 - [GPG1_YEAST]	17.6989	22.22	2	4	19.2515	0.51±0.04	0.00208454
Q07651	FMP45	SUR7 family protein FMP45 OS=Saccharomyces cerevisiae (strain ATCC 204508 / S288c) GN=FMP45 PE=1 SV=1 - [FMP45_YEAST]	18.9574	19.42	2	4	23.543	0.51±0.02	0.000602874
P40187	PIG2	GSY2-interacting protein PIG2 OS=Saccharomyces cerevisiae (strain ATCC 204508 / S288c) GN=PIG2 PE=1 SV=1 - [PIG2_YEAST]	14.9047	8.36	4	5	33.3689	0.51±0.08	0.00968098
Q12068	GRE2	NADPH-dependent methylglyoxal reductase GRE2 OS=Saccharomyces cerevisiae (strain ATCC 204508 / S288c) GN=GRE2 PE=1 SV=1 - [GRE2_YEAST]	159.395	40.94	12	42	25.0918	0.5±0.04	0.00195723
P06738	GPH1	Glycogen phosphorylase OS=Saccharomyces cerevisiae (strain ATCC 204508 / S288c) GN=GPH1 PE=1 SV=4 - [PHSG_YEAST]	543.489	52.44	43	146	42.6732	0.5±0.03	0.0009454
P22855	AMS1	Alpha-mannosidase OS=Saccharomyces cerevisiae (strain ATCC 204508 / S288c) GN=AMS1 PE=1 SV=2 - [MAN1_YEAST]	423.685	36.29	41	119	33.3481	0.5±0.01	5.63745e-05
Q12230	LSP1	Sphingolipid long chain base-responsive protein LSP1 OS=Saccharomyces cerevisiae (strain ATCC 204508 / S288c) GN=LSP1 PE=1 SV=1 - [LSP1_YEAST]	536.586	52.79	17	136	34.779	0.5±0.01	9.95028e-05
Q07551	YDL124W	NADPH-dependent alpha-keto amide reductase OS=Saccharomyces cerevisiae (strain ATCC 204508 / S288c) GN=YDL124W PE=1 SV=1 - [KAR_YEAST]	494.768	80.77	27	123	34.6345	0.49±0.02	0.000483093
P32775	GLC3	1,4-alpha-glucan-branching enzyme OS=Saccharomyces cerevisiae (strain ATCC 204508 / S288c) GN=GLC3 PE=1 SV=2 - [GLGB_YEAST]	198.341	33.66	21	54	33.2266	0.49±0.01	5.63013e-05
P14065	GCY1	Glycerol 2-dehydrogenase (NADP(+)) OS=Saccharomyces cerevisiae (strain ATCC 204508 / S288c) GN=GCY1 PE=1 SV=1 - [GCY1_YEAST]	246.042	68.27	20	63	27.8198	0.49±0.01	5.33235e-05
P36139	PET10	Protein PET10 OS=Saccharomyces cerevisiae (strain ATCC 204508 / S288c) GN=PET10 PE=1 SV=3 - [PET10_YEAST]	183.648	57.24	17	47	31.0034	0.49±0.04	0.00161511
P40168	YNL195C	Uncharacterized protein YNL195C OS=Saccharomyces cerevisiae (strain ATCC 204508 / S288c) GN=YNL195C PE=4 SV=2 - [YNT5_YEAST]	105.356	64.37	11	30	39.423	0.48±0.04	0.00167975
P38616	YGP1	Protein YGP1 OS=Saccharomyces cerevisiae (strain ATCC 204508 / S288c) GN=YGP1 PE=1 SV=2 - [YGP1_YEAST]	180.403	30.51	10	46	38.0803	0.47±0.01	0.000159816
P06244	TPK1	cAMP-dependent protein kinase type 1 OS=Saccharomyces cerevisiae (strain ATCC 204508 / S288c) GN=TPK1 PE=1 SV=3 - [KAPA_YEAST]	68.1729	34.51	8	19	18.8582	0.47±0.04	0.00169695
P39987	ECM10	Heat shock protein SSC3, mitochondrial OS=Saccharomyces cerevisiae (strain ATCC 204508 / S288c) GN=ECM10 PE=3 SV=1 - [HSP7E_YEAST]	322.183	20.34	3	82	13.9907	0.47±0.02	0.000598527
Q00055	GPD1	Glycerol-3-phosphate dehydrogenase [NAD(+)] 1 OS=Saccharomyces cerevisiae (strain ATCC 204508 / S288c) GN=GPD1 PE=1 SV=4 - [GPD1_YEAST]	463.441	59.85	23	116	47.62	0.46±0.02	0.000277448
P32590	SSE2	Heat shock protein homolog SSE2 OS=Saccharomyces cerevisiae (strain ATCC 204508 / S288c) GN=SSE2 PE=1 SV=3 - [HSP79_YEAST]	740.586	68.69	47	189	41.2804	0.45±0.01	6.4003e-05
Q12329	HSP42	Heat shock protein 42 OS=Saccharomyces cerevisiae (strain ATCC 204508 / S288c) GN=HSP42 PE=1 SV=1 - [HSP42_YEAST]	127.355	42.67	14	35	32.2945	0.45±0.02	0.000464396
P47771	ALD2	Aldehyde dehydrogenase [NAD(P)+] 1 OS=Saccharomyces cerevisiae (strain ATCC 204508 / S288c) GN=ALD2 PE=1 SV=2 - [ALDH2_YEAST]	369.817	60.87	10	91	28.5807	0.44±0.02	0.000487608
Q04120	TSA2	Peroxiredoxin TSA2 OS=Saccharomyces cerevisiae (strain ATCC 204508 / S288c) GN=TSA2 PE=1 SV=3 - [TSA2_YEAST]	50.537	26.53	4	15	31.6615	0.44±0.04	0.00137144
P37012	PGM2	Phosphoglucomutase 2 OS=Saccharomyces cerevisiae (strain ATCC 204508 / S288c) GN=PGM2 PE=1 SV=1 - [PGM2_YEAST]	559.901	62.21	28	146	45.7537	0.44±0.01	0.000189165
P47137	YJR096W	Uncharacterized oxidoreductase YJR096W OS=Saccharomyces cerevisiae (strain ATCC 204508 / S288c) GN=YJR096W PE=1 SV=1 - [YJ66_YEAST]	160.375	71.63	18	40	38.0688	0.43±0.02	0.000368806
Q12355	PST1	Cell wall mannoprotein PST1 OS=Saccharomyces cerevisiae (strain ATCC 204508 / S288c) GN=PST1 PE=1 SV=1 - [PST1_YEAST]	90.0774	19.14	8	23	46.5525	0.43±0.02	0.000563243
P38841	YHR138C	Uncharacterized protein YHR138C OS=Saccharomyces cerevisiae (strain ATCC 204508 / S288c) GN=YHR138C PE=1 SV=1 - [YHT8_YEAST]	119.248	68.42	7	27	34.0557	0.43±0.03	0.000788497
Q3E841	YNR034W-A	Uncharacterized protein YNR034W-A OS=Saccharomyces cerevisiae (strain ATCC 204508 / S288c) GN=YNR034W-A PE=1 SV=1 - [YN034_YEAST]	190.616	77.55	10	46	37.0832	0.41±0.05	0.00248266
P40188	RGI2	Respiratory growth induced protein 2 OS=Saccharomyces cerevisiae (strain ATCC 204508 / S288c) GN=RGI2 PE=1 SV=1 - [RGI2_YEAST]	217.576	64.02	10	57	36.3889	0.41±0.01	9.38247e-05
Q12123	DCS2	Inactive diphosphatase DCS2 OS=Saccharomyces cerevisiae (strain ATCC 204508 / S288c) GN=DCS2 PE=1 SV=3 - [DCS2_YEAST]	205.114	61.19	19	53	40.5345	0.41±0.01	0.000129679
P35736	YKL050C	Uncharacterized protein YKL050C OS=Saccharomyces cerevisiae (strain ATCC 204508 / S288c) GN=YKL050C PE=2 SV=1 - [YKF0_YEAST]	21.5334	8.35	5	6	46.2176	0.41±0.06	0.00290328
Q07993	XYL2	D-xylulose reductase OS=Saccharomyces cerevisiae (strain ATCC 204508 / S288c) GN=XYL2 PE=1 SV=1 - [XYL2_YEAST]	7.25535	7.58	2	2	49.953	0.38±0.01	4.5618e-05
P38284	ICS2	Increased copper sensitivity protein 2 OS=Saccharomyces cerevisiae (strain ATCC 204508 / S288c) GN=ICS2 PE=1 SV=2 - [ICS2_YEAST]	13.0361	18.82	3	4	31.9939	0.38±0.05	0.00186008
P0CX10	ERR1	Enolase-related protein 1 OS=Saccharomyces cerevisiae (strain ATCC 204508 / S288c) GN=ERR1 PE=3 SV=1 - [ERR1_YEAST]	53.9355	22.43	9	15	48.8814	0.37±0.04	0.00143142
P35195	ECM15	UPF0045 protein ECM15 OS=Saccharomyces cerevisiae (strain ATCC 204508 / S288c) GN=ECM15 PE=1 SV=1 - [ECM15_YEAST]	11.4736	13.46	2	4	13.8812	0.36±0.13	0.0143593
P00360	TDH1	Glyceraldehyde-3-phosphate dehydrogenase 1 OS=Saccharomyces cerevisiae (strain ATCC 204508 / S288c) GN=TDH1 PE=1 SV=3 - [G3P1_YEAST]	4829.76	82.23	25	1289	49.9618	0.34±0.02	0.000226039
P40582	GTT1	Glutathione S-transferase 1 OS=Saccharomyces cerevisiae (strain ATCC 204508 / S288c) GN=GTT1 PE=1 SV=1 - [GST1_YEAST]	145.39	43.16	14	36	49.4556	0.31±0.01	8.00829e-05
P18963	IRA1	Inhibitory regulator protein IRA1 OS=Saccharomyces cerevisiae (strain ATCC 204508 / S288c) GN=IRA1 PE=1 SV=2 - [IRA1_YEAST]	10.0395	1.36	3	3	36.5163	0.28±0.01	5.89236e-05
P38804	RTC3	Restriction of telomere capping protein 3 OS=Saccharomyces cerevisiae (strain ATCC 204508 / S288c) GN=RTC3 PE=1 SV=1 - [SDO1L_YEAST]	101.487	54.95	7	28	47.2178	0.27±0.04	0.0009087
Q04902	SNO4	Probable glutathione-independent glyoxalase SNO4 OS=Saccharomyces cerevisiae (strain ATCC 204508 / S288c) GN=SNO4 PE=3 SV=1 - [SNO4_YEAST]	17.0319	18.99	4	5	19.1781	0.23±0.05	0.00134873
P53878	YNL181W	Uncharacterized oxidoreductase YNL181W OS=Saccharomyces cerevisiae (strain ATCC 204508 / S288c) GN=YNL181W PE=1 SV=2 - [YNS1_YEAST]	9.06047	3.93	2	3	42.0945	0.12±0.11	0.00488047
Score stands for the protein score which is the sum of the scores of the individual peptides generated by PD 1.4.
PSMs stands for total number of spectra used for identification.
Unique Peptides stands for the number of unique peptides used for identification of an specific protein.
Variability [%] stands for variability of reporter ion ratios of unique peptides assigned to each protein.
Mean Ratio ± SD stands for the mean of protein ratios taken from three biological replicates.
p-value stands for the measure of significance.
